# Supplementary material for: Pulsed sounds caused by internal oxygen transport during photosynthesis in the seagrass Halophila ovalis
Source: PeerJ. 2024 Sep 26;12:e18114. doi: 10.7717/peerj.18114 (PMC11439383; doi:10.7717/peerj.18114)
Supplement: Supplemental Information 2 [file peerj-12-18114-s002.xlsx]

## Sheet: 1. result A pulse ch.
	1. High rate pulse series…a		Slow rate pulse series:										Reform data
			A. Main energy below 2kHz (L1)		c. main energy concentrate at 2 kHz; one freq peak		d. Broad band pulse: (no break)		e, with breaks and or weaker		f. mainly above 2 kHz		high pulse rate		Low pulse rate		L3 data pooled:
	2.4		3.6		3.4		3.1		3.6		2.5		2.4		3.6		3.1
	2.1		3.4		3.4		3		3.8		2.6		2.1		3.4		3
	2.8		3.5		3.1		3		3.8		2.4		2.8		3.5		3
	2		3.4		3.2		3		3.9		2.4		2		3.4		3
	2.4		3.5		3.3		3.1		3.9		2.6		2.4		3.5		3.1
	2.4		3.6		3.6		3.1		3.1		2.5		2.4		3.6		3.1
	2.2		3.5		3.5		3		3.1		2.5		2.2		3.5		3
	2.5		3.7		3.3		3		3.2		2.4		2.5		3.7		3
	2.5		3.8		3.8		3		3.3		2.5		2.5		3.8		3
	2.5		3.5		3.4		3.1		3.4		2.6		2.5		3.5		3.1
	2.5		3.5		3.3		3		3.3		2.5		2.5		3.5		3
	2.7		3.6		3.6		3.1		3.1		2.5		2.7		3.6		3.1
	2.4		3.7		3.2		3.1		3.1		2.5		2.4		3.7		3.1
	2.3		4		3.2		3		3.2		2.5		2.3		4		3
	2.6		3.3		3.3		3.1		3.2		2.5		2.6		3.3		3.1
	2.6		3.8		3.3		3		3		2.5		2.6		3.8		3
	2.5		3.8		3.1		3		2.7		2.5		2.5		3.8		3
	2.5		3.3		3.1		3		3.3		2.5		2.5		3.3		3
	2.4		3.4		3.2		3.4		3.2		2.5		2.4		3.4		3.4
	1.8		3.4		3.3		3		3.3		2.5		1.8		3.4		3
	2		3.4		3.3		3.1		3.1				2		3.4		3.1
	2		3.5		3.3		3.1		3.2				2		3.5		3.1
	2.3		3.6		3.3		3		3				2.3		3.6		3
	2		3.6		3.1		3.1		2.8				2		3.6		3.1
	2.9		3.6		3.1		3.3		2.9				2.9		3.6		3.3
	2		3.9		3.1		3.2		2.9				2		3.9		3.2
	2.5		3.2		3.1		3.2		2.7				2.5		3.2		3.2
	2		3.5		3.2		3.3		2.7				2		3.5		3.3
	2.4		4.8		3.3		2.9		2.7				2.4		4.8		2.9
	2		4.6		3.4		3.1		3.3				2		4.6		3.1
HR			4.5		3.2		3.08		3.3						4.5		3.6
N	30		4.7	main energy concentrate at 2 kHz L2					3.4						4.7		3.8
AVE	2.34		4.6	N	31				3.3						4.6		3.8
SD	0.273672		4.7	AVE	3.29032				3.3						4.7		3.9
			4.5	SD	0.168037										4.5		3.9
			4.5												4.5		3.1
			4.4												4.4		3.1
			4.4												4.4		3.2
		A. Main energy below 2kHz (L1)													3.4		3.3
		N	38												3.4		3.4
		AVE	3.82368												3.1		3.3
		SD	0.484034												3.2		3.1
															3.3		3.1
															3.6		3.2
															3.5		3.2
															3.3		3
	A. pulse sound characters														3.8		2.7
		HR	L1	L2	L3										3.4		3.3
	N	30	38	31	84										3.3		3.2
	AVE	2.34	3.82368	3.29032	2.99405										3.6		3.3
	SD	0.273672	0.484034	0.168037	0.35681										3.2		3.1
															3.2		3.2
															3.3		3
		HR	L1+L2+L3												3.3		2.8
	N	30	153												3.1		2.9
	AVE	2.34	3.26013												3.1		2.9
	SD	0.273672	0.500833												3.2		2.7
															3.3		2.7
															3.3		2.7
															3.3		3.3
															3.3		3.3
															3.1		3.4
															3.1		3.3
															3.1		3.3
															3.1		2.5
															3.2		2.6
															3.3		2.4
															3.4		2.4
															3.2		2.6
															3.1		2.5
															3		2.5
															3		2.4
															3		2.5
															3.1		2.6
															3.1		2.5
															3		2.5
															3		2.5
															3		2.5
															3.1		2.5
															3		2.5
															3.1		2.5
															3.1		2.5
															3		2.5
															3.1		2.5
															3
															3	L3
															3	N	84
															3.4	AVE	2.99405
															3	SD	0.35681
															3.1
															3.1
															3
															3.1
															3.3
															3.2
															3.2
															3.3
															2.9
															3.1
															3.6
															3.8
															3.8
															3.9
															3.9
															3.1
															3.1
															3.2
															3.3
															3.4
															3.3
															3.1
															3.1
															3.2
															3.2
															3
															2.7
															3.3
															3.2
															3.3
															3.1
															3.2
															3
															2.8
															2.9
															2.9
															2.7
															2.7
															2.7
															3.3
															3.3
															3.4
															3.3
															3.3
															2.5
															2.6
															2.4
															2.4
															2.6
															2.5
															2.5
															2.4
															2.5
															2.6
															2.5
															2.5
															2.5
															2.5
															2.5
															2.5
															2.5
															2.5
															2.5
															2.5
														AVE	3.26013
														SD	0.500833

## Sheet: Figure3
								<2k	Ca. 2k	Wide range
		Hour	A	A_SD	B_SD	C_SD	D_SD	L1	L2	L3
	0600				0	0	0	0	0	0	0
	0700				1	0.6	4.9	2.4	1.9	8.7	13
	0800				2.3	0.3	0.7	4	0.7	1.7	6.4
	0900		39	1.65	0.7	0.6	5.9	3.8	3.1	6.3	13.2
	1000		38	2.7	0.5	0	1.9	4.2	0	3.4	7.6
	1100		77.9	40.9	0	4.5	0.6	0	18.2	2.2	20.4
	1200		84.8	24	0.1	1.4	0.2	1.7	15.2	1.1	18
	1300				1.2	4.4	1.8	2	9.9	3.2	15.1
	1400				1.4	1.7	1.1	3.1	2.3	2.7	8.1
	1500				0.9	0.6	0.5	3.1	0.9	2.5	6.5
	1600				0.3	0.6	1.1	1.8	1.1	2.7	5.6
	1700				0	0	1	0	0	2.6	2.6
	1800				0	0	0.5	0	0	1	1
													High rate									BCD
													Sum B+C+D vs. Lux

## Sheet: Fig.3 BCD summary
				Time	Lux	Time	Lux	Time	Lux	Time	Lux	Time	Lux	Time	Lux	Time	Lux	Time	Lux	Time	Lux	Time	Lux	Time	Lux	Time	Lux	Time	Lux
				2020-07-25 06:02:01	4034.56	2020-07-25 07:02:01	17310.7	2020-07-25 08:02:01	57241.6	2020-07-25 09:02:01	77127.7	2020-07-25 10:02:01	97075.2	2020-07-25 11:02:01	88883.2	2020-07-25 12:02:01	72458.2	2020-07-25 13:02:01	34324.5	2020-07-25 14:02:01	39116.8	2020-07-25 15:02:01	20633.6	2020-07-25 16:02:01	19138.6	2020-07-25 17:02:01	9871.36	2020-07-25 18:02:01	6830.08
				2020-07-25 06:05:01	3825.92	2020-07-25 07:05:01	16732.2	2020-07-25 08:05:01	38307.8	2020-07-25 09:05:01	79032.3	2020-07-25 10:05:01	97321	2020-07-25 11:05:01	89415.7	2020-07-25 12:05:01	93552.6	2020-07-25 13:05:01	29767.7	2020-07-25 14:05:01	41482.2	2020-07-25 15:05:01	20280.3	2020-07-25 16:05:01	19840	2020-07-25 17:05:01	9556.48	2020-07-25 18:05:01	5306.88
				2020-07-25 06:08:01	4517.12	2020-07-25 07:08:01	16409.6	2020-07-25 08:08:01	23316.5	2020-07-25 09:08:01	78643.2	2020-07-25 10:08:01	99000.3	2020-07-25 11:08:01	102605	2020-07-25 12:08:01	63651.8	2020-07-25 13:08:01	40806.4	2020-07-25 14:08:01	34232.3	2020-07-25 15:08:01	17786.9	2020-07-25 16:08:01	20428.8	2020-07-25 17:08:01	8832	2020-07-25 18:08:01	4704
				2020-07-25 06:11:01	5273.6	2020-07-25 07:11:01	17546.2	2020-07-25 08:11:01	45383.7	2020-07-25 09:11:01	79298.6	2020-07-25 10:11:01	98140.2	2020-07-25 11:11:01	98836.5	2020-07-25 12:11:01	69242.9	2020-07-25 13:11:01	23705.6	2020-07-25 14:11:01	32389.1	2020-07-25 15:11:01	23439.4	2020-07-25 16:11:01	22087.7	2020-07-25 17:11:01	8706.56	2020-07-25 18:11:01	4364.8
				2020-07-25 06:14:01	6883.84	2020-07-25 07:14:01	33556.5	2020-07-25 08:14:01	43786.2	2020-07-25 09:14:01	84254.7	2020-07-25 10:14:01	73953.3	2020-07-25 11:14:01	97034.2	2020-07-25 12:14:01	80404.5	2020-07-25 13:14:01	32512	2020-07-25 14:14:01	34560	2020-07-25 15:14:01	25251.8	2020-07-25 16:14:01	20203.5	2020-07-25 17:14:01	8893.44	2020-07-25 18:14:01	3790.08
				2020-07-25 06:17:01	7936	2020-07-25 07:17:01	29296.6	2020-07-25 08:17:01	57425.9	2020-07-25 09:17:01	85688.3	2020-07-25 10:17:01	63385.6	2020-07-25 11:17:01	91504.6	2020-07-25 12:17:01	57446.4	2020-07-25 13:17:01	36935.7	2020-07-25 14:17:01	28047.4	2020-07-25 15:17:01	23838.7	2020-07-25 16:17:01	20710.4	2020-07-25 17:17:01	9011.2	2020-07-25 18:17:01	3530.24
				2020-07-25 06:20:01	7431.68	2020-07-25 07:20:01	33699.8	2020-07-25 08:20:01	69120	2020-07-25 09:20:01	85565.4	2020-07-25 10:20:01	62832.6	2020-07-25 11:20:01	94945.3	2020-07-25 12:20:01	79831	2020-07-25 13:20:01	41185.3	2020-07-25 14:20:01	28293.1	2020-07-25 15:20:01	21903.4	2020-07-25 16:20:01	20162.6	2020-07-25 17:20:01	8181.76	2020-07-25 18:20:01	3139.84
				2020-07-25 06:23:01	7462.4	2020-07-25 07:23:01	28006.4	2020-07-25 08:23:01	70983.7	2020-07-25 09:23:01	85319.7	2020-07-25 10:23:01	76738.6	2020-07-25 11:23:01	103137	2020-07-25 12:23:01	40888.3	2020-07-25 13:23:01	40540.2	2020-07-25 14:23:01	29726.7	2020-07-25 15:23:01	17776.6	2020-07-25 16:23:01	15011.8	2020-07-25 17:23:01	9251.84	2020-07-25 18:23:01	2760.96
				2020-07-25 06:26:01	7764.48	2020-07-25 07:26:01	37929	2020-07-25 08:26:01	72335.4	2020-07-25 09:26:01	88801.3	2020-07-25 10:26:01	66949.1	2020-07-25 11:26:01	96256	2020-07-25 12:26:01	45711.4	2020-07-25 13:26:01	40908.8	2020-07-25 14:26:01	18621.4	2020-07-25 15:26:01	23040	2020-07-25 16:26:01	11985.9	2020-07-25 17:26:01	8573.44	2020-07-25 18:26:01	2385.28
				2020-07-25 06:29:01	7047.68	2020-07-25 07:29:01	42516.5	2020-07-25 08:29:01	71454.7	2020-07-25 09:29:01	87531.5	2020-07-25 10:29:01	77803.5	2020-07-25 11:29:01	95191	2020-07-25 12:29:01	46858.2	2020-07-25 13:29:01	23500.8	2020-07-25 14:29:01	19312.6	2020-07-25 15:29:01	18304	2020-07-25 16:29:01	21309.4	2020-07-25 17:29:01	7444.48	2020-07-25 18:29:01	2084.48
				2020-07-25 06:32:01	8076.8	2020-07-25 07:32:01	47206.4	2020-07-25 08:32:01	74588.2	2020-07-25 09:32:01	88309.8	2020-07-25 10:32:01	66273.3	2020-07-25 11:32:01	71086.1	2020-07-25 12:32:01	42168.3	2020-07-25 13:32:01	26460.2	2020-07-25 14:32:01	22190.1	2020-07-25 15:32:01	12902.4	2020-07-25 16:32:01	27873.3	2020-07-25 17:32:01	7127.04	2020-07-25 18:32:01	1736.96
				2020-07-25 06:35:01	10183.7	2020-07-25 07:35:01	47841.3	2020-07-25 08:35:01	81551.4	2020-07-25 09:35:01	90398.7	2020-07-25 10:35:01	100352	2020-07-25 11:35:01	70246.4	2020-07-25 12:35:01	43581.4	2020-07-25 13:35:01	40202.2	2020-07-25 14:35:01	21360.6	2020-07-25 15:35:01	14346.2	2020-07-25 16:35:01	22036.5	2020-07-25 17:35:01	6353.92	2020-07-25 18:35:01	1396.48
				2020-07-25 06:38:01	10690.6	2020-07-25 07:38:01	50032.6	2020-07-25 08:38:01	46346.2	2020-07-25 09:38:01	92405.8	2020-07-25 10:38:01	87859.2	2020-07-25 11:38:01	71802.9	2020-07-25 12:38:01	40826.9	2020-07-25 13:38:01	37806.1	2020-07-25 14:38:01	25159.7	2020-07-25 15:38:01	18974.7	2020-07-25 16:38:01	17745.9	2020-07-25 17:38:01	5516.8	2020-07-25 18:38:01	1055.04
				2020-07-25 06:41:01	11479	2020-07-25 07:41:01	51609.6	2020-07-25 08:41:01	68280.3	2020-07-25 09:41:01	94289.9	2020-07-25 10:41:01	80343	2020-07-25 11:41:01	69488.6	2020-07-25 12:41:01	38604.8	2020-07-25 13:41:01	47063	2020-07-25 14:41:01	17740.8	2020-07-25 15:41:01	17075.2	2020-07-25 16:41:01	15959	2020-07-25 17:41:01	6510.08	2020-07-25 18:41:01	765.76
				2020-07-25 06:44:01	11868.2	2020-07-25 07:44:01	53248	2020-07-25 08:44:01	70430.7	2020-07-25 09:44:01	93921.3	2020-07-25 10:44:01	90849.3	2020-07-25 11:44:01	67113	2020-07-25 12:44:01	36608	2020-07-25 13:44:01	36945.9	2020-07-25 14:44:01	17269.8	2020-07-25 15:44:01	17628.2	2020-07-25 16:44:01	13706.2	2020-07-25 17:44:01	5724.16	2020-07-25 18:44:01	514.72
				2020-07-25 06:47:01	10449.9	2020-07-25 07:47:01	56217.6	2020-07-25 08:47:01	65822.7	2020-07-25 09:47:01	94658.6	2020-07-25 10:47:01	89251.8	2020-07-25 11:47:01	66416.6	2020-07-25 12:47:01	36730.9	2020-07-25 13:47:01	38338.6	2020-07-25 14:47:01	20321.3	2020-07-25 15:47:01	18437.1	2020-07-25 16:47:01	23111.7	2020-07-25 17:47:01	7329.28	2020-07-25 18:47:01	72.6
				2020-07-25 06:50:01	10457.6	2020-07-25 07:50:01	57466.9	2020-07-25 08:50:01	60887	2020-07-25 09:50:01	94617.6	2020-07-25 10:50:01	100966	2020-07-25 11:50:01	66150.4	2020-07-25 12:50:01	40560.6	2020-07-25 13:50:01	42127.4	2020-07-25 14:50:01	20265	2020-07-25 15:50:01	15723.5	2020-07-25 16:50:01	17264.6	2020-07-25 17:50:01	8573.44
				2020-07-25 06:53:01	11074.6	2020-07-25 07:53:01	60641.3	2020-07-25 08:53:01	61583.4	2020-07-25 09:53:01	94781.4	2020-07-25 10:53:01	93675.5	2020-07-25 11:53:01	74117.1	2020-07-25 12:53:01	40028.2	2020-07-25 13:53:01	29870.1	2020-07-25 14:53:01	28672	2020-07-25 15:53:01	19865.6	2020-07-25 16:53:01	16020.5	2020-07-25 17:53:01	9886.72
				2020-07-25 06:56:01	12948.5	2020-07-25 07:56:01	57385	2020-07-25 08:56:01	65884.2	2020-07-25 09:56:01	96624.6	2020-07-25 10:56:01	84090.9	2020-07-25 11:56:01	67481.6	2020-07-25 12:56:01	38871	2020-07-25 13:56:01	26777.6	2020-07-25 14:56:01	26378.2	2020-07-25 15:56:01	19328	2020-07-25 16:56:01	12753.9	2020-07-25 17:56:01	8471.04
				2020-07-25 06:59:01	14745.6	2020-07-25 07:59:01	61009.9	2020-07-25 08:59:01	70799.4	2020-07-25 09:59:01	95559.7	2020-07-25 10:59:01	99000.3	2020-07-25 11:59:01	69959.7	2020-07-25 12:59:01	33853.4	2020-07-25 13:59:01	33341.4	2020-07-25 14:59:01	17326.1	2020-07-25 15:59:01	19763.2	2020-07-25 16:59:01	10854.4	2020-07-25 17:59:01	9018.88
					8707.58		40783.1		60776.4		88341.5		85293.1		82583.6		52094		35156		26123.3		19314.9		18410.2		8141.7		2777.39
					Sum_B+C+D	Ave_LUX
				0600	0	8707.58
					13	40783.1
				0800	6.4	60776.4
					13.2	88341.5
				1000	7.6	85293.1
					20.4	82583.6
				1200	18	52094
					15.1	35156													Light intensity (Lux)
				1400	8.1	26123.3
					6.5	19314.9
				1600	5.6	18410.2
					2.6	8141.7

## Sheet: HOBO DATALUX
Plot Title: Qitou Bay seagrass bed0724
#	Temp, °C	Date Time, GMT +0800	Date Time, GMT +0800	Intensity, lux
1	33.5882	2020-07-24 18:20:01	2020-07-24 18:20:01	2052.48
2	32.3441	2020-07-24 18:23:01	2020-07-24 18:23:01	313.44
3	31.2716	2020-07-24 18:26:01	2020-07-24 18:26:01	345.12
4	30.242	2020-07-24 18:29:01	2020-07-24 18:29:01	2342.4
5	29.8988	2020-07-24 18:32:01	2020-07-24 18:32:01	1910.4
6	29.6843	2020-07-24 18:35:01	2020-07-24 18:35:01	1521.92
7	29.5127	2020-07-24 18:38:01	2020-07-24 18:38:01	1163.52
8	29.4269	2020-07-24 18:41:01	2020-07-24 18:41:01	839.04
9	29.384	2020-07-24 18:44:01	2020-07-24 18:44:01	568.96
10	29.2982	2020-07-24 18:47:01	2020-07-24 18:47:01	388
11	29.1695	2020-07-24 18:50:01	2020-07-24 18:50:01	277.92
12	29.1266	2020-07-24 18:53:01	2020-07-24 18:53:01	182.8
13	29.0408	2020-07-24 18:56:01	2020-07-24 18:56:01	110.88
14	29.0408	2020-07-24 18:59:01	2020-07-24 18:59:01	60.32
15	28.955	2020-07-24 19:02:01	2020-07-24 19:02:01	29.98
16	28.9979	2020-07-24 19:05:01	2020-07-24 19:05:01	14.92
17	28.8692	2020-07-24 19:08:01	2020-07-24 19:08:01	7.08
18	28.8692	2020-07-24 19:11:01	2020-07-24 19:11:01	3.17
19	28.7405	2020-07-24 19:14:01	2020-07-24 19:14:01	1.22
20	28.7834	2020-07-24 19:17:01	2020-07-24 19:17:01	0.24
21	28.7405	2020-07-24 19:20:01	2020-07-24 19:20:01	0
22	28.7405	2020-07-24 19:23:01	2020-07-24 19:23:01	0
23	28.6547	2020-07-24 19:26:01	2020-07-24 19:26:01	0
24	28.6547	2020-07-24 19:29:01	2020-07-24 19:29:01	0
25	28.5689	2020-07-24 19:32:01	2020-07-24 19:32:01	0
26	28.6118	2020-07-24 19:35:01	2020-07-24 19:35:01	0
27	28.526	2020-07-24 19:38:01	2020-07-24 19:38:01	0
28	28.4831	2020-07-24 19:41:01	2020-07-24 19:41:01	0
29	28.4831	2020-07-24 19:44:01	2020-07-24 19:44:01	0
30	28.3973	2020-07-24 19:47:01	2020-07-24 19:47:01	0
31	28.3973	2020-07-24 19:50:01	2020-07-24 19:50:01	0
32	28.3115	2020-07-24 19:53:01	2020-07-24 19:53:01	0
33	28.3115	2020-07-24 19:56:01	2020-07-24 19:56:01	0
34	28.2686	2020-07-24 19:59:01	2020-07-24 19:59:01	0
35	28.2686	2020-07-24 20:02:01	2020-07-24 20:02:01	0
36	28.1828	2020-07-24 20:05:01	2020-07-24 20:05:01	0
37	28.1828	2020-07-24 20:08:01	2020-07-24 20:08:01	0
38	28.1828	2020-07-24 20:11:01	2020-07-24 20:11:01	0
39	28.1828	2020-07-24 20:14:01	2020-07-24 20:14:01	0
40	28.1399	2020-07-24 20:17:01	2020-07-24 20:17:01	0
41	28.097	2020-07-24 20:20:01	2020-07-24 20:20:01	0
42	28.097	2020-07-24 20:23:01	2020-07-24 20:23:01	0
43	28.097	2020-07-24 20:26:01	2020-07-24 20:26:01	0
44	28.097	2020-07-24 20:29:01	2020-07-24 20:29:01	0
45	28.097	2020-07-24 20:32:01	2020-07-24 20:32:01	0
46	28.0112	2020-07-24 20:35:01	2020-07-24 20:35:01	0
47	28.0541	2020-07-24 20:38:01	2020-07-24 20:38:01	0
48	27.9683	2020-07-24 20:41:01	2020-07-24 20:41:01	0
49	27.9683	2020-07-24 20:44:01	2020-07-24 20:44:01	0
50	27.9254	2020-07-24 20:47:01	2020-07-24 20:47:01	0
51	27.8825	2020-07-24 20:50:01	2020-07-24 20:50:01	0
52	27.9254	2020-07-24 20:53:01	2020-07-24 20:53:01	0
53	27.9254	2020-07-24 20:56:01	2020-07-24 20:56:01	0
54	27.8825	2020-07-24 20:59:01	2020-07-24 20:59:01	0
55	27.8396	2020-07-24 21:02:01	2020-07-24 21:02:01	0
56	27.7967	2020-07-24 21:05:01	2020-07-24 21:05:01	0
57	27.7538	2020-07-24 21:08:01	2020-07-24 21:08:01	0
58	27.7538	2020-07-24 21:11:01	2020-07-24 21:11:01	0
59	27.7109	2020-07-24 21:14:01	2020-07-24 21:14:01	0
60	27.668	2020-07-24 21:17:01	2020-07-24 21:17:01	0
61	27.6251	2020-07-24 21:20:01	2020-07-24 21:20:01	0
62	27.668	2020-07-24 21:23:01	2020-07-24 21:23:01	0
63	27.668	2020-07-24 21:26:01	2020-07-24 21:26:01	0
64	27.6251	2020-07-24 21:29:01	2020-07-24 21:29:01	0
65	27.6251	2020-07-24 21:32:01	2020-07-24 21:32:01	0
66	27.5393	2020-07-24 21:35:01	2020-07-24 21:35:01	0
67	27.5822	2020-07-24 21:38:01	2020-07-24 21:38:01	0
68	27.4964	2020-07-24 21:41:01	2020-07-24 21:41:01	0
69	27.4964	2020-07-24 21:44:01	2020-07-24 21:44:01	0
70	27.4106	2020-07-24 21:47:01	2020-07-24 21:47:01	0
71	27.4106	2020-07-24 21:50:01	2020-07-24 21:50:01	0
72	27.4535	2020-07-24 21:53:01	2020-07-24 21:53:01	0
73	27.3677	2020-07-24 21:56:01	2020-07-24 21:56:01	0
74	27.3248	2020-07-24 21:59:01	2020-07-24 21:59:01	0
75	27.3248	2020-07-24 22:02:01	2020-07-24 22:02:01	0
76	27.3677	2020-07-24 22:05:01	2020-07-24 22:05:01	0
77	27.3677	2020-07-24 22:08:01	2020-07-24 22:08:01	0
78	27.3248	2020-07-24 22:11:01	2020-07-24 22:11:01	0
79	27.3677	2020-07-24 22:14:01	2020-07-24 22:14:01	0
80	27.3677	2020-07-24 22:17:01	2020-07-24 22:17:01	0
81	27.3248	2020-07-24 22:20:01	2020-07-24 22:20:01	0
82	27.3248	2020-07-24 22:23:01	2020-07-24 22:23:01	0
83	27.3677	2020-07-24 22:26:01	2020-07-24 22:26:01	0
84	27.3677	2020-07-24 22:29:01	2020-07-24 22:29:01	0
85	27.2819	2020-07-24 22:32:01	2020-07-24 22:32:01	0
86	27.3248	2020-07-24 22:35:01	2020-07-24 22:35:01	0
87	27.3677	2020-07-24 22:38:01	2020-07-24 22:38:01	0
88	27.3248	2020-07-24 22:41:01	2020-07-24 22:41:01	0
89	27.4106	2020-07-24 22:44:01	2020-07-24 22:44:01	0
90	27.4535	2020-07-24 22:47:01	2020-07-24 22:47:01	0
91	27.4106	2020-07-24 22:50:01	2020-07-24 22:50:01	0
92	27.4535	2020-07-24 22:53:01	2020-07-24 22:53:01	0
93	27.3677	2020-07-24 22:56:01	2020-07-24 22:56:01	0
94	27.3677	2020-07-24 22:59:01	2020-07-24 22:59:01	0
95	27.3677	2020-07-24 23:02:01	2020-07-24 23:02:01	0
96	27.4106	2020-07-24 23:05:01	2020-07-24 23:05:01	0
97	27.3677	2020-07-24 23:08:01	2020-07-24 23:08:01	0
98	27.3677	2020-07-24 23:11:01	2020-07-24 23:11:01	0
99	27.3677	2020-07-24 23:14:01	2020-07-24 23:14:01	0
100	27.3677	2020-07-24 23:17:01	2020-07-24 23:17:01	0
101	27.4106	2020-07-24 23:20:01	2020-07-24 23:20:01	0
102	27.4535	2020-07-24 23:23:01	2020-07-24 23:23:01	0
103	27.4535	2020-07-24 23:26:01	2020-07-24 23:26:01	0
104	27.4106	2020-07-24 23:29:01	2020-07-24 23:29:01	0
105	27.4106	2020-07-24 23:32:01	2020-07-24 23:32:01	0
106	27.4106	2020-07-24 23:35:01	2020-07-24 23:35:01	0
107	27.3677	2020-07-24 23:38:01	2020-07-24 23:38:01	0
108	27.4106	2020-07-24 23:41:01	2020-07-24 23:41:01	0
109	27.5822	2020-07-24 23:44:01	2020-07-24 23:44:01	0
110	27.5393	2020-07-24 23:47:01	2020-07-24 23:47:01	0
111	27.5393	2020-07-24 23:50:01	2020-07-24 23:50:01	0
112	27.5822	2020-07-24 23:53:01	2020-07-24 23:53:01	0
113	27.5822	2020-07-24 23:56:01	2020-07-24 23:56:01	0
114	28.0112	2020-07-24 23:59:01	2020-07-24 23:59:01	0
115	28.0112	2020-07-25 00:02:01	2020-07-25 00:02:01	0
116	27.7538	2020-07-25 00:05:01	2020-07-25 00:05:01	0
117	27.5393	2020-07-25 00:08:01	2020-07-25 00:08:01	0
118	27.4964	2020-07-25 00:11:01	2020-07-25 00:11:01	0
119	27.5393	2020-07-25 00:14:01	2020-07-25 00:14:01	0
120	27.6251	2020-07-25 00:17:01	2020-07-25 00:17:01	0
121	27.4964	2020-07-25 00:20:01	2020-07-25 00:20:01	0
122	27.4535	2020-07-25 00:23:01	2020-07-25 00:23:01	0
123	27.3677	2020-07-25 00:26:01	2020-07-25 00:26:01	0
124	27.3677	2020-07-25 00:29:01	2020-07-25 00:29:01	0
125	27.2819	2020-07-25 00:32:01	2020-07-25 00:32:01	0
126	27.2819	2020-07-25 00:35:01	2020-07-25 00:35:01	0
127	27.1961	2020-07-25 00:38:01	2020-07-25 00:38:01	0
128	27.2819	2020-07-25 00:41:01	2020-07-25 00:41:01	0
129	27.239	2020-07-25 00:44:01	2020-07-25 00:44:01	0
130	27.2819	2020-07-25 00:47:01	2020-07-25 00:47:01	0
131	27.2819	2020-07-25 00:50:01	2020-07-25 00:50:01	0
132	27.3248	2020-07-25 00:53:01	2020-07-25 00:53:01	0
133	27.3677	2020-07-25 00:56:01	2020-07-25 00:56:01	0
134	27.3248	2020-07-25 00:59:01	2020-07-25 00:59:01	0
135	27.3248	2020-07-25 01:02:01	2020-07-25 01:02:01	0
136	27.3248	2020-07-25 01:05:01	2020-07-25 01:05:01	0
137	27.4106	2020-07-25 01:08:01	2020-07-25 01:08:01	0
138	27.4106	2020-07-25 01:11:01	2020-07-25 01:11:01	0
139	27.4964	2020-07-25 01:14:01	2020-07-25 01:14:01	0
140	27.4964	2020-07-25 01:17:01	2020-07-25 01:17:01	0
141	27.5393	2020-07-25 01:20:01	2020-07-25 01:20:01	0
142	27.5393	2020-07-25 01:23:01	2020-07-25 01:23:01	0
143	27.5393	2020-07-25 01:26:01	2020-07-25 01:26:01	0
144	27.5393	2020-07-25 01:29:01	2020-07-25 01:29:01	0
145	27.5822	2020-07-25 01:32:01	2020-07-25 01:32:01	0
146	27.5822	2020-07-25 01:35:01	2020-07-25 01:35:01	0
147	27.6251	2020-07-25 01:38:01	2020-07-25 01:38:01	0
148	27.5822	2020-07-25 01:41:01	2020-07-25 01:41:01	0
149	27.5822	2020-07-25 01:44:01	2020-07-25 01:44:01	0
150	27.5393	2020-07-25 01:47:01	2020-07-25 01:47:01	0
151	27.4535	2020-07-25 01:50:01	2020-07-25 01:50:01	0
152	27.3677	2020-07-25 01:53:01	2020-07-25 01:53:01	0
153	27.239	2020-07-25 01:56:01	2020-07-25 01:56:01	0
154	27.1532	2020-07-25 01:59:01	2020-07-25 01:59:01	0
155	27.1532	2020-07-25 02:02:01	2020-07-25 02:02:01	0
156	27.1532	2020-07-25 02:05:01	2020-07-25 02:05:01	0
157	27.1532	2020-07-25 02:08:01	2020-07-25 02:08:01	0
158	27.1532	2020-07-25 02:11:01	2020-07-25 02:11:01	0
159	27.1532	2020-07-25 02:14:01	2020-07-25 02:14:01	0
160	27.1532	2020-07-25 02:17:01	2020-07-25 02:17:01	0
161	27.1532	2020-07-25 02:20:01	2020-07-25 02:20:01	0
162	27.239	2020-07-25 02:23:01	2020-07-25 02:23:01	0
163	27.1961	2020-07-25 02:26:01	2020-07-25 02:26:01	0
164	27.239	2020-07-25 02:29:01	2020-07-25 02:29:01	0
165	27.1961	2020-07-25 02:32:01	2020-07-25 02:32:01	0
166	27.1961	2020-07-25 02:35:01	2020-07-25 02:35:01	0
167	27.239	2020-07-25 02:38:01	2020-07-25 02:38:01	0
168	27.3248	2020-07-25 02:41:01	2020-07-25 02:41:01	0
169	27.2819	2020-07-25 02:44:01	2020-07-25 02:44:01	0
170	27.2819	2020-07-25 02:47:01	2020-07-25 02:47:01	0
171	27.3248	2020-07-25 02:50:01	2020-07-25 02:50:01	0
172	27.3248	2020-07-25 02:53:01	2020-07-25 02:53:01	0
173	27.3677	2020-07-25 02:56:01	2020-07-25 02:56:01	0
174	27.3677	2020-07-25 02:59:01	2020-07-25 02:59:01	0
175	27.3677	2020-07-25 03:02:01	2020-07-25 03:02:01	0
176	27.3248	2020-07-25 03:05:01	2020-07-25 03:05:01	0
177	27.3677	2020-07-25 03:08:01	2020-07-25 03:08:01	0
178	27.3248	2020-07-25 03:11:01	2020-07-25 03:11:01	0
179	27.3677	2020-07-25 03:14:01	2020-07-25 03:14:01	0
180	27.3248	2020-07-25 03:17:01	2020-07-25 03:17:01	0
181	27.3248	2020-07-25 03:20:01	2020-07-25 03:20:01	0
182	27.3248	2020-07-25 03:23:01	2020-07-25 03:23:01	0
183	27.3248	2020-07-25 03:26:01	2020-07-25 03:26:01	0
184	27.3248	2020-07-25 03:29:01	2020-07-25 03:29:01	0
185	27.3248	2020-07-25 03:32:01	2020-07-25 03:32:01	0
186	27.3677	2020-07-25 03:35:01	2020-07-25 03:35:01	0
187	27.3677	2020-07-25 03:38:01	2020-07-25 03:38:01	0
188	27.3677	2020-07-25 03:41:01	2020-07-25 03:41:01	0
189	27.3677	2020-07-25 03:44:01	2020-07-25 03:44:01	0
190	27.3677	2020-07-25 03:47:01	2020-07-25 03:47:01	0
191	27.3677	2020-07-25 03:50:01	2020-07-25 03:50:01	0
192	27.3677	2020-07-25 03:53:01	2020-07-25 03:53:01	0
193	27.4106	2020-07-25 03:56:01	2020-07-25 03:56:01	0
194	27.3677	2020-07-25 03:59:01	2020-07-25 03:59:01	0
195	27.4106	2020-07-25 04:02:01	2020-07-25 04:02:01	0
196	27.4535	2020-07-25 04:05:01	2020-07-25 04:05:01	0
197	27.4535	2020-07-25 04:08:01	2020-07-25 04:08:01	0
198	27.4535	2020-07-25 04:11:01	2020-07-25 04:11:01	0
199	27.4964	2020-07-25 04:14:01	2020-07-25 04:14:01	0
200	27.4535	2020-07-25 04:17:01	2020-07-25 04:17:01	0
201	27.4964	2020-07-25 04:20:01	2020-07-25 04:20:01	0
202	27.5393	2020-07-25 04:23:01	2020-07-25 04:23:01	0
203	27.5393	2020-07-25 04:26:01	2020-07-25 04:26:01	0
204	27.4964	2020-07-25 04:29:01	2020-07-25 04:29:01	0
205	27.4964	2020-07-25 04:32:01	2020-07-25 04:32:01	0
206	27.5393	2020-07-25 04:35:01	2020-07-25 04:35:01	0
207	27.5822	2020-07-25 04:38:01	2020-07-25 04:38:01	0
208	27.5822	2020-07-25 04:41:01	2020-07-25 04:41:01	0
209	27.5822	2020-07-25 04:44:01	2020-07-25 04:44:01	0
210	27.5822	2020-07-25 04:47:01	2020-07-25 04:47:01	0
211	27.5822	2020-07-25 04:50:01	2020-07-25 04:50:01	0
212	27.5822	2020-07-25 04:53:01	2020-07-25 04:53:01	0
213	27.6251	2020-07-25 04:56:01	2020-07-25 04:56:01	0
214	27.5822	2020-07-25 04:59:01	2020-07-25 04:59:01	0
215	27.6251	2020-07-25 05:02:01	2020-07-25 05:02:01	0.24
216	27.6251	2020-07-25 05:05:01	2020-07-25 05:05:01	0.73
217	27.6251	2020-07-25 05:08:01	2020-07-25 05:08:01	2.19
218	27.6251	2020-07-25 05:11:01	2020-07-25 05:11:01	5.37
219	27.6251	2020-07-25 05:14:01	2020-07-25 05:14:01	11.96
220	27.6251	2020-07-25 05:17:01	2020-07-25 05:17:01	24.05
221	27.5822	2020-07-25 05:20:01	2020-07-25 05:20:01	48.04
222	27.668	2020-07-25 05:23:01	2020-07-25 05:23:01	80.48
223	27.7538	2020-07-25 05:26:01	2020-07-25 05:26:01	130.4
224	27.8825	2020-07-25 05:29:01	2020-07-25 05:29:01	194.4
225	27.8396	2020-07-25 05:32:01	2020-07-25 05:32:01	319.04
226	27.7538	2020-07-25 05:35:01	2020-07-25 05:35:01	468.32
227	27.7538	2020-07-25 05:38:01	2020-07-25 05:38:01	641.28
228	27.7109	2020-07-25 05:41:01	2020-07-25 05:41:01	881.92
229	27.668	2020-07-25 05:44:01	2020-07-25 05:44:01	1210.24
230	27.668	2020-07-25 05:47:01	2020-07-25 05:47:01	1549.44
231	27.7109	2020-07-25 05:50:01	2020-07-25 05:50:01	1871.36
232	27.668	2020-07-25 05:53:01	2020-07-25 05:53:01	2358.4
233	27.668	2020-07-25 05:56:01	2020-07-25 05:56:01	3057.92
234	27.7109	2020-07-25 05:59:01	2020-07-25 05:59:01	3649.28
235	27.7109	2020-07-25 06:02:01	2020-07-25 06:02:01	4034.56
236	27.7538	2020-07-25 06:05:01	2020-07-25 06:05:01	3825.92
237	27.7538	2020-07-25 06:08:01	2020-07-25 06:08:01	4517.12
238	27.7538	2020-07-25 06:11:01	2020-07-25 06:11:01	5273.6
239	27.8396	2020-07-25 06:14:01	2020-07-25 06:14:01	6883.84
240	27.9254	2020-07-25 06:17:01	2020-07-25 06:17:01	7936
241	27.9254	2020-07-25 06:20:01	2020-07-25 06:20:01	7431.68
242	27.9683	2020-07-25 06:23:01	2020-07-25 06:23:01	7462.4
243	28.0112	2020-07-25 06:26:01	2020-07-25 06:26:01	7764.48
244	28.0541	2020-07-25 06:29:01	2020-07-25 06:29:01	7047.68
245	28.097	2020-07-25 06:32:01	2020-07-25 06:32:01	8076.8
246	28.1828	2020-07-25 06:35:01	2020-07-25 06:35:01	10183.7
247	28.2686	2020-07-25 06:38:01	2020-07-25 06:38:01	10690.6
248	28.3115	2020-07-25 06:41:01	2020-07-25 06:41:01	11479
249	28.3544	2020-07-25 06:44:01	2020-07-25 06:44:01	11868.2
250	28.3544	2020-07-25 06:47:01	2020-07-25 06:47:01	10449.9
251	28.3544	2020-07-25 06:50:01	2020-07-25 06:50:01	10457.6
252	28.3544	2020-07-25 06:53:01	2020-07-25 06:53:01	11074.6
253	28.4402	2020-07-25 06:56:01	2020-07-25 06:56:01	12948.5
254	28.6118	2020-07-25 06:59:01	2020-07-25 06:59:01	14745.6	8707.58
255	28.7834	2020-07-25 07:02:01	2020-07-25 07:02:01	17310.7
256	28.9121	2020-07-25 07:05:01	2020-07-25 07:05:01	16732.2				0600	0
257	28.8692	2020-07-25 07:08:01	2020-07-25 07:08:01	16409.6				0700	13
258	28.9121	2020-07-25 07:11:01	2020-07-25 07:11:01	17546.2				0800	6.4
259	29.4698	2020-07-25 07:14:01	2020-07-25 07:14:01	33556.5				0900	13.2
260	29.7701	2020-07-25 07:17:01	2020-07-25 07:17:01	29296.6				1000	7.6
261	30.0704	2020-07-25 07:20:01	2020-07-25 07:20:01	33699.8				1100	20.4
262	29.9417	2020-07-25 07:23:01	2020-07-25 07:23:01	28006.4				1200	18
263	30.3278	2020-07-25 07:26:01	2020-07-25 07:26:01	37929				1300	15.1
264	30.8855	2020-07-25 07:29:01	2020-07-25 07:29:01	42516.5				1400	8.1
265	31.3574	2020-07-25 07:32:01	2020-07-25 07:32:01	47206.4				1500	6.5
266	31.5719	2020-07-25 07:35:01	2020-07-25 07:35:01	47841.3				1600	5.6
267	31.7864	2020-07-25 07:38:01	2020-07-25 07:38:01	50032.6				1700	2.6
268	32.0867	2020-07-25 07:41:01	2020-07-25 07:41:01	51609.6				1800	1
269	32.2583	2020-07-25 07:44:01	2020-07-25 07:44:01	53248
270	32.6873	2020-07-25 07:47:01	2020-07-25 07:47:01	56217.6
271	32.8589	2020-07-25 07:50:01	2020-07-25 07:50:01	57466.9
272	33.0734	2020-07-25 07:53:01	2020-07-25 07:53:01	60641.3
273	33.245	2020-07-25 07:56:01	2020-07-25 07:56:01	57385
274	33.5024	2020-07-25 07:59:01	2020-07-25 07:59:01	61009.9	40783.1
275	33.4166	2020-07-25 08:02:01	2020-07-25 08:02:01	57241.6
276	32.7731	2020-07-25 08:05:01	2020-07-25 08:05:01	38307.8
277	31.6577	2020-07-25 08:08:01	2020-07-25 08:08:01	23316.5
278	32.0867	2020-07-25 08:11:01	2020-07-25 08:11:01	45383.7
279	32.6015	2020-07-25 08:14:01	2020-07-25 08:14:01	43786.2
280	33.2879	2020-07-25 08:17:01	2020-07-25 08:17:01	57425.9
281	34.4033	2020-07-25 08:20:01	2020-07-25 08:20:01	69120
282	34.8323	2020-07-25 08:23:01	2020-07-25 08:23:01	70983.7
283	35.1755	2020-07-25 08:26:01	2020-07-25 08:26:01	72335.4
284	35.2613	2020-07-25 08:29:01	2020-07-25 08:29:01	71454.7
285	35.4758	2020-07-25 08:32:01	2020-07-25 08:32:01	74588.2
286	35.9478	2020-07-25 08:35:01	2020-07-25 08:35:01	81551.4
287	35.7333	2020-07-25 08:38:01	2020-07-25 08:38:01	46346.2
288	34.7036	2020-07-25 08:41:01	2020-07-25 08:41:01	68280.3
289	35.8191	2020-07-25 08:44:01	2020-07-25 08:44:01	70430.7
290	35.6045	2020-07-25 08:47:01	2020-07-25 08:47:01	65822.7
291	35.4329	2020-07-25 08:50:01	2020-07-25 08:50:01	60887
292	35.0039	2020-07-25 08:53:01	2020-07-25 08:53:01	61583.4
293	35.2613	2020-07-25 08:56:01	2020-07-25 08:56:01	65884.2
294	35.7333	2020-07-25 08:59:01	2020-07-25 08:59:01	70799.4	60776.4
295	36.3768	2020-07-25 09:02:01	2020-07-25 09:02:01	77127.7
296	36.6342	2020-07-25 09:05:01	2020-07-25 09:05:01	79032.3
297	36.8916	2020-07-25 09:08:01	2020-07-25 09:08:01	78643.2
298	37.1061	2020-07-25 09:11:01	2020-07-25 09:11:01	79298.6
299	37.578	2020-07-25 09:14:01	2020-07-25 09:14:01	84254.7
300	37.7925	2020-07-25 09:17:01	2020-07-25 09:17:01	85688.3
301	38.0928	2020-07-25 09:20:01	2020-07-25 09:20:01	85565.4
302	38.3502	2020-07-25 09:23:01	2020-07-25 09:23:01	85319.7
303	38.7792	2020-07-25 09:26:01	2020-07-25 09:26:01	88801.3
304	39.2082	2020-07-25 09:29:01	2020-07-25 09:29:01	87531.5
305	39.3798	2020-07-25 09:32:01	2020-07-25 09:32:01	88309.8
306	39.4227	2020-07-25 09:35:01	2020-07-25 09:35:01	90398.7
307	39.8517	2020-07-25 09:38:01	2020-07-25 09:38:01	92405.8
308	40.2807	2020-07-25 09:41:01	2020-07-25 09:41:01	94289.9
309	40.1949	2020-07-25 09:44:01	2020-07-25 09:44:01	93921.3
310	40.4523	2020-07-25 09:47:01	2020-07-25 09:47:01	94658.6
311	40.581	2020-07-25 09:50:01	2020-07-25 09:50:01	94617.6
312	40.6668	2020-07-25 09:53:01	2020-07-25 09:53:01	94781.4
313	40.8813	2020-07-25 09:56:01	2020-07-25 09:56:01	96624.6
314	40.7097	2020-07-25 09:59:01	2020-07-25 09:59:01	95559.7
315	41.01	2020-07-25 10:02:01	2020-07-25 10:02:01	97075.2
316	41.2674	2020-07-25 10:05:01	2020-07-25 10:05:01	97321
317	41.3532	2020-07-25 10:08:01	2020-07-25 10:08:01	99000.3
318	41.6535	2020-07-25 10:11:01	2020-07-25 10:11:01	98140.2
319	41.2674	2020-07-25 10:14:01	2020-07-25 10:14:01	73953.3
320	40.3236	2020-07-25 10:17:01	2020-07-25 10:17:01	63385.6
321	40.4094	2020-07-25 10:20:01	2020-07-25 10:20:01	62832.6
322	40.1091	2020-07-25 10:23:01	2020-07-25 10:23:01	76738.6
323	39.2082	2020-07-25 10:26:01	2020-07-25 10:26:01	66949.1
324	39.5085	2020-07-25 10:29:01	2020-07-25 10:29:01	77803.5
325	39.4656	2020-07-25 10:32:01	2020-07-25 10:32:01	66273.3
326	40.5381	2020-07-25 10:35:01	2020-07-25 10:35:01	100352
327	40.9671	2020-07-25 10:38:01	2020-07-25 10:38:01	87859.2
328	41.0529	2020-07-25 10:41:01	2020-07-25 10:41:01	80343
329	41.0529	2020-07-25 10:44:01	2020-07-25 10:44:01	90849.3
330	40.7526	2020-07-25 10:47:01	2020-07-25 10:47:01	89251.8
331	41.439	2020-07-25 10:50:01	2020-07-25 10:50:01	100966
332	41.5677	2020-07-25 10:53:01	2020-07-25 10:53:01	93675.5
333	41.4819	2020-07-25 10:56:01	2020-07-25 10:56:01	84090.9
334	41.6964	2020-07-25 10:59:01	2020-07-25 10:59:01	99000.3
335	41.5248	2020-07-25 11:02:01	2020-07-25 11:02:01	88883.2
336	41.1387	2020-07-25 11:05:01	2020-07-25 11:05:01	89415.7
337	42.0396	2020-07-25 11:08:01	2020-07-25 11:08:01	102605
338	41.9109	2020-07-25 11:11:01	2020-07-25 11:11:01	98836.5
339	42.3828	2020-07-25 11:14:01	2020-07-25 11:14:01	97034.2
340	41.9109	2020-07-25 11:17:01	2020-07-25 11:17:01	91504.6
341	42.3399	2020-07-25 11:20:01	2020-07-25 11:20:01	94945.3
342	42.3828	2020-07-25 11:23:01	2020-07-25 11:23:01	103137
343	42.5115	2020-07-25 11:26:01	2020-07-25 11:26:01	96256
344	42.3399	2020-07-25 11:29:01	2020-07-25 11:29:01	95191
345	39.2511	2020-07-25 11:32:01	2020-07-25 11:32:01	71086.1
346	38.7363	2020-07-25 11:35:01	2020-07-25 11:35:01	70246.4
347	39.2082	2020-07-25 11:38:01	2020-07-25 11:38:01	71802.9
348	38.9508	2020-07-25 11:41:01	2020-07-25 11:41:01	69488.6
349	38.7363	2020-07-25 11:44:01	2020-07-25 11:44:01	67113
350	36.1623	2020-07-25 11:47:01	2020-07-25 11:47:01	66416.6
351	34.532	2020-07-25 11:50:01	2020-07-25 11:50:01	66150.4
352	33.5882	2020-07-25 11:53:01	2020-07-25 11:53:01	74117.1
353	32.9447	2020-07-25 11:56:01	2020-07-25 11:56:01	67481.6
354	32.6444	2020-07-25 11:59:01	2020-07-25 11:59:01	69959.7
355	32.6444	2020-07-25 12:02:01	2020-07-25 12:02:01	72458.2
356	32.7731	2020-07-25 12:05:01	2020-07-25 12:05:01	93552.6
357	32.9018	2020-07-25 12:08:01	2020-07-25 12:08:01	63651.8
358	32.9447	2020-07-25 12:11:01	2020-07-25 12:11:01	69242.9
359	32.9018	2020-07-25 12:14:01	2020-07-25 12:14:01	80404.5
360	33.0734	2020-07-25 12:17:01	2020-07-25 12:17:01	57446.4
361	33.0734	2020-07-25 12:20:01	2020-07-25 12:20:01	79831
362	32.8589	2020-07-25 12:23:01	2020-07-25 12:23:01	40888.3
363	33.0734	2020-07-25 12:26:01	2020-07-25 12:26:01	45711.4
364	33.2879	2020-07-25 12:29:01	2020-07-25 12:29:01	46858.2
365	33.5453	2020-07-25 12:32:01	2020-07-25 12:32:01	42168.3
366	33.5453	2020-07-25 12:35:01	2020-07-25 12:35:01	43581.4
367	33.5024	2020-07-25 12:38:01	2020-07-25 12:38:01	40826.9
368	33.5024	2020-07-25 12:41:01	2020-07-25 12:41:01	38604.8
369	33.2879	2020-07-25 12:44:01	2020-07-25 12:44:01	36608
370	32.9876	2020-07-25 12:47:01	2020-07-25 12:47:01	36730.9
371	32.6873	2020-07-25 12:50:01	2020-07-25 12:50:01	40560.6
372	32.6015	2020-07-25 12:53:01	2020-07-25 12:53:01	40028.2
373	32.4299	2020-07-25 12:56:01	2020-07-25 12:56:01	38871
374	32.2583	2020-07-25 12:59:01	2020-07-25 12:59:01	33853.4
375	32.0438	2020-07-25 13:02:01	2020-07-25 13:02:01	34324.5
376	31.6577	2020-07-25 13:05:01	2020-07-25 13:05:01	29767.7
377	31.529	2020-07-25 13:08:01	2020-07-25 13:08:01	40806.4
378	31.1429	2020-07-25 13:11:01	2020-07-25 13:11:01	23705.6
379	31.0142	2020-07-25 13:14:01	2020-07-25 13:14:01	32512
380	31.2716	2020-07-25 13:17:01	2020-07-25 13:17:01	36935.7
381	31.4861	2020-07-25 13:20:01	2020-07-25 13:20:01	41185.3
382	31.4861	2020-07-25 13:23:01	2020-07-25 13:23:01	40540.2
383	31.4432	2020-07-25 13:26:01	2020-07-25 13:26:01	40908.8
384	31.0571	2020-07-25 13:29:01	2020-07-25 13:29:01	23500.8
385	30.9713	2020-07-25 13:32:01	2020-07-25 13:32:01	26460.2
386	31.2716	2020-07-25 13:35:01	2020-07-25 13:35:01	40202.2
387	31.4861	2020-07-25 13:38:01	2020-07-25 13:38:01	37806.1
388	31.6577	2020-07-25 13:41:01	2020-07-25 13:41:01	47063
389	31.7006	2020-07-25 13:44:01	2020-07-25 13:44:01	36945.9
390	31.7006	2020-07-25 13:47:01	2020-07-25 13:47:01	38338.6
391	31.7006	2020-07-25 13:50:01	2020-07-25 13:50:01	42127.4
392	31.6148	2020-07-25 13:53:01	2020-07-25 13:53:01	29870.1
393	31.529	2020-07-25 13:56:01	2020-07-25 13:56:01	26777.6
394	31.6577	2020-07-25 13:59:01	2020-07-25 13:59:01	33341.4
395	31.7864	2020-07-25 14:02:01	2020-07-25 14:02:01	39116.8
396	31.958	2020-07-25 14:05:01	2020-07-25 14:05:01	41482.2
397	32.0438	2020-07-25 14:08:01	2020-07-25 14:08:01	34232.3
398	31.958	2020-07-25 14:11:01	2020-07-25 14:11:01	32389.1
399	31.9151	2020-07-25 14:14:01	2020-07-25 14:14:01	34560
400	31.8293	2020-07-25 14:17:01	2020-07-25 14:17:01	28047.4
401	31.7435	2020-07-25 14:20:01	2020-07-25 14:20:01	28293.1
402	31.7864	2020-07-25 14:23:01	2020-07-25 14:23:01	29726.7
403	31.529	2020-07-25 14:26:01	2020-07-25 14:26:01	18621.4
404	31.4861	2020-07-25 14:29:01	2020-07-25 14:29:01	19312.6
405	31.4861	2020-07-25 14:32:01	2020-07-25 14:32:01	22190.1
406	31.529	2020-07-25 14:35:01	2020-07-25 14:35:01	21360.6
407	31.6148	2020-07-25 14:38:01	2020-07-25 14:38:01	25159.7
408	31.4861	2020-07-25 14:41:01	2020-07-25 14:41:01	17740.8
409	31.2716	2020-07-25 14:44:01	2020-07-25 14:44:01	17269.8
410	31.0571	2020-07-25 14:47:01	2020-07-25 14:47:01	20321.3
411	30.9713	2020-07-25 14:50:01	2020-07-25 14:50:01	20265
412	30.9713	2020-07-25 14:53:01	2020-07-25 14:53:01	28672
413	30.9284	2020-07-25 14:56:01	2020-07-25 14:56:01	26378.2
414	30.7568	2020-07-25 14:59:01	2020-07-25 14:59:01	17326.1
415	30.7139	2020-07-25 15:02:01	2020-07-25 15:02:01	20633.6
416	30.7997	2020-07-25 15:05:01	2020-07-25 15:05:01	20280.3
417	30.671	2020-07-25 15:08:01	2020-07-25 15:08:01	17786.9
418	30.7568	2020-07-25 15:11:01	2020-07-25 15:11:01	23439.4
419	30.7568	2020-07-25 15:14:01	2020-07-25 15:14:01	25251.8
420	30.7139	2020-07-25 15:17:01	2020-07-25 15:17:01	23838.7
421	30.5852	2020-07-25 15:20:01	2020-07-25 15:20:01	21903.4
422	30.4136	2020-07-25 15:23:01	2020-07-25 15:23:01	17776.6
423	30.4994	2020-07-25 15:26:01	2020-07-25 15:26:01	23040
424	30.3707	2020-07-25 15:29:01	2020-07-25 15:29:01	18304
425	30.2849	2020-07-25 15:32:01	2020-07-25 15:32:01	12902.4
426	30.2849	2020-07-25 15:35:01	2020-07-25 15:35:01	14346.2
427	30.4136	2020-07-25 15:38:01	2020-07-25 15:38:01	18974.7
428	30.4565	2020-07-25 15:41:01	2020-07-25 15:41:01	17075.2
429	30.4994	2020-07-25 15:44:01	2020-07-25 15:44:01	17628.2
430	30.5852	2020-07-25 15:47:01	2020-07-25 15:47:01	18437.1
431	30.4565	2020-07-25 15:50:01	2020-07-25 15:50:01	15723.5
432	30.5423	2020-07-25 15:53:01	2020-07-25 15:53:01	19865.6
433	30.4994	2020-07-25 15:56:01	2020-07-25 15:56:01	19328
434	30.4994	2020-07-25 15:59:01	2020-07-25 15:59:01	19763.2
435	30.4994	2020-07-25 16:02:01	2020-07-25 16:02:01	19138.6
436	30.4994	2020-07-25 16:05:01	2020-07-25 16:05:01	19840
437	30.5423	2020-07-25 16:08:01	2020-07-25 16:08:01	20428.8
438	30.5423	2020-07-25 16:11:01	2020-07-25 16:11:01	22087.7
439	30.5423	2020-07-25 16:14:01	2020-07-25 16:14:01	20203.5
440	30.4994	2020-07-25 16:17:01	2020-07-25 16:17:01	20710.4
441	30.4994	2020-07-25 16:20:01	2020-07-25 16:20:01	20162.6
442	30.4136	2020-07-25 16:23:01	2020-07-25 16:23:01	15011.8
443	30.2849	2020-07-25 16:26:01	2020-07-25 16:26:01	11985.9
444	30.4565	2020-07-25 16:29:01	2020-07-25 16:29:01	21309.4
445	30.6281	2020-07-25 16:32:01	2020-07-25 16:32:01	27873.3
446	30.671	2020-07-25 16:35:01	2020-07-25 16:35:01	22036.5
447	30.5423	2020-07-25 16:38:01	2020-07-25 16:38:01	17745.9
448	30.5852	2020-07-25 16:41:01	2020-07-25 16:41:01	15959
449	30.5423	2020-07-25 16:44:01	2020-07-25 16:44:01	13706.2
450	30.7139	2020-07-25 16:47:01	2020-07-25 16:47:01	23111.7
451	30.7139	2020-07-25 16:50:01	2020-07-25 16:50:01	17264.6
452	30.7997	2020-07-25 16:53:01	2020-07-25 16:53:01	16020.5
453	30.8855	2020-07-25 16:56:01	2020-07-25 16:56:01	12753.9
454	30.8426	2020-07-25 16:59:01	2020-07-25 16:59:01	10854.4
455	30.9284	2020-07-25 17:02:01	2020-07-25 17:02:01	9871.36
456	31.0571	2020-07-25 17:05:01	2020-07-25 17:05:01	9556.48
457	31.1429	2020-07-25 17:08:01	2020-07-25 17:08:01	8832
458	31.2716	2020-07-25 17:11:01	2020-07-25 17:11:01	8706.56
459	31.4003	2020-07-25 17:14:01	2020-07-25 17:14:01	8893.44
460	31.529	2020-07-25 17:17:01	2020-07-25 17:17:01	9011.2
461	31.4861	2020-07-25 17:20:01	2020-07-25 17:20:01	8181.76
462	31.529	2020-07-25 17:23:01	2020-07-25 17:23:01	9251.84
463	31.529	2020-07-25 17:26:01	2020-07-25 17:26:01	8573.44
464	31.4861	2020-07-25 17:29:01	2020-07-25 17:29:01	7444.48
465	31.4861	2020-07-25 17:32:01	2020-07-25 17:32:01	7127.04
466	31.4861	2020-07-25 17:35:01	2020-07-25 17:35:01	6353.92
467	31.4861	2020-07-25 17:38:01	2020-07-25 17:38:01	5516.8
468	31.4861	2020-07-25 17:41:01	2020-07-25 17:41:01	6510.08
469	31.529	2020-07-25 17:44:01	2020-07-25 17:44:01	5724.16
470	31.4432	2020-07-25 17:47:01	2020-07-25 17:47:01	7329.28
471	31.4861	2020-07-25 17:50:01	2020-07-25 17:50:01	8573.44
472	31.529	2020-07-25 17:53:01	2020-07-25 17:53:01	9886.72
473	31.529	2020-07-25 17:56:01	2020-07-25 17:56:01	8471.04
474	31.529	2020-07-25 17:59:01	2020-07-25 17:59:01	9018.88
475	31.4861	2020-07-25 18:02:01	2020-07-25 18:02:01	6830.08
476	31.3574	2020-07-25 18:05:01	2020-07-25 18:05:01	5306.88
477	31.2716	2020-07-25 18:08:01	2020-07-25 18:08:01	4704
478	31.1429	2020-07-25 18:11:01	2020-07-25 18:11:01	4364.8
479	31.1429	2020-07-25 18:14:01	2020-07-25 18:14:01	3790.08
480	31.1	2020-07-25 18:17:01	2020-07-25 18:17:01	3530.24
481	31.0142	2020-07-25 18:20:01	2020-07-25 18:20:01	3139.84
482	30.9284	2020-07-25 18:23:01	2020-07-25 18:23:01	2760.96
483	30.8855	2020-07-25 18:26:01	2020-07-25 18:26:01	2385.28
484	30.8855	2020-07-25 18:29:01	2020-07-25 18:29:01	2084.48
485	30.7568	2020-07-25 18:32:01	2020-07-25 18:32:01	1736.96
486	30.7139	2020-07-25 18:35:01	2020-07-25 18:35:01	1396.48
487	30.671	2020-07-25 18:38:01	2020-07-25 18:38:01	1055.04
488	30.6281	2020-07-25 18:41:01	2020-07-25 18:41:01	765.76
489	30.5852	2020-07-25 18:44:01	2020-07-25 18:44:01	514.72
490	30.5423	2020-07-25 18:47:01	2020-07-25 18:47:01	72.6

## Sheet: XLSTAT_20240408_132640_1_HID
600	0	0	0	0
700	0	2.4	1.9	8.7
800	39	4	0.7	1.7
900	38	3.8	3.1	6.3
1000	77.9	4.2	0	3.4
1100	84.8	0	18.2	2.2
1200	0	1.7	15.2	1.1
1300	0	2	9.9	3.2
1400	0	3.1	2.3	2.7
1500	0	3.1	0.9	2.5
1600	0	1.8	1.1	2.7
1700	0	0	0	2.6
1800	0	0	0	1

## Sheet: XLSTAT_20240408_132517_1_HID
	0	0	0	0	0	0	0	0	0	0	0	0	0	0	0	0
	0	0.0403443	0	0.0403443	0	0.357782	0	0.357782	0	0.200321	0	0.200321	0	0.174825	0	0.174825
	0.0426866	0.0403443	17.16	0.0403443	0.0021393	0.357782	0.86	0.357782	0.00955224	0.200321	3.84	0.200321	0.00437811	0.174825	1.76	0.174825
	0.0426866	0	17.16	0	0.0021393	0	0.86	0	0.00955224	0	3.84	0	0.00437811	0	1.76	0
	0.0853731	0	17.16	0	0.00427861	0	0.86	0.0894454	0.0191045	0	3.84	0	0.00875622	0	1.76	0.305944
	0.0853731	0.0403443	34.32	0	0.00427861	0.357782	1.72	0.0894454	0.0191045	0.200321	7.68	0	0.00875622	0.174825	3.52	0.305944
	0.12806	0.0403443	34.32	0	0.00641791	0.357782	1.72	0	0.0286567	0.200321	7.68	0	0.0131343	0.174825	3.52	0
	0.12806	0	34.32	0.00896539	0.00641791	0	1.72	0.268336	0.0286567	0	7.68	0.0200321	0.0131343	0	3.52	0
	0.170746	0	51.48	0.00896539	0.00855721	0	2.58	0.268336	0.038209	0	11.52	0.0200321	0.0175124	0	5.28	0
	0.170746	0.0403443	51.48	0	0.00855721	0.357782	2.58	0	0.038209	0.200321	11.52	0	0.0175124	0.174825	5.28	0
	0.213433	0.0403443	51.48	0	0.0106965	0.357782	2.58	0.178891	0.0477612	0.200321	11.52	0.0200321	0.0218905	0.174825	5.28	0.0437063
	0.213433	0	68.64	0	0.0106965	0	3.44	0.178891	0.0477612	0	15.36	0.0200321	0.0218905	0	7.04	0.0437063
	0.256119	0	68.64	0	0.0128358	0	3.44	0	0.0573134	0	15.36	0	0.0262687	0	7.04	0
	0.256119	0.0403443	68.64	0.00896539	0.0128358	0.357782	3.44	0.268336	0.0573134	0.200321	15.36	0.0200321	0.0262687	0.174825	7.04	0.0437063
	0.298806	0.0403443	85.8	0.00896539	0.0149751	0.357782	4.3	0.268336	0.0668657	0.200321	19.2	0.0200321	0.0306468	0.174825	8.8	0.0437063
	0.298806	0	85.8	0	0.0149751	0	4.3	0	0.0668657	0	19.2	0	0.0306468	0	8.8	0
	0.341493	0			0.0171144	0			0.0764179	0			0.0350249	0
	0.341493	0.0403443			0.0171144	0.357782			0.0764179	0.200321			0.0350249	0.174825
	0.384179	0.0403443			0.0192537	0.357782			0.0859701	0.200321			0.039403	0.174825
	0.384179	0			0.0192537	0			0.0859701	0			0.039403	0
	0.426866	0			0.021393	0			0.0955224	0			0.0437811	0
	0.426866	0.0403443			0.021393	0.357782			0.0955224	0.200321			0.0437811	0.174825
	0.469552	0.0403443			0.0235323	0.357782			0.105075	0.200321			0.0481592	0.174825
	0.469552	0			0.0235323	0			0.105075	0			0.0481592	0
	0.512239	0			0.0256716	0			0.114627	0			0.0525373	0
	0.512239	0.0403443			0.0256716	0.357782			0.114627	0.200321			0.0525373	0.174825
	0.554925	0.0403443			0.0278109	0.357782			0.124179	0.200321			0.0569154	0.174825
	0.554925	0			0.0278109	0			0.124179	0			0.0569154	0
	0.597612	0			0.0299502	0			0.133731	0			0.0612935	0
	0.597612	0.0403443			0.0299502	0.357782			0.133731	0.200321			0.0612935	0.174825
	0.640299	0.0403443			0.0320896	0.357782			0.143284	0.200321			0.0656716	0.174825
	0.640299	0			0.0320896	0			0.143284	0			0.0656716	0
	0.682985	0			0.0342289	0			0.152836	0			0.0700498	0
	0.682985	0.0403443			0.0342289	0.357782			0.152836	0.200321			0.0700498	0.174825
	0.725672	0.0403443			0.0363682	0.357782			0.162388	0.200321			0.0744279	0.174825
	0.725672	0			0.0363682	0			0.162388	0			0.0744279	0
	0.768358	0			0.0385075	0			0.17194	0			0.078806	0
	0.768358	0.0403443			0.0385075	0.357782			0.17194	0.200321			0.078806	0.174825
	0.811045	0.0403443			0.0406468	0.357782			0.181493	0.200321			0.0831841	0.174825
	0.811045	0			0.0406468	0			0.181493	0			0.0831841	0
	0.853731	0			0.0427861	0			0.191045	0			0.0875622	0
	0.853731	0.0403443			0.0427861	0.357782			0.191045	0.200321			0.0875622	0.174825
	0.896418	0.0403443			0.0449254	0.357782			0.200597	0.200321			0.0919403	0.174825
	0.896418	0			0.0449254	0			0.200597	0			0.0919403	0
	0.939104	0			0.0470647	0			0.210149	0			0.0963184	0
	0.939104	0.0403443			0.0470647	0.357782			0.210149	0.200321			0.0963184	0.174825
	0.981791	0.0403443			0.049204	0.357782			0.219701	0.200321			0.100697	0.174825
	0.981791	0			0.049204	0			0.219701	0			0.100697	0
	1.02448	0			0.0513433	0			0.229254	0			0.105075	0
	1.02448	0.0403443			0.0513433	0.357782			0.229254	0.200321			0.105075	0.174825
	1.06716	0.0403443			0.0534826	0.357782			0.238806	0.200321			0.109453	0.174825
	1.06716	0			0.0534826	0			0.238806	0			0.109453	0
	1.10985	0			0.0556219	0			0.248358	0			0.113831	0
	1.10985	0.0403443			0.0556219	0.357782			0.248358	0.200321			0.113831	0.174825
	1.15254	0.0403443			0.0577612	0.357782			0.25791	0.200321			0.118209	0.174825
	1.15254	0			0.0577612	0			0.25791	0			0.118209	0
	1.19522	0			0.0599005	0			0.267463	0			0.122587	0
	1.19522	0.0403443			0.0599005	0.357782			0.267463	0.200321			0.122587	0.174825
	1.23791	0.0403443			0.0620398	0.357782			0.277015	0.200321			0.126965	0.174825
	1.23791	0			0.0620398	0			0.277015	0			0.126965	0
	1.2806	0			0.0641791	0			0.286567	0			0.131343	0
	1.2806	0.0403443			0.0641791	0.357782			0.286567	0.200321			0.131343	0.174825
	1.32328	0.0403443			0.0663184	0.357782			0.296119	0.200321			0.135721	0.174825
	1.32328	0			0.0663184	0			0.296119	0			0.135721	0
	1.36597	0			0.0684577	0			0.305672	0			0.1401	0
	1.36597	0.0403443			0.0684577	0.357782			0.305672	0.200321			0.1401	0.174825
	1.40866	0.0403443			0.070597	0.357782			0.315224	0.200321			0.144478	0.174825
	1.40866	0			0.070597	0			0.315224	0			0.144478	0
	1.45134	0			0.0727363	0			0.324776	0			0.148856	0
	1.45134	0.0403443			0.0727363	0.357782			0.324776	0.200321			0.148856	0.174825
	1.49403	0.0403443			0.0748756	0.357782			0.334328	0.200321			0.153234	0.174825
	1.49403	0			0.0748756	0			0.334328	0			0.153234	0
	1.53672	0			0.0770149	0			0.343881	0			0.157612	0
	1.53672	0.0403443			0.0770149	0.357782			0.343881	0.200321			0.157612	0.174825
	1.5794	0.0403443			0.0791542	0.357782			0.353433	0.200321			0.16199	0.174825
	1.5794	0			0.0791542	0			0.353433	0			0.16199	0
	1.62209	0			0.0812935	0			0.362985	0			0.166368	0
	1.62209	0.0403443			0.0812935	0.357782			0.362985	0.200321			0.166368	0.174825
	1.66478	0.0403443			0.0834328	0.357782			0.372537	0.200321			0.170746	0.174825
	1.66478	0			0.0834328	0			0.372537	0			0.170746	0
	1.70746	0			0.0855721	0			0.38209	0			0.175124	0
	1.70746	0.0403443			0.0855721	0.357782			0.38209	0.200321			0.175124	0.174825
	1.75015	0.0403443			0.0877114	0.357782			0.391642	0.200321			0.179502	0.174825
	1.75015	0			0.0877114	0			0.391642	0			0.179502	0
	1.79284	0			0.0898507	0			0.401194	0			0.183881	0
	1.79284	0.0403443			0.0898507	0.357782			0.401194	0.200321			0.183881	0.174825
	1.83552	0.0403443			0.09199	0.357782			0.410746	0.200321			0.188259	0.174825
	1.83552	0			0.09199	0			0.410746	0			0.188259	0
	1.87821	0			0.0941294	0			0.420299	0			0.192637	0
	1.87821	0.0403443			0.0941294	0.357782			0.420299	0.200321			0.192637	0.174825
	1.9209	0.0403443			0.0962687	0.357782			0.429851	0.200321			0.197015	0.174825
	1.9209	0			0.0962687	0			0.429851	0			0.197015	0
	1.96358	0			0.098408	0			0.439403	0			0.201393	0
	1.96358	0.0403443			0.098408	0.357782			0.439403	0.200321			0.201393	0.174825
	2.00627	0.0403443			0.100547	0.357782			0.448955	0.200321			0.205771	0.174825
	2.00627	0			0.100547	0			0.448955	0			0.205771	0
	2.04896	0			0.102687	0			0.458507	0			0.210149	0
	2.04896	0.0403443			0.102687	0.357782			0.458507	0.200321			0.210149	0.174825
	2.09164	0.0403443			0.104826	0.357782			0.46806	0.200321			0.214527	0.174825
	2.09164	0			0.104826	0			0.46806	0			0.214527	0
	2.13433	0			0.106965	0			0.477612	0			0.218905	0
	2.13433	0.0403443			0.106965	0.357782			0.477612	0.200321			0.218905	0.174825
	2.17701	0.0403443			0.109104	0.357782			0.487164	0.200321			0.223284	0.174825
	2.17701	0			0.109104	0			0.487164	0			0.223284	0
	2.2197	0			0.111244	0			0.496716	0			0.227662	0
	2.2197	0.0403443			0.111244	0.357782			0.496716	0.200321			0.227662	0.174825
	2.26239	0.0403443			0.113383	0.357782			0.506269	0.200321			0.23204	0.174825
	2.26239	0			0.113383	0			0.506269	0			0.23204	0
	2.30507	0			0.115522	0			0.515821	0			0.236418	0
	2.30507	0.0403443			0.115522	0.357782			0.515821	0.200321			0.236418	0.174825
	2.34776	0.0403443			0.117662	0.357782			0.525373	0.200321			0.240796	0.174825
	2.34776	0			0.117662	0			0.525373	0			0.240796	0
	2.39045	0			0.119801	0			0.534925	0			0.245174	0
	2.39045	0.0403443			0.119801	0.357782			0.534925	0.200321			0.245174	0.174825
	2.43313	0.0403443			0.12194	0.357782			0.544478	0.200321			0.249552	0.174825
	2.43313	0			0.12194	0			0.544478	0			0.249552	0
	2.47582	0			0.12408	0			0.55403	0			0.25393	0
	2.47582	0.0403443			0.12408	0.357782			0.55403	0.200321			0.25393	0.174825
	2.51851	0.0403443			0.126219	0.357782			0.563582	0.200321			0.258308	0.174825
	2.51851	0			0.126219	0			0.563582	0			0.258308	0
	2.56119	0			0.128358	0			0.573134	0			0.262687	0
	2.56119	0.0403443			0.128358	0.357782			0.573134	0.200321			0.262687	0.174825
	2.60388	0.0403443			0.130498	0.357782			0.582687	0.200321			0.267065	0.174825
	2.60388	0			0.130498	0			0.582687	0			0.267065	0
	2.64657	0			0.132637	0			0.592239	0			0.271443	0
	2.64657	0.0403443			0.132637	0.357782			0.592239	0.200321			0.271443	0.174825
	2.68925	0.0403443			0.134776	0.357782			0.601791	0.200321			0.275821	0.174825
	2.68925	0			0.134776	0			0.601791	0			0.275821	0
	2.73194	0			0.136915	0			0.611343	0			0.280199	0
	2.73194	0.0403443			0.136915	0.357782			0.611343	0.200321			0.280199	0.174825
	2.77463	0.0403443			0.139055	0.357782			0.620896	0.200321			0.284577	0.174825
	2.77463	0			0.139055	0			0.620896	0			0.284577	0
	2.81731	0			0.141194	0			0.630448	0			0.288955	0
	2.81731	0.0403443			0.141194	0.357782			0.630448	0.200321			0.288955	0.174825
	2.86	0.0403443			0.143333	0.357782			0.64	0.200321			0.293333	0.174825
	2.86	0			0.143333	0			0.64	0			0.293333	0
	2.90269	0			0.145473	0			0.649552	0			0.297711	0
	2.90269	0.0403443			0.145473	0.357782			0.649552	0.200321			0.297711	0.174825
	2.94537	0.0403443			0.147612	0.357782			0.659104	0.200321			0.30209	0.174825
	2.94537	0			0.147612	0			0.659104	0			0.30209	0
	2.98806	0			0.149751	0			0.668657	0			0.306468	0
	2.98806	0.0403443			0.149751	0.357782			0.668657	0.200321			0.306468	0.174825
	3.03075	0.0403443			0.151891	0.357782			0.678209	0.200321			0.310846	0.174825
	3.03075	0			0.151891	0			0.678209	0			0.310846	0
	3.07343	0			0.15403	0			0.687761	0			0.315224	0
	3.07343	0.0403443			0.15403	0.357782			0.687761	0.200321			0.315224	0.174825
	3.11612	0.0403443			0.156169	0.357782			0.697313	0.200321			0.319602	0.174825
	3.11612	0			0.156169	0			0.697313	0			0.319602	0
	3.15881	0			0.158308	0			0.706866	0			0.32398	0
	3.15881	0.0403443			0.158308	0.357782			0.706866	0.200321			0.32398	0.174825
	3.20149	0.0403443			0.160448	0.357782			0.716418	0.200321			0.328358	0.174825
	3.20149	0			0.160448	0			0.716418	0			0.328358	0
	3.24418	0			0.162587	0			0.72597	0			0.332736	0
	3.24418	0.0403443			0.162587	0.357782			0.72597	0.200321			0.332736	0.174825
	3.28687	0.0403443			0.164726	0.357782			0.735522	0.200321			0.337114	0.174825
	3.28687	0			0.164726	0			0.735522	0			0.337114	0
	3.32955	0			0.166866	0			0.745075	0			0.341493	0
	3.32955	0.0403443			0.166866	0.357782			0.745075	0.200321			0.341493	0.174825
	3.37224	0.0403443			0.169005	0.357782			0.754627	0.200321			0.345871	0.174825
	3.37224	0			0.169005	0			0.754627	0			0.345871	0
	3.41493	0			0.171144	0			0.764179	0			0.350249	0
	3.41493	0.0403443			0.171144	0.357782			0.764179	0.200321			0.350249	0.174825
	3.45761	0.0403443			0.173284	0.357782			0.773731	0.200321			0.354627	0.174825
	3.45761	0			0.173284	0			0.773731	0			0.354627	0
	3.5003	0			0.175423	0			0.783284	0			0.359005	0
	3.5003	0.0403443			0.175423	0.357782			0.783284	0.200321			0.359005	0.174825
	3.54299	0.0403443			0.177562	0.357782			0.792836	0.200321			0.363383	0.174825
	3.54299	0			0.177562	0			0.792836	0			0.363383	0
	3.58567	0			0.179701	0			0.802388	0			0.367761	0
	3.58567	0.0403443			0.179701	0.357782			0.802388	0.200321			0.367761	0.174825
	3.62836	0.0403443			0.181841	0.357782			0.81194	0.200321			0.372139	0.174825
	3.62836	0			0.181841	0			0.81194	0			0.372139	0
	3.67104	0			0.18398	0			0.821493	0			0.376517	0
	3.67104	0.0403443			0.18398	0.357782			0.821493	0.200321			0.376517	0.174825
	3.71373	0.0403443			0.186119	0.357782			0.831045	0.200321			0.380896	0.174825
	3.71373	0			0.186119	0			0.831045	0			0.380896	0
	3.75642	0			0.188259	0			0.840597	0			0.385274	0
	3.75642	0.0403443			0.188259	0.357782			0.840597	0.200321			0.385274	0.174825
	3.7991	0.0403443			0.190398	0.357782			0.850149	0.200321			0.389652	0.174825
	3.7991	0			0.190398	0			0.850149	0			0.389652	0
	3.84179	0			0.192537	0			0.859701	0			0.39403	0
	3.84179	0.0403443			0.192537	0.357782			0.859701	0.200321			0.39403	0.174825
	3.88448	0.0403443			0.194677	0.357782			0.869254	0.200321			0.398408	0.174825
	3.88448	0			0.194677	0			0.869254	0			0.398408	0
	3.92716	0			0.196816	0			0.878806	0			0.402786	0
	3.92716	0.0403443			0.196816	0.357782			0.878806	0.200321			0.402786	0.174825
	3.96985	0.0403443			0.198955	0.357782			0.888358	0.200321			0.407164	0.174825
	3.96985	0			0.198955	0			0.888358	0			0.407164	0
	4.01254	0			0.201095	0			0.89791	0			0.411542	0
	4.01254	0.0403443			0.201095	0.357782			0.89791	0.200321			0.411542	0.174825
	4.05522	0.0403443			0.203234	0.357782			0.907463	0.200321			0.41592	0.174825
	4.05522	0			0.203234	0			0.907463	0			0.41592	0
	4.09791	0			0.205373	0			0.917015	0			0.420299	0
	4.09791	0.0403443			0.205373	0.357782			0.917015	0.200321			0.420299	0.174825
	4.1406	0.0403443			0.207512	0.357782			0.926567	0.200321			0.424677	0.174825
	4.1406	0			0.207512	0			0.926567	0			0.424677	0
	4.18328	0			0.209652	0			0.936119	0			0.429055	0
	4.18328	0.0403443			0.209652	0.357782			0.936119	0.200321			0.429055	0.174825
	4.22597	0.0403443			0.211791	0.357782			0.945672	0.200321			0.433433	0.174825
	4.22597	0			0.211791	0			0.945672	0			0.433433	0
	4.26866	0			0.21393	0			0.955224	0			0.437811	0
	4.26866	0.0403443			0.21393	0.357782			0.955224	0.200321			0.437811	0.174825
	4.31134	0.0403443			0.21607	0.357782			0.964776	0.200321			0.442189	0.174825
	4.31134	0			0.21607	0			0.964776	0			0.442189	0
	4.35403	0			0.218209	0			0.974328	0			0.446567	0
	4.35403	0.0403443			0.218209	0.357782			0.974328	0.200321			0.446567	0.174825
	4.39672	0.0403443			0.220348	0.357782			0.983881	0.200321			0.450945	0.174825
	4.39672	0			0.220348	0			0.983881	0			0.450945	0
	4.4394	0			0.222488	0			0.993433	0			0.455323	0
	4.4394	0.0403443			0.222488	0.357782			0.993433	0.200321			0.455323	0.174825
	4.48209	0.0403443			0.224627	0.357782			1.00299	0.200321			0.459701	0.174825
	4.48209	0			0.224627	0			1.00299	0			0.459701	0
	4.52478	0			0.226766	0			1.01254	0			0.46408	0
	4.52478	0.0403443			0.226766	0.357782			1.01254	0.200321			0.46408	0.174825
	4.56746	0.0403443			0.228905	0.357782			1.02209	0.200321			0.468458	0.174825
	4.56746	0			0.228905	0			1.02209	0			0.468458	0
	4.61015	0			0.231045	0			1.03164	0			0.472836	0
	4.61015	0.0403443			0.231045	0.357782			1.03164	0.200321			0.472836	0.174825
	4.65284	0.0403443			0.233184	0.357782			1.04119	0.200321			0.477214	0.174825
	4.65284	0			0.233184	0			1.04119	0			0.477214	0
	4.69552	0			0.235323	0			1.05075	0			0.481592	0
	4.69552	0.0403443			0.235323	0.357782			1.05075	0.200321			0.481592	0.174825
	4.73821	0.0403443			0.237463	0.357782			1.0603	0.200321			0.48597	0.174825
	4.73821	0			0.237463	0			1.0603	0			0.48597	0
	4.7809	0			0.239602	0			1.06985	0			0.490348	0
	4.7809	0.0403443			0.239602	0.357782			1.06985	0.200321			0.490348	0.174825
	4.82358	0.0403443			0.241741	0.357782			1.0794	0.200321			0.494726	0.174825
	4.82358	0			0.241741	0			1.0794	0			0.494726	0
	4.86627	0			0.243881	0			1.08896	0			0.499104	0
	4.86627	0.0403443			0.243881	0.357782			1.08896	0.200321			0.499104	0.174825
	4.90896	0.0403443			0.24602	0.357782			1.09851	0.200321			0.503483	0.174825
	4.90896	0			0.24602	0			1.09851	0			0.503483	0
	4.95164	0			0.248159	0			1.10806	0			0.507861	0
	4.95164	0.0403443			0.248159	0.357782			1.10806	0.200321			0.507861	0.174825
	4.99433	0.0403443			0.250299	0.357782			1.11761	0.200321			0.512239	0.174825
	4.99433	0			0.250299	0			1.11761	0			0.512239	0
	5.03701	0			0.252438	0			1.12716	0			0.516617	0
	5.03701	0.0403443			0.252438	0.357782			1.12716	0.200321			0.516617	0.174825
	5.0797	0.0403443			0.254577	0.357782			1.13672	0.200321			0.520995	0.174825
	5.0797	0			0.254577	0			1.13672	0			0.520995	0
	5.12239	0			0.256716	0			1.14627	0			0.525373	0
	5.12239	0.0403443			0.256716	0.357782			1.14627	0.200321			0.525373	0.174825
	5.16507	0.0403443			0.258856	0.357782			1.15582	0.200321			0.529751	0.174825
	5.16507	0			0.258856	0			1.15582	0			0.529751	0
	5.20776	0			0.260995	0			1.16537	0			0.534129	0
	5.20776	0.0403443			0.260995	0.357782			1.16537	0.200321			0.534129	0.174825
	5.25045	0.0403443			0.263134	0.357782			1.17493	0.200321			0.538507	0.174825
	5.25045	0			0.263134	0			1.17493	0			0.538507	0
	5.29313	0			0.265274	0			1.18448	0			0.542886	0
	5.29313	0.0403443			0.265274	0.357782			1.18448	0.200321			0.542886	0.174825
	5.33582	0.0403443			0.267413	0.357782			1.19403	0.200321			0.547264	0.174825
	5.33582	0			0.267413	0			1.19403	0			0.547264	0
	5.37851	0			0.269552	0			1.20358	0			0.551642	0
	5.37851	0.0403443			0.269552	0.357782			1.20358	0.200321			0.551642	0.174825
	5.42119	0.0403443			0.271692	0.357782			1.21313	0.200321			0.55602	0.174825
	5.42119	0			0.271692	0			1.21313	0			0.55602	0
	5.46388	0			0.273831	0			1.22269	0			0.560398	0
	5.46388	0.0403443			0.273831	0.357782			1.22269	0.200321			0.560398	0.174825
	5.50657	0.0403443			0.27597	0.357782			1.23224	0.200321			0.564776	0.174825
	5.50657	0			0.27597	0			1.23224	0			0.564776	0
	5.54925	0			0.278109	0			1.24179	0			0.569154	0
	5.54925	0.0403443			0.278109	0.357782			1.24179	0.200321			0.569154	0.174825
	5.59194	0.0403443			0.280249	0.357782			1.25134	0.200321			0.573532	0.174825
	5.59194	0			0.280249	0			1.25134	0			0.573532	0
	5.63463	0			0.282388	0			1.2609	0			0.57791	0
	5.63463	0.0403443			0.282388	0.357782			1.2609	0.200321			0.57791	0.174825
	5.67731	0.0403443			0.284527	0.357782			1.27045	0.200321			0.582289	0.174825
	5.67731	0			0.284527	0			1.27045	0			0.582289	0
	5.72	0			0.286667	0			1.28	0			0.586667	0
	5.72	0.0403443			0.286667	0.357782			1.28	0.200321			0.586667	0.174825
	5.76269	0.0403443			0.288806	0.357782			1.28955	0.200321			0.591045	0.174825
	5.76269	0			0.288806	0			1.28955	0			0.591045	0
	5.80537	0			0.290945	0			1.2991	0			0.595423	0
	5.80537	0.0403443			0.290945	0.357782			1.2991	0.200321			0.595423	0.174825
	5.84806	0.0403443			0.293085	0.357782			1.30866	0.200321			0.599801	0.174825
	5.84806	0			0.293085	0			1.30866	0			0.599801	0
	5.89075	0			0.295224	0			1.31821	0			0.604179	0
	5.89075	0.0403443			0.295224	0.357782			1.31821	0.200321			0.604179	0.174825
	5.93343	0.0403443			0.297363	0.357782			1.32776	0.200321			0.608557	0.174825
	5.93343	0			0.297363	0			1.32776	0			0.608557	0
	5.97612	0			0.299502	0			1.33731	0			0.612935	0
	5.97612	0.0403443			0.299502	0.357782			1.33731	0.200321			0.612935	0.174825
	6.01881	0.0403443			0.301642	0.357782			1.34687	0.200321			0.617313	0.174825
	6.01881	0			0.301642	0			1.34687	0			0.617313	0
	6.06149	0			0.303781	0			1.35642	0			0.621692	0
	6.06149	0.0403443			0.303781	0.357782			1.35642	0.200321			0.621692	0.174825
	6.10418	0.0403443			0.30592	0.357782			1.36597	0.200321			0.62607	0.174825
	6.10418	0			0.30592	0			1.36597	0			0.62607	0
	6.14687	0			0.30806	0			1.37552	0			0.630448	0
	6.14687	0.0403443			0.30806	0.357782			1.37552	0.200321			0.630448	0.174825
	6.18955	0.0403443			0.310199	0.357782			1.38507	0.200321			0.634826	0.174825
	6.18955	0			0.310199	0			1.38507	0			0.634826	0
	6.23224	0			0.312338	0			1.39463	0			0.639204	0
	6.23224	0.0403443			0.312338	0.357782			1.39463	0.200321			0.639204	0.174825
	6.27493	0.0403443			0.314478	0.357782			1.40418	0.200321			0.643582	0.174825
	6.27493	0			0.314478	0			1.40418	0			0.643582	0
	6.31761	0			0.316617	0			1.41373	0			0.64796	0
	6.31761	0.0403443			0.316617	0.357782			1.41373	0.200321			0.64796	0.174825
	6.3603	0.0403443			0.318756	0.357782			1.42328	0.200321			0.652338	0.174825
	6.3603	0			0.318756	0			1.42328	0			0.652338	0
	6.40299	0			0.320896	0			1.43284	0			0.656716	0
	6.40299	0.0403443			0.320896	0.357782			1.43284	0.200321			0.656716	0.174825
	6.44567	0.0403443			0.323035	0.357782			1.44239	0.200321			0.661095	0.174825
	6.44567	0			0.323035	0			1.44239	0			0.661095	0
	6.48836	0			0.325174	0			1.45194	0			0.665473	0
	6.48836	0.0403443			0.325174	0.357782			1.45194	0.200321			0.665473	0.174825
	6.53104	0.0403443			0.327313	0.357782			1.46149	0.200321			0.669851	0.174825
	6.53104	0			0.327313	0			1.46149	0			0.669851	0
	6.57373	0			0.329453	0			1.47104	0			0.674229	0
	6.57373	0.0403443			0.329453	0.357782			1.47104	0.200321			0.674229	0.174825
	6.61642	0.0403443			0.331592	0.357782			1.4806	0.200321			0.678607	0.174825
	6.61642	0			0.331592	0			1.4806	0			0.678607	0
	6.6591	0			0.333731	0			1.49015	0			0.682985	0
	6.6591	0.0403443			0.333731	0.357782			1.49015	0.200321			0.682985	0.174825
	6.70179	0.0403443			0.335871	0.357782			1.4997	0.200321			0.687363	0.174825
	6.70179	0			0.335871	0			1.4997	0			0.687363	0
	6.74448	0			0.33801	0			1.50925	0			0.691741	0
	6.74448	0.0403443			0.33801	0.357782			1.50925	0.200321			0.691741	0.174825
	6.78716	0.0403443			0.340149	0.357782			1.51881	0.200321			0.696119	0.174825
	6.78716	0			0.340149	0			1.51881	0			0.696119	0
	6.82985	0			0.342289	0			1.52836	0			0.700498	0
	6.82985	0.0403443			0.342289	0.357782			1.52836	0.200321			0.700498	0.174825
	6.87254	0.0403443			0.344428	0.357782			1.53791	0.200321			0.704876	0.174825
	6.87254	0			0.344428	0			1.53791	0			0.704876	0
	6.91522	0			0.346567	0			1.54746	0			0.709254	0
	6.91522	0.0403443			0.346567	0.357782			1.54746	0.200321			0.709254	0.174825
	6.95791	0.0403443			0.348706	0.357782			1.55701	0.200321			0.713632	0.174825
	6.95791	0			0.348706	0			1.55701	0			0.713632	0
	7.0006	0			0.350846	0			1.56657	0			0.71801	0
	7.0006	0.0403443			0.350846	0.357782			1.56657	0.200321			0.71801	0.174825
	7.04328	0.0403443			0.352985	0.357782			1.57612	0.200321			0.722388	0.174825
	7.04328	0			0.352985	0			1.57612	0			0.722388	0
	7.08597	0			0.355124	0			1.58567	0			0.726766	0
	7.08597	0.0403443			0.355124	0.357782			1.58567	0.200321			0.726766	0.174825
	7.12866	0.0403443			0.357264	0.357782			1.59522	0.200321			0.731144	0.174825
	7.12866	0			0.357264	0			1.59522	0			0.731144	0
	7.17134	0			0.359403	0			1.60478	0			0.735522	0
	7.17134	0.0403443			0.359403	0.357782			1.60478	0.200321			0.735522	0.174825
	7.21403	0.0403443			0.361542	0.357782			1.61433	0.200321			0.7399	0.174825
	7.21403	0			0.361542	0			1.61433	0			0.7399	0
	7.25672	0			0.363682	0			1.62388	0			0.744279	0
	7.25672	0.0403443			0.363682	0.357782			1.62388	0.200321			0.744279	0.174825
	7.2994	0.0403443			0.365821	0.357782			1.63343	0.200321			0.748657	0.174825
	7.2994	0			0.365821	0			1.63343	0			0.748657	0
	7.34209	0			0.36796	0			1.64299	0			0.753035	0
	7.34209	0.0403443			0.36796	0.357782			1.64299	0.200321			0.753035	0.174825
	7.38478	0.0403443			0.3701	0.357782			1.65254	0.200321			0.757413	0.174825
	7.38478	0			0.3701	0			1.65254	0			0.757413	0
	7.42746	0			0.372239	0			1.66209	0			0.761791	0
	7.42746	0.0403443			0.372239	0.357782			1.66209	0.200321			0.761791	0.174825
	7.47015	0.0403443			0.374378	0.357782			1.67164	0.200321			0.766169	0.174825
	7.47015	0			0.374378	0			1.67164	0			0.766169	0
	7.51284	0			0.376517	0			1.68119	0			0.770547	0
	7.51284	0.0403443			0.376517	0.357782			1.68119	0.200321			0.770547	0.174825
	7.55552	0.0403443			0.378657	0.357782			1.69075	0.200321			0.774925	0.174825
	7.55552	0			0.378657	0			1.69075	0			0.774925	0
	7.59821	0			0.380796	0			1.7003	0			0.779303	0
	7.59821	0.0403443			0.380796	0.357782			1.7003	0.200321			0.779303	0.174825
	7.6409	0.0403443			0.382935	0.357782			1.70985	0.200321			0.783682	0.174825
	7.6409	0			0.382935	0			1.70985	0			0.783682	0
	7.68358	0			0.385075	0			1.7194	0			0.78806	0
	7.68358	0.0403443			0.385075	0.357782			1.7194	0.200321			0.78806	0.174825
	7.72627	0.0403443			0.387214	0.357782			1.72896	0.200321			0.792438	0.174825
	7.72627	0			0.387214	0			1.72896	0			0.792438	0
	7.76896	0			0.389353	0			1.73851	0			0.796816	0
	7.76896	0.0403443			0.389353	0.357782			1.73851	0.200321			0.796816	0.174825
	7.81164	0.0403443			0.391493	0.357782			1.74806	0.200321			0.801194	0.174825
	7.81164	0			0.391493	0			1.74806	0			0.801194	0
	7.85433	0			0.393632	0			1.75761	0			0.805572	0
	7.85433	0.0403443			0.393632	0.357782			1.75761	0.200321			0.805572	0.174825
	7.89701	0.0403443			0.395771	0.357782			1.76716	0.200321			0.80995	0.174825
	7.89701	0			0.395771	0			1.76716	0			0.80995	0
	7.9397	0			0.39791	0			1.77672	0			0.814328	0
	7.9397	0.0403443			0.39791	0.357782			1.77672	0.200321			0.814328	0.174825
	7.98239	0.0403443			0.40005	0.357782			1.78627	0.200321			0.818706	0.174825
	7.98239	0			0.40005	0			1.78627	0			0.818706	0
	8.02507	0			0.402189	0			1.79582	0			0.823085	0
	8.02507	0.0403443			0.402189	0.357782			1.79582	0.200321			0.823085	0.174825
	8.06776	0.0403443			0.404328	0.357782			1.80537	0.200321			0.827463	0.174825
	8.06776	0			0.404328	0			1.80537	0			0.827463	0
	8.11045	0			0.406468	0			1.81493	0			0.831841	0
	8.11045	0.0403443			0.406468	0.357782			1.81493	0.200321			0.831841	0.174825
	8.15313	0.0403443			0.408607	0.357782			1.82448	0.200321			0.836219	0.174825
	8.15313	0			0.408607	0			1.82448	0			0.836219	0
	8.19582	0			0.410746	0			1.83403	0			0.840597	0
	8.19582	0.0403443			0.410746	0.357782			1.83403	0.200321			0.840597	0.174825
	8.23851	0.0403443			0.412886	0.357782			1.84358	0.200321			0.844975	0.174825
	8.23851	0			0.412886	0			1.84358	0			0.844975	0
	8.28119	0			0.415025	0			1.85313	0			0.849353	0
	8.28119	0.0403443			0.415025	0.357782			1.85313	0.200321			0.849353	0.174825
	8.32388	0.0403443			0.417164	0.357782			1.86269	0.200321			0.853731	0.174825
	8.32388	0			0.417164	0			1.86269	0			0.853731	0
	8.36657	0			0.419303	0			1.87224	0			0.858109	0
	8.36657	0.0403443			0.419303	0.357782			1.87224	0.200321			0.858109	0.174825
	8.40925	0.0403443			0.421443	0.357782			1.88179	0.200321			0.862488	0.174825
	8.40925	0			0.421443	0			1.88179	0			0.862488	0
	8.45194	0			0.423582	0			1.89134	0			0.866866	0
	8.45194	0.0403443			0.423582	0.357782			1.89134	0.200321			0.866866	0.174825
	8.49463	0.0403443			0.425721	0.357782			1.9009	0.200321			0.871244	0.174825
	8.49463	0			0.425721	0			1.9009	0			0.871244	0
	8.53731	0			0.427861	0			1.91045	0			0.875622	0
	8.53731	0.0403443			0.427861	0.357782			1.91045	0.200321			0.875622	0.174825
	8.58	0.0403443			0.43	0.357782			1.92	0.200321			0.88	0.174825
	8.58	0			0.43	0			1.92	0			0.88	0
	8.62269	0			0.432139	0			1.92955	0			0.884378	0
	8.62269	0.0403443			0.432139	0.357782			1.92955	0.200321			0.884378	0.174825
	8.66537	0.0403443			0.434279	0.357782			1.9391	0.200321			0.888756	0.174825
	8.66537	0			0.434279	0			1.9391	0			0.888756	0
	8.70806	0			0.436418	0			1.94866	0			0.893134	0
	8.70806	0.0403443			0.436418	0.357782			1.94866	0.200321			0.893134	0.174825
	8.75075	0.0403443			0.438557	0.357782			1.95821	0.200321			0.897512	0.174825
	8.75075	0			0.438557	0			1.95821	0			0.897512	0
	8.79343	0			0.440697	0			1.96776	0			0.901891	0
	8.79343	0.0403443			0.440697	0.357782			1.96776	0.200321			0.901891	0.174825
	8.83612	0.0403443			0.442836	0.357782			1.97731	0.200321			0.906269	0.174825
	8.83612	0			0.442836	0			1.97731	0			0.906269	0
	8.87881	0			0.444975	0			1.98687	0			0.910647	0
	8.87881	0.0403443			0.444975	0.357782			1.98687	0.200321			0.910647	0.174825
	8.92149	0.0403443			0.447114	0.357782			1.99642	0.200321			0.915025	0.174825
	8.92149	0			0.447114	0			1.99642	0			0.915025	0
	8.96418	0			0.449254	0			2.00597	0			0.919403	0
	8.96418	0.0403443			0.449254	0.357782			2.00597	0.200321			0.919403	0.174825
	9.00687	0.0403443			0.451393	0.357782			2.01552	0.200321			0.923781	0.174825
	9.00687	0			0.451393	0			2.01552	0			0.923781	0
	9.04955	0			0.453532	0			2.02507	0			0.928159	0
	9.04955	0.0403443			0.453532	0.357782			2.02507	0.200321			0.928159	0.174825
	9.09224	0.0403443			0.455672	0.357782			2.03463	0.200321			0.932537	0.174825
	9.09224	0			0.455672	0			2.03463	0			0.932537	0
	9.13493	0			0.457811	0			2.04418	0			0.936915	0
	9.13493	0.0403443			0.457811	0.357782			2.04418	0.200321			0.936915	0.174825
	9.17761	0.0403443			0.45995	0.357782			2.05373	0.200321			0.941294	0.174825
	9.17761	0			0.45995	0			2.05373	0			0.941294	0
	9.2203	0			0.46209	0			2.06328	0			0.945672	0
	9.2203	0.0403443			0.46209	0.357782			2.06328	0.200321			0.945672	0.174825
	9.26299	0.0403443			0.464229	0.357782			2.07284	0.200321			0.95005	0.174825
	9.26299	0			0.464229	0			2.07284	0			0.95005	0
	9.30567	0			0.466368	0			2.08239	0			0.954428	0
	9.30567	0.0403443			0.466368	0.357782			2.08239	0.200321			0.954428	0.174825
	9.34836	0.0403443			0.468507	0.357782			2.09194	0.200321			0.958806	0.174825
	9.34836	0			0.468507	0			2.09194	0			0.958806	0
	9.39104	0			0.470647	0			2.10149	0			0.963184	0
	9.39104	0.0403443			0.470647	0.357782			2.10149	0.200321			0.963184	0.174825
	9.43373	0.0403443			0.472786	0.357782			2.11104	0.200321			0.967562	0.174825
	9.43373	0			0.472786	0			2.11104	0			0.967562	0
	9.47642	0			0.474925	0			2.1206	0			0.97194	0
	9.47642	0.0403443			0.474925	0.357782			2.1206	0.200321			0.97194	0.174825
	9.5191	0.0403443			0.477065	0.357782			2.13015	0.200321			0.976318	0.174825
	9.5191	0			0.477065	0			2.13015	0			0.976318	0
	9.56179	0			0.479204	0			2.1397	0			0.980697	0
	9.56179	0.0403443			0.479204	0.357782			2.1397	0.200321			0.980697	0.174825
	9.60448	0.0403443			0.481343	0.357782			2.14925	0.200321			0.985075	0.174825
	9.60448	0			0.481343	0			2.14925	0			0.985075	0
	9.64716	0			0.483483	0			2.15881	0			0.989453	0
	9.64716	0.0403443			0.483483	0.357782			2.15881	0.200321			0.989453	0.174825
	9.68985	0.0403443			0.485622	0.357782			2.16836	0.200321			0.993831	0.174825
	9.68985	0			0.485622	0			2.16836	0			0.993831	0
	9.73254	0			0.487761	0			2.17791	0			0.998209	0
	9.73254	0.0403443			0.487761	0.357782			2.17791	0.200321			0.998209	0.174825
	9.77522	0.0403443			0.4899	0.357782			2.18746	0.200321			1.00259	0.174825
	9.77522	0			0.4899	0			2.18746	0			1.00259	0
	9.81791	0			0.49204	0			2.19701	0			1.00697	0
	9.81791	0.0403443			0.49204	0.357782			2.19701	0.200321			1.00697	0.174825
	9.8606	0.0403443			0.494179	0.357782			2.20657	0.200321			1.01134	0.174825
	9.8606	0			0.494179	0			2.20657	0			1.01134	0
	9.90328	0			0.496318	0			2.21612	0			1.01572	0
	9.90328	0.0403443			0.496318	0.357782			2.21612	0.200321			1.01572	0.174825
	9.94597	0.0403443			0.498458	0.357782			2.22567	0.200321			1.0201	0.174825
	9.94597	0			0.498458	0			2.22567	0			1.0201	0
	9.98866	0			0.500597	0			2.23522	0			1.02448	0
	9.98866	0.0403443			0.500597	0.357782			2.23522	0.200321			1.02448	0.174825
	10.0313	0.0403443			0.502736	0.357782			2.24478	0.200321			1.02886	0.174825
	10.0313	0			0.502736	0			2.24478	0			1.02886	0
	10.074	0			0.504876	0			2.25433	0			1.03323	0
	10.074	0.0403443			0.504876	0.357782			2.25433	0.200321			1.03323	0.174825
	10.1167	0.0403443			0.507015	0.357782			2.26388	0.200321			1.03761	0.174825
	10.1167	0			0.507015	0			2.26388	0			1.03761	0
	10.1594	0			0.509154	0			2.27343	0			1.04199	0
	10.1594	0.0403443			0.509154	0.357782			2.27343	0.200321			1.04199	0.174825
	10.2021	0.0403443			0.511294	0.357782			2.28299	0.200321			1.04637	0.174825
	10.2021	0			0.511294	0			2.28299	0			1.04637	0
	10.2448	0			0.513433	0			2.29254	0			1.05075	0
	10.2448	0.0403443			0.513433	0.357782			2.29254	0.200321			1.05075	0.174825
	10.2875	0.0403443			0.515572	0.357782			2.30209	0.200321			1.05512	0.174825
	10.2875	0			0.515572	0			2.30209	0			1.05512	0
	10.3301	0			0.517711	0			2.31164	0			1.0595	0
	10.3301	0.0403443			0.517711	0.357782			2.31164	0.200321			1.0595	0.174825
	10.3728	0.0403443			0.519851	0.357782			2.32119	0.200321			1.06388	0.174825
	10.3728	0			0.519851	0			2.32119	0			1.06388	0
	10.4155	0			0.52199	0			2.33075	0			1.06826	0
	10.4155	0.0403443			0.52199	0.357782			2.33075	0.200321			1.06826	0.174825
	10.4582	0.0403443			0.524129	0.357782			2.3403	0.200321			1.07264	0.174825
	10.4582	0			0.524129	0			2.3403	0			1.07264	0
	10.5009	0			0.526269	0			2.34985	0			1.07701	0
	10.5009	0.0403443			0.526269	0.357782			2.34985	0.200321			1.07701	0.174825
	10.5436	0.0403443			0.528408	0.357782			2.3594	0.200321			1.08139	0.174825
	10.5436	0			0.528408	0			2.3594	0			1.08139	0
	10.5863	0			0.530547	0			2.36896	0			1.08577	0
	10.5863	0.0403443			0.530547	0.357782			2.36896	0.200321			1.08577	0.174825
	10.629	0.0403443			0.532687	0.357782			2.37851	0.200321			1.09015	0.174825
	10.629	0			0.532687	0			2.37851	0			1.09015	0
	10.6716	0			0.534826	0			2.38806	0			1.09453	0
	10.6716	0.0403443			0.534826	0.357782			2.38806	0.200321			1.09453	0.174825
	10.7143	0.0403443			0.536965	0.357782			2.39761	0.200321			1.09891	0.174825
	10.7143	0			0.536965	0			2.39761	0			1.09891	0
	10.757	0			0.539104	0			2.40716	0			1.10328	0
	10.757	0.0403443			0.539104	0.357782			2.40716	0.200321			1.10328	0.174825
	10.7997	0.0403443			0.541244	0.357782			2.41672	0.200321			1.10766	0.174825
	10.7997	0			0.541244	0			2.41672	0			1.10766	0
	10.8424	0			0.543383	0			2.42627	0			1.11204	0
	10.8424	0.0403443			0.543383	0.357782			2.42627	0.200321			1.11204	0.174825
	10.8851	0.0403443			0.545522	0.357782			2.43582	0.200321			1.11642	0.174825
	10.8851	0			0.545522	0			2.43582	0			1.11642	0
	10.9278	0			0.547662	0			2.44537	0			1.1208	0
	10.9278	0.0403443			0.547662	0.357782			2.44537	0.200321			1.1208	0.174825
	10.9704	0.0403443			0.549801	0.357782			2.45493	0.200321			1.12517	0.174825
	10.9704	0			0.549801	0			2.45493	0			1.12517	0
	11.0131	0			0.55194	0			2.46448	0			1.12955	0
	11.0131	0.0403443			0.55194	0.357782			2.46448	0.200321			1.12955	0.174825
	11.0558	0.0403443			0.55408	0.357782			2.47403	0.200321			1.13393	0.174825
	11.0558	0			0.55408	0			2.47403	0			1.13393	0
	11.0985	0			0.556219	0			2.48358	0			1.13831	0
	11.0985	0.0403443			0.556219	0.357782			2.48358	0.200321			1.13831	0.174825
	11.1412	0.0403443			0.558358	0.357782			2.49313	0.200321			1.14269	0.174825
	11.1412	0			0.558358	0			2.49313	0			1.14269	0
	11.1839	0			0.560498	0			2.50269	0			1.14706	0
	11.1839	0.0403443			0.560498	0.357782			2.50269	0.200321			1.14706	0.174825
	11.2266	0.0403443			0.562637	0.357782			2.51224	0.200321			1.15144	0.174825
	11.2266	0			0.562637	0			2.51224	0			1.15144	0
	11.2693	0			0.564776	0			2.52179	0			1.15582	0
	11.2693	0.0403443			0.564776	0.357782			2.52179	0.200321			1.15582	0.174825
	11.3119	0.0403443			0.566915	0.357782			2.53134	0.200321			1.1602	0.174825
	11.3119	0			0.566915	0			2.53134	0			1.1602	0
	11.3546	0			0.569055	0			2.5409	0			1.16458	0
	11.3546	0.0403443			0.569055	0.357782			2.5409	0.200321			1.16458	0.174825
	11.3973	0.0403443			0.571194	0.357782			2.55045	0.200321			1.16896	0.174825
	11.3973	0			0.571194	0			2.55045	0			1.16896	0
	11.44	0			0.573333	0			2.56	0			1.17333	0
	11.44	0.0403443			0.573333	0.357782			2.56	0.200321			1.17333	0.174825
	11.4827	0.0403443			0.575473	0.357782			2.56955	0.200321			1.17771	0.174825
	11.4827	0			0.575473	0			2.56955	0			1.17771	0
	11.5254	0			0.577612	0			2.5791	0			1.18209	0
	11.5254	0.0403443			0.577612	0.357782			2.5791	0.200321			1.18209	0.174825
	11.5681	0.0403443			0.579751	0.357782			2.58866	0.200321			1.18647	0.174825
	11.5681	0			0.579751	0			2.58866	0			1.18647	0
	11.6107	0			0.581891	0			2.59821	0			1.19085	0
	11.6107	0.0403443			0.581891	0.357782			2.59821	0.200321			1.19085	0.174825
	11.6534	0.0403443			0.58403	0.357782			2.60776	0.200321			1.19522	0.174825
	11.6534	0			0.58403	0			2.60776	0			1.19522	0
	11.6961	0			0.586169	0			2.61731	0			1.1996	0
	11.6961	0.0403443			0.586169	0.357782			2.61731	0.200321			1.1996	0.174825
	11.7388	0.0403443			0.588308	0.357782			2.62687	0.200321			1.20398	0.174825
	11.7388	0			0.588308	0			2.62687	0			1.20398	0
	11.7815	0			0.590448	0			2.63642	0			1.20836	0
	11.7815	0.0403443			0.590448	0.357782			2.63642	0.200321			1.20836	0.174825
	11.8242	0.0403443			0.592587	0.357782			2.64597	0.200321			1.21274	0.174825
	11.8242	0			0.592587	0			2.64597	0			1.21274	0
	11.8669	0			0.594726	0			2.65552	0			1.21711	0
	11.8669	0.0403443			0.594726	0.357782			2.65552	0.200321			1.21711	0.174825
	11.9096	0.0403443			0.596866	0.357782			2.66507	0.200321			1.22149	0.174825
	11.9096	0			0.596866	0			2.66507	0			1.22149	0
	11.9522	0			0.599005	0			2.67463	0			1.22587	0
	11.9522	0.0403443			0.599005	0.357782			2.67463	0.200321			1.22587	0.174825
	11.9949	0.0403443			0.601144	0.357782			2.68418	0.200321			1.23025	0.174825
	11.9949	0			0.601144	0			2.68418	0			1.23025	0
	12.0376	0			0.603284	0			2.69373	0			1.23463	0
	12.0376	0.0403443			0.603284	0.357782			2.69373	0.200321			1.23463	0.174825
	12.0803	0.0403443			0.605423	0.357782			2.70328	0.200321			1.239	0.174825
	12.0803	0			0.605423	0			2.70328	0			1.239	0
	12.123	0			0.607562	0			2.71284	0			1.24338	0
	12.123	0.0403443			0.607562	0.357782			2.71284	0.200321			1.24338	0.174825
	12.1657	0.0403443			0.609701	0.357782			2.72239	0.200321			1.24776	0.174825
	12.1657	0			0.609701	0			2.72239	0			1.24776	0
	12.2084	0			0.611841	0			2.73194	0			1.25214	0
	12.2084	0.0403443			0.611841	0.357782			2.73194	0.200321			1.25214	0.174825
	12.251	0.0403443			0.61398	0.357782			2.74149	0.200321			1.25652	0.174825
	12.251	0			0.61398	0			2.74149	0			1.25652	0
	12.2937	0			0.616119	0			2.75104	0			1.2609	0
	12.2937	0.0403443			0.616119	0.357782			2.75104	0.200321			1.2609	0.174825
	12.3364	0.0403443			0.618259	0.357782			2.7606	0.200321			1.26527	0.174825
	12.3364	0			0.618259	0			2.7606	0			1.26527	0
	12.3791	0			0.620398	0			2.77015	0			1.26965	0
	12.3791	0.0403443			0.620398	0.357782			2.77015	0.200321			1.26965	0.174825
	12.4218	0.0403443			0.622537	0.357782			2.7797	0.200321			1.27403	0.174825
	12.4218	0			0.622537	0			2.7797	0			1.27403	0
	12.4645	0			0.624677	0			2.78925	0			1.27841	0
	12.4645	0.0403443			0.624677	0.357782			2.78925	0.200321			1.27841	0.174825
	12.5072	0.0403443			0.626816	0.357782			2.79881	0.200321			1.28279	0.174825
	12.5072	0			0.626816	0			2.79881	0			1.28279	0
	12.5499	0			0.628955	0			2.80836	0			1.28716	0
	12.5499	0.0403443			0.628955	0.357782			2.80836	0.200321			1.28716	0.174825
	12.5925	0.0403443			0.631095	0.357782			2.81791	0.200321			1.29154	0.174825
	12.5925	0			0.631095	0			2.81791	0			1.29154	0
	12.6352	0			0.633234	0			2.82746	0			1.29592	0
	12.6352	0.0403443			0.633234	0.357782			2.82746	0.200321			1.29592	0.174825
	12.6779	0.0403443			0.635373	0.357782			2.83701	0.200321			1.3003	0.174825
	12.6779	0			0.635373	0			2.83701	0			1.3003	0
	12.7206	0			0.637512	0			2.84657	0			1.30468	0
	12.7206	0.0403443			0.637512	0.357782			2.84657	0.200321			1.30468	0.174825
	12.7633	0.0403443			0.639652	0.357782			2.85612	0.200321			1.30905	0.174825
	12.7633	0			0.639652	0			2.85612	0			1.30905	0
	12.806	0			0.641791	0			2.86567	0			1.31343	0
	12.806	0.0403443			0.641791	0.357782			2.86567	0.200321			1.31343	0.174825
	12.8487	0.0403443			0.64393	0.357782			2.87522	0.200321			1.31781	0.174825
	12.8487	0			0.64393	0			2.87522	0			1.31781	0
	12.8913	0			0.64607	0			2.88478	0			1.32219	0
	12.8913	0.0403443			0.64607	0.357782			2.88478	0.200321			1.32219	0.174825
	12.934	0.0403443			0.648209	0.357782			2.89433	0.200321			1.32657	0.174825
	12.934	0			0.648209	0			2.89433	0			1.32657	0
	12.9767	0			0.650348	0			2.90388	0			1.33095	0
	12.9767	0.0403443			0.650348	0.357782			2.90388	0.200321			1.33095	0.174825
	13.0194	0.0403443			0.652488	0.357782			2.91343	0.200321			1.33532	0.174825
	13.0194	0			0.652488	0			2.91343	0			1.33532	0
	13.0621	0			0.654627	0			2.92299	0			1.3397	0
	13.0621	0.0403443			0.654627	0.357782			2.92299	0.200321			1.3397	0.174825
	13.1048	0.0403443			0.656766	0.357782			2.93254	0.200321			1.34408	0.174825
	13.1048	0			0.656766	0			2.93254	0			1.34408	0
	13.1475	0			0.658905	0			2.94209	0			1.34846	0
	13.1475	0.0403443			0.658905	0.357782			2.94209	0.200321			1.34846	0.174825
	13.1901	0.0403443			0.661045	0.357782			2.95164	0.200321			1.35284	0.174825
	13.1901	0			0.661045	0			2.95164	0			1.35284	0
	13.2328	0			0.663184	0			2.96119	0			1.35721	0
	13.2328	0.0403443			0.663184	0.357782			2.96119	0.200321			1.35721	0.174825
	13.2755	0.0403443			0.665323	0.357782			2.97075	0.200321			1.36159	0.174825
	13.2755	0			0.665323	0			2.97075	0			1.36159	0
	13.3182	0			0.667463	0			2.9803	0			1.36597	0
	13.3182	0.0403443			0.667463	0.357782			2.9803	0.200321			1.36597	0.174825
	13.3609	0.0403443			0.669602	0.357782			2.98985	0.200321			1.37035	0.174825
	13.3609	0			0.669602	0			2.98985	0			1.37035	0
	13.4036	0			0.671741	0			2.9994	0			1.37473	0
	13.4036	0.0403443			0.671741	0.357782			2.9994	0.200321			1.37473	0.174825
	13.4463	0.0403443			0.673881	0.357782			3.00896	0.200321			1.3791	0.174825
	13.4463	0			0.673881	0			3.00896	0			1.3791	0
	13.489	0			0.67602	0			3.01851	0			1.38348	0
	13.489	0.0403443			0.67602	0.357782			3.01851	0.200321			1.38348	0.174825
	13.5316	0.0403443			0.678159	0.357782			3.02806	0.200321			1.38786	0.174825
	13.5316	0			0.678159	0			3.02806	0			1.38786	0
	13.5743	0			0.680299	0			3.03761	0			1.39224	0
	13.5743	0.0403443			0.680299	0.357782			3.03761	0.200321			1.39224	0.174825
	13.617	0.0403443			0.682438	0.357782			3.04716	0.200321			1.39662	0.174825
	13.617	0			0.682438	0			3.04716	0			1.39662	0
	13.6597	0			0.684577	0			3.05672	0			1.401	0
	13.6597	0.0403443			0.684577	0.357782			3.05672	0.200321			1.401	0.174825
	13.7024	0.0403443			0.686716	0.357782			3.06627	0.200321			1.40537	0.174825
	13.7024	0			0.686716	0			3.06627	0			1.40537	0
	13.7451	0			0.688856	0			3.07582	0			1.40975	0
	13.7451	0.0403443			0.688856	0.357782			3.07582	0.200321			1.40975	0.174825
	13.7878	0.0403443			0.690995	0.357782			3.08537	0.200321			1.41413	0.174825
	13.7878	0			0.690995	0			3.08537	0			1.41413	0
	13.8304	0			0.693134	0			3.09493	0			1.41851	0
	13.8304	0.0403443			0.693134	0.357782			3.09493	0.200321			1.41851	0.174825
	13.8731	0.0403443			0.695274	0.357782			3.10448	0.200321			1.42289	0.174825
	13.8731	0			0.695274	0			3.10448	0			1.42289	0
	13.9158	0			0.697413	0			3.11403	0			1.42726	0
	13.9158	0.0403443			0.697413	0.357782			3.11403	0.200321			1.42726	0.174825
	13.9585	0.0403443			0.699552	0.357782			3.12358	0.200321			1.43164	0.174825
	13.9585	0			0.699552	0			3.12358	0			1.43164	0
	14.0012	0			0.701692	0			3.13313	0			1.43602	0
	14.0012	0.0403443			0.701692	0.357782			3.13313	0.200321			1.43602	0.174825
	14.0439	0.0403443			0.703831	0.357782			3.14269	0.200321			1.4404	0.174825
	14.0439	0			0.703831	0			3.14269	0			1.4404	0
	14.0866	0			0.70597	0			3.15224	0			1.44478	0
	14.0866	0.0403443			0.70597	0.357782			3.15224	0.200321			1.44478	0.174825
	14.1293	0.0403443			0.708109	0.357782			3.16179	0.200321			1.44915	0.174825
	14.1293	0			0.708109	0			3.16179	0			1.44915	0
	14.1719	0			0.710249	0			3.17134	0			1.45353	0
	14.1719	0.0403443			0.710249	0.357782			3.17134	0.200321			1.45353	0.174825
	14.2146	0.0403443			0.712388	0.357782			3.1809	0.200321			1.45791	0.174825
	14.2146	0			0.712388	0			3.1809	0			1.45791	0
	14.2573	0			0.714527	0			3.19045	0			1.46229	0
	14.2573	0.0403443			0.714527	0.357782			3.19045	0.200321			1.46229	0.174825
	14.3	0.0403443			0.716667	0.357782			3.2	0.200321			1.46667	0.174825
	14.3	0			0.716667	0			3.2	0			1.46667	0
	14.3427	0			0.718806	0			3.20955	0			1.47104	0
	14.3427	0.0403443			0.718806	0.357782			3.20955	0.200321			1.47104	0.174825
	14.3854	0.0403443			0.720945	0.357782			3.2191	0.200321			1.47542	0.174825
	14.3854	0			0.720945	0			3.2191	0			1.47542	0
	14.4281	0			0.723085	0			3.22866	0			1.4798	0
	14.4281	0.0403443			0.723085	0.357782			3.22866	0.200321			1.4798	0.174825
	14.4707	0.0403443			0.725224	0.357782			3.23821	0.200321			1.48418	0.174825
	14.4707	0			0.725224	0			3.23821	0			1.48418	0
	14.5134	0			0.727363	0			3.24776	0			1.48856	0
	14.5134	0.0403443			0.727363	0.357782			3.24776	0.200321			1.48856	0.174825
	14.5561	0.0403443			0.729502	0.357782			3.25731	0.200321			1.49294	0.174825
	14.5561	0			0.729502	0			3.25731	0			1.49294	0
	14.5988	0			0.731642	0			3.26687	0			1.49731	0
	14.5988	0.0403443			0.731642	0.357782			3.26687	0.200321			1.49731	0.174825
	14.6415	0.0403443			0.733781	0.357782			3.27642	0.200321			1.50169	0.174825
	14.6415	0			0.733781	0			3.27642	0			1.50169	0
	14.6842	0			0.73592	0			3.28597	0			1.50607	0
	14.6842	0.0403443			0.73592	0.357782			3.28597	0.200321			1.50607	0.174825
	14.7269	0.0403443			0.73806	0.357782			3.29552	0.200321			1.51045	0.174825
	14.7269	0			0.73806	0			3.29552	0			1.51045	0
	14.7696	0			0.740199	0			3.30507	0			1.51483	0
	14.7696	0.0403443			0.740199	0.357782			3.30507	0.200321			1.51483	0.174825
	14.8122	0.0403443			0.742338	0.357782			3.31463	0.200321			1.5192	0.174825
	14.8122	0			0.742338	0			3.31463	0			1.5192	0
	14.8549	0			0.744478	0			3.32418	0			1.52358	0
	14.8549	0.0403443			0.744478	0.357782			3.32418	0.200321			1.52358	0.174825
	14.8976	0.0403443			0.746617	0.357782			3.33373	0.200321			1.52796	0.174825
	14.8976	0			0.746617	0			3.33373	0			1.52796	0
	14.9403	0			0.748756	0			3.34328	0			1.53234	0
	14.9403	0.0403443			0.748756	0.357782			3.34328	0.200321			1.53234	0.174825
	14.983	0.0403443			0.750896	0.357782			3.35284	0.200321			1.53672	0.174825
	14.983	0			0.750896	0			3.35284	0			1.53672	0
	15.0257	0			0.753035	0			3.36239	0			1.54109	0
	15.0257	0.0403443			0.753035	0.357782			3.36239	0.200321			1.54109	0.174825
	15.0684	0.0403443			0.755174	0.357782			3.37194	0.200321			1.54547	0.174825
	15.0684	0			0.755174	0			3.37194	0			1.54547	0
	15.111	0			0.757313	0			3.38149	0			1.54985	0
	15.111	0.0403443			0.757313	0.357782			3.38149	0.200321			1.54985	0.174825
	15.1537	0.0403443			0.759453	0.357782			3.39104	0.200321			1.55423	0.174825
	15.1537	0			0.759453	0			3.39104	0			1.55423	0
	15.1964	0			0.761592	0			3.4006	0			1.55861	0
	15.1964	0.0403443			0.761592	0.357782			3.4006	0.200321			1.55861	0.174825
	15.2391	0.0403443			0.763731	0.357782			3.41015	0.200321			1.56299	0.174825
	15.2391	0			0.763731	0			3.41015	0			1.56299	0
	15.2818	0			0.765871	0			3.4197	0			1.56736	0
	15.2818	0.0403443			0.765871	0.357782			3.4197	0.200321			1.56736	0.174825
	15.3245	0.0403443			0.76801	0.357782			3.42925	0.200321			1.57174	0.174825
	15.3245	0			0.76801	0			3.42925	0			1.57174	0
	15.3672	0			0.770149	0			3.43881	0			1.57612	0
	15.3672	0.0403443			0.770149	0.357782			3.43881	0.200321			1.57612	0.174825
	15.4099	0.0403443			0.772289	0.357782			3.44836	0.200321			1.5805	0.174825
	15.4099	0			0.772289	0			3.44836	0			1.5805	0
	15.4525	0			0.774428	0			3.45791	0			1.58488	0
	15.4525	0.0403443			0.774428	0.357782			3.45791	0.200321			1.58488	0.174825
	15.4952	0.0403443			0.776567	0.357782			3.46746	0.200321			1.58925	0.174825
	15.4952	0			0.776567	0			3.46746	0			1.58925	0
	15.5379	0			0.778706	0			3.47701	0			1.59363	0
	15.5379	0.0403443			0.778706	0.357782			3.47701	0.200321			1.59363	0.174825
	15.5806	0.0403443			0.780846	0.357782			3.48657	0.200321			1.59801	0.174825
	15.5806	0			0.780846	0			3.48657	0			1.59801	0
	15.6233	0			0.782985	0			3.49612	0			1.60239	0
	15.6233	0.0403443			0.782985	0.357782			3.49612	0.200321			1.60239	0.174825
	15.666	0.0403443			0.785124	0.357782			3.50567	0.200321			1.60677	0.174825
	15.666	0			0.785124	0			3.50567	0			1.60677	0
	15.7087	0			0.787264	0			3.51522	0			1.61114	0
	15.7087	0.0403443			0.787264	0.357782			3.51522	0.200321			1.61114	0.174825
	15.7513	0.0403443			0.789403	0.357782			3.52478	0.200321			1.61552	0.174825
	15.7513	0			0.789403	0			3.52478	0			1.61552	0
	15.794	0			0.791542	0			3.53433	0			1.6199	0
	15.794	0.0403443			0.791542	0.357782			3.53433	0.200321			1.6199	0.174825
	15.8367	0.0403443			0.793682	0.357782			3.54388	0.200321			1.62428	0.174825
	15.8367	0			0.793682	0			3.54388	0			1.62428	0
	15.8794	0			0.795821	0			3.55343	0			1.62866	0
	15.8794	0.0403443			0.795821	0.357782			3.55343	0.200321			1.62866	0.174825
	15.9221	0.0403443			0.79796	0.357782			3.56299	0.200321			1.63303	0.174825
	15.9221	0			0.79796	0			3.56299	0			1.63303	0
	15.9648	0			0.8001	0			3.57254	0			1.63741	0
	15.9648	0.0403443			0.8001	0.357782			3.57254	0.200321			1.63741	0.174825
	16.0075	0.0403443			0.802239	0.357782			3.58209	0.200321			1.64179	0.174825
	16.0075	0			0.802239	0			3.58209	0			1.64179	0
	16.0501	0			0.804378	0			3.59164	0			1.64617	0
	16.0501	0.0403443			0.804378	0.357782			3.59164	0.200321			1.64617	0.174825
	16.0928	0.0403443			0.806517	0.357782			3.60119	0.200321			1.65055	0.174825
	16.0928	0			0.806517	0			3.60119	0			1.65055	0
	16.1355	0			0.808657	0			3.61075	0			1.65493	0
	16.1355	0.0403443			0.808657	0.357782			3.61075	0.200321			1.65493	0.174825
	16.1782	0.0403443			0.810796	0.357782			3.6203	0.200321			1.6593	0.174825
	16.1782	0			0.810796	0			3.6203	0			1.6593	0
	16.2209	0			0.812935	0			3.62985	0			1.66368	0
	16.2209	0.0403443			0.812935	0.357782			3.62985	0.200321			1.66368	0.174825
	16.2636	0.0403443			0.815075	0.357782			3.6394	0.200321			1.66806	0.174825
	16.2636	0			0.815075	0			3.6394	0			1.66806	0
	16.3063	0			0.817214	0			3.64896	0			1.67244	0
	16.3063	0.0403443			0.817214	0.357782			3.64896	0.200321			1.67244	0.174825
	16.349	0.0403443			0.819353	0.357782			3.65851	0.200321			1.67682	0.174825
	16.349	0			0.819353	0			3.65851	0			1.67682	0
	16.3916	0			0.821493	0			3.66806	0			1.68119	0
	16.3916	0.0403443			0.821493	0.357782			3.66806	0.200321			1.68119	0.174825
	16.4343	0.0403443			0.823632	0.357782			3.67761	0.200321			1.68557	0.174825
	16.4343	0			0.823632	0			3.67761	0			1.68557	0
	16.477	0			0.825771	0			3.68716	0			1.68995	0
	16.477	0.0403443			0.825771	0.357782			3.68716	0.200321			1.68995	0.174825
	16.5197	0.0403443			0.82791	0.357782			3.69672	0.200321			1.69433	0.174825
	16.5197	0			0.82791	0			3.69672	0			1.69433	0
	16.5624	0			0.83005	0			3.70627	0			1.69871	0
	16.5624	0.0403443			0.83005	0.357782			3.70627	0.200321			1.69871	0.174825
	16.6051	0.0403443			0.832189	0.357782			3.71582	0.200321			1.70308	0.174825
	16.6051	0			0.832189	0			3.71582	0			1.70308	0
	16.6478	0			0.834328	0			3.72537	0			1.70746	0
	16.6478	0.0403443			0.834328	0.357782			3.72537	0.200321			1.70746	0.174825
	16.6904	0.0403443			0.836468	0.357782			3.73493	0.200321			1.71184	0.174825
	16.6904	0			0.836468	0			3.73493	0			1.71184	0
	16.7331	0			0.838607	0			3.74448	0			1.71622	0
	16.7331	0.0403443			0.838607	0.357782			3.74448	0.200321			1.71622	0.174825
	16.7758	0.0403443			0.840746	0.357782			3.75403	0.200321			1.7206	0.174825
	16.7758	0			0.840746	0			3.75403	0			1.7206	0
	16.8185	0			0.842886	0			3.76358	0			1.72498	0
	16.8185	0.0403443			0.842886	0.357782			3.76358	0.200321			1.72498	0.174825
	16.8612	0.0403443			0.845025	0.357782			3.77313	0.200321			1.72935	0.174825
	16.8612	0			0.845025	0			3.77313	0			1.72935	0
	16.9039	0			0.847164	0			3.78269	0			1.73373	0
	16.9039	0.0403443			0.847164	0.357782			3.78269	0.200321			1.73373	0.174825
	16.9466	0.0403443			0.849303	0.357782			3.79224	0.200321			1.73811	0.174825
	16.9466	0			0.849303	0			3.79224	0			1.73811	0
	16.9893	0			0.851443	0			3.80179	0			1.74249	0
	16.9893	0.0403443			0.851443	0.357782			3.80179	0.200321			1.74249	0.174825
	17.0319	0.0403443			0.853582	0.357782			3.81134	0.200321			1.74687	0.174825
	17.0319	0			0.853582	0			3.81134	0			1.74687	0
	17.0746	0			0.855721	0			3.8209	0			1.75124	0
	17.0746	0.0403443			0.855721	0.357782			3.8209	0.200321			1.75124	0.174825
	17.1173	0.0403443			0.857861	0.357782			3.83045	0.200321			1.75562	0.174825
	17.1173	0			0.857861	0			3.83045	0			1.75562	0
	17.16	0			0.86	0			3.84	0			1.76	0
	17.16	0			0.86	0.0894454			3.84	0			1.76	0.305944
	17.2027	0			0.862139	0.0894454			3.84955	0			1.76438	0.305944
	17.2027	0			0.862139	0			3.84955	0			1.76438	0
	17.2454	0			0.864279	0			3.8591	0			1.76876	0
	17.2454	0			0.864279	0.0894454			3.8591	0			1.76876	0.305944
	17.2881	0			0.866418	0.0894454			3.86866	0			1.77313	0.305944
	17.2881	0			0.866418	0			3.86866	0			1.77313	0
	17.3307	0			0.868557	0			3.87821	0			1.77751	0
	17.3307	0			0.868557	0.0894454			3.87821	0			1.77751	0.305944
	17.3734	0			0.870697	0.0894454			3.88776	0			1.78189	0.305944
	17.3734	0			0.870697	0			3.88776	0			1.78189	0
	17.4161	0			0.872836	0			3.89731	0			1.78627	0
	17.4161	0			0.872836	0.0894454			3.89731	0			1.78627	0.305944
	17.4588	0			0.874975	0.0894454			3.90687	0			1.79065	0.305944
	17.4588	0			0.874975	0			3.90687	0			1.79065	0
	17.5015	0			0.877114	0			3.91642	0			1.79502	0
	17.5015	0			0.877114	0.0894454			3.91642	0			1.79502	0.305944
	17.5442	0			0.879254	0.0894454			3.92597	0			1.7994	0.305944
	17.5442	0			0.879254	0			3.92597	0			1.7994	0
	17.5869	0			0.881393	0			3.93552	0			1.80378	0
	17.5869	0			0.881393	0.0894454			3.93552	0			1.80378	0.305944
	17.6296	0			0.883532	0.0894454			3.94507	0			1.80816	0.305944
	17.6296	0			0.883532	0			3.94507	0			1.80816	0
	17.6722	0			0.885672	0			3.95463	0			1.81254	0
	17.6722	0			0.885672	0.0894454			3.95463	0			1.81254	0.305944
	17.7149	0			0.887811	0.0894454			3.96418	0			1.81692	0.305944
	17.7149	0			0.887811	0			3.96418	0			1.81692	0
	17.7576	0			0.88995	0			3.97373	0			1.82129	0
	17.7576	0			0.88995	0.0894454			3.97373	0			1.82129	0.305944
	17.8003	0			0.89209	0.0894454			3.98328	0			1.82567	0.305944
	17.8003	0			0.89209	0			3.98328	0			1.82567	0
	17.843	0			0.894229	0			3.99284	0			1.83005	0
	17.843	0			0.894229	0.0894454			3.99284	0			1.83005	0.305944
	17.8857	0			0.896368	0.0894454			4.00239	0			1.83443	0.305944
	17.8857	0			0.896368	0			4.00239	0			1.83443	0
	17.9284	0			0.898507	0			4.01194	0			1.83881	0
	17.9284	0			0.898507	0.0894454			4.01194	0			1.83881	0.305944
	17.971	0			0.900647	0.0894454			4.02149	0			1.84318	0.305944
	17.971	0			0.900647	0			4.02149	0			1.84318	0
	18.0137	0			0.902786	0			4.03104	0			1.84756	0
	18.0137	0			0.902786	0.0894454			4.03104	0			1.84756	0.305944
	18.0564	0			0.904925	0.0894454			4.0406	0			1.85194	0.305944
	18.0564	0			0.904925	0			4.0406	0			1.85194	0
	18.0991	0			0.907065	0			4.05015	0			1.85632	0
	18.0991	0			0.907065	0.0894454			4.05015	0			1.85632	0.305944
	18.1418	0			0.909204	0.0894454			4.0597	0			1.8607	0.305944
	18.1418	0			0.909204	0			4.0597	0			1.8607	0
	18.1845	0			0.911343	0			4.06925	0			1.86507	0
	18.1845	0			0.911343	0.0894454			4.06925	0			1.86507	0.305944
	18.2272	0			0.913483	0.0894454			4.07881	0			1.86945	0.305944
	18.2272	0			0.913483	0			4.07881	0			1.86945	0
	18.2699	0			0.915622	0			4.08836	0			1.87383	0
	18.2699	0			0.915622	0.0894454			4.08836	0			1.87383	0.305944
	18.3125	0			0.917761	0.0894454			4.09791	0			1.87821	0.305944
	18.3125	0			0.917761	0			4.09791	0			1.87821	0
	18.3552	0			0.9199	0			4.10746	0			1.88259	0
	18.3552	0			0.9199	0.0894454			4.10746	0			1.88259	0.305944
	18.3979	0			0.92204	0.0894454			4.11701	0			1.88697	0.305944
	18.3979	0			0.92204	0			4.11701	0			1.88697	0
	18.4406	0			0.924179	0			4.12657	0			1.89134	0
	18.4406	0			0.924179	0.0894454			4.12657	0			1.89134	0.305944
	18.4833	0			0.926318	0.0894454			4.13612	0			1.89572	0.305944
	18.4833	0			0.926318	0			4.13612	0			1.89572	0
	18.526	0			0.928458	0			4.14567	0			1.9001	0
	18.526	0			0.928458	0.0894454			4.14567	0			1.9001	0.305944
	18.5687	0			0.930597	0.0894454			4.15522	0			1.90448	0.305944
	18.5687	0			0.930597	0			4.15522	0			1.90448	0
	18.6113	0			0.932736	0			4.16478	0			1.90886	0
	18.6113	0			0.932736	0.0894454			4.16478	0			1.90886	0.305944
	18.654	0			0.934876	0.0894454			4.17433	0			1.91323	0.305944
	18.654	0			0.934876	0			4.17433	0			1.91323	0
	18.6967	0			0.937015	0			4.18388	0			1.91761	0
	18.6967	0			0.937015	0.0894454			4.18388	0			1.91761	0.305944
	18.7394	0			0.939154	0.0894454			4.19343	0			1.92199	0.305944
	18.7394	0			0.939154	0			4.19343	0			1.92199	0
	18.7821	0			0.941294	0			4.20299	0			1.92637	0
	18.7821	0			0.941294	0.0894454			4.20299	0			1.92637	0.305944
	18.8248	0			0.943433	0.0894454			4.21254	0			1.93075	0.305944
	18.8248	0			0.943433	0			4.21254	0			1.93075	0
	18.8675	0			0.945572	0			4.22209	0			1.93512	0
	18.8675	0			0.945572	0.0894454			4.22209	0			1.93512	0.305944
	18.9101	0			0.947711	0.0894454			4.23164	0			1.9395	0.305944
	18.9101	0			0.947711	0			4.23164	0			1.9395	0
	18.9528	0			0.949851	0			4.24119	0			1.94388	0
	18.9528	0			0.949851	0.0894454			4.24119	0			1.94388	0.305944
	18.9955	0			0.95199	0.0894454			4.25075	0			1.94826	0.305944
	18.9955	0			0.95199	0			4.25075	0			1.94826	0
	19.0382	0			0.954129	0			4.2603	0			1.95264	0
	19.0382	0			0.954129	0.0894454			4.2603	0			1.95264	0.305944
	19.0809	0			0.956269	0.0894454			4.26985	0			1.95701	0.305944
	19.0809	0			0.956269	0			4.26985	0			1.95701	0
	19.1236	0			0.958408	0			4.2794	0			1.96139	0
	19.1236	0			0.958408	0.0894454			4.2794	0			1.96139	0.305944
	19.1663	0			0.960547	0.0894454			4.28896	0			1.96577	0.305944
	19.1663	0			0.960547	0			4.28896	0			1.96577	0
	19.209	0			0.962687	0			4.29851	0			1.97015	0
	19.209	0			0.962687	0.0894454			4.29851	0			1.97015	0.305944
	19.2516	0			0.964826	0.0894454			4.30806	0			1.97453	0.305944
	19.2516	0			0.964826	0			4.30806	0			1.97453	0
	19.2943	0			0.966965	0			4.31761	0			1.97891	0
	19.2943	0			0.966965	0.0894454			4.31761	0			1.97891	0.305944
	19.337	0			0.969104	0.0894454			4.32716	0			1.98328	0.305944
	19.337	0			0.969104	0			4.32716	0			1.98328	0
	19.3797	0			0.971244	0			4.33672	0			1.98766	0
	19.3797	0			0.971244	0.0894454			4.33672	0			1.98766	0.305944
	19.4224	0			0.973383	0.0894454			4.34627	0			1.99204	0.305944
	19.4224	0			0.973383	0			4.34627	0			1.99204	0
	19.4651	0			0.975522	0			4.35582	0			1.99642	0
	19.4651	0			0.975522	0.0894454			4.35582	0			1.99642	0.305944
	19.5078	0			0.977662	0.0894454			4.36537	0			2.0008	0.305944
	19.5078	0			0.977662	0			4.36537	0			2.0008	0
	19.5504	0			0.979801	0			4.37493	0			2.00517	0
	19.5504	0			0.979801	0.0894454			4.37493	0			2.00517	0.305944
	19.5931	0			0.98194	0.0894454			4.38448	0			2.00955	0.305944
	19.5931	0			0.98194	0			4.38448	0			2.00955	0
	19.6358	0			0.98408	0			4.39403	0			2.01393	0
	19.6358	0			0.98408	0.0894454			4.39403	0			2.01393	0.305944
	19.6785	0			0.986219	0.0894454			4.40358	0			2.01831	0.305944
	19.6785	0			0.986219	0			4.40358	0			2.01831	0
	19.7212	0			0.988358	0			4.41313	0			2.02269	0
	19.7212	0			0.988358	0.0894454			4.41313	0			2.02269	0.305944
	19.7639	0			0.990498	0.0894454			4.42269	0			2.02706	0.305944
	19.7639	0			0.990498	0			4.42269	0			2.02706	0
	19.8066	0			0.992637	0			4.43224	0			2.03144	0
	19.8066	0			0.992637	0.0894454			4.43224	0			2.03144	0.305944
	19.8493	0			0.994776	0.0894454			4.44179	0			2.03582	0.305944
	19.8493	0			0.994776	0			4.44179	0			2.03582	0
	19.8919	0			0.996915	0			4.45134	0			2.0402	0
	19.8919	0			0.996915	0.0894454			4.45134	0			2.0402	0.305944
	19.9346	0			0.999055	0.0894454			4.4609	0			2.04458	0.305944
	19.9346	0			0.999055	0			4.4609	0			2.04458	0
	19.9773	0			1.00119	0			4.47045	0			2.04896	0
	19.9773	0			1.00119	0.0894454			4.47045	0			2.04896	0.305944
	20.02	0			1.00333	0.0894454			4.48	0			2.05333	0.305944
	20.02	0			1.00333	0			4.48	0			2.05333	0
	20.0627	0			1.00547	0			4.48955	0			2.05771	0
	20.0627	0			1.00547	0.0894454			4.48955	0			2.05771	0.305944
	20.1054	0			1.00761	0.0894454			4.4991	0			2.06209	0.305944
	20.1054	0			1.00761	0			4.4991	0			2.06209	0
	20.1481	0			1.00975	0			4.50866	0			2.06647	0
	20.1481	0			1.00975	0.0894454			4.50866	0			2.06647	0.305944
	20.1907	0			1.01189	0.0894454			4.51821	0			2.07085	0.305944
	20.1907	0			1.01189	0			4.51821	0			2.07085	0
	20.2334	0			1.01403	0			4.52776	0			2.07522	0
	20.2334	0			1.01403	0.0894454			4.52776	0			2.07522	0.305944
	20.2761	0			1.01617	0.0894454			4.53731	0			2.0796	0.305944
	20.2761	0			1.01617	0			4.53731	0			2.0796	0
	20.3188	0			1.01831	0			4.54687	0			2.08398	0
	20.3188	0			1.01831	0.0894454			4.54687	0			2.08398	0.305944
	20.3615	0			1.02045	0.0894454			4.55642	0			2.08836	0.305944
	20.3615	0			1.02045	0			4.55642	0			2.08836	0
	20.4042	0			1.02259	0			4.56597	0			2.09274	0
	20.4042	0			1.02259	0.0894454			4.56597	0			2.09274	0.305944
	20.4469	0			1.02473	0.0894454			4.57552	0			2.09711	0.305944
	20.4469	0			1.02473	0			4.57552	0			2.09711	0
	20.4896	0			1.02687	0			4.58507	0			2.10149	0
	20.4896	0			1.02687	0.0894454			4.58507	0			2.10149	0.305944
	20.5322	0			1.029	0.0894454			4.59463	0			2.10587	0.305944
	20.5322	0			1.029	0			4.59463	0			2.10587	0
	20.5749	0			1.03114	0			4.60418	0			2.11025	0
	20.5749	0			1.03114	0.0894454			4.60418	0			2.11025	0.305944
	20.6176	0			1.03328	0.0894454			4.61373	0			2.11463	0.305944
	20.6176	0			1.03328	0			4.61373	0			2.11463	0
	20.6603	0			1.03542	0			4.62328	0			2.119	0
	20.6603	0			1.03542	0.0894454			4.62328	0			2.119	0.305944
	20.703	0			1.03756	0.0894454			4.63284	0			2.12338	0.305944
	20.703	0			1.03756	0			4.63284	0			2.12338	0
	20.7457	0			1.0397	0			4.64239	0			2.12776	0
	20.7457	0			1.0397	0.0894454			4.64239	0			2.12776	0.305944
	20.7884	0			1.04184	0.0894454			4.65194	0			2.13214	0.305944
	20.7884	0			1.04184	0			4.65194	0			2.13214	0
	20.831	0			1.04398	0			4.66149	0			2.13652	0
	20.831	0			1.04398	0.0894454			4.66149	0			2.13652	0.305944
	20.8737	0			1.04612	0.0894454			4.67104	0			2.1409	0.305944
	20.8737	0			1.04612	0			4.67104	0			2.1409	0
	20.9164	0			1.04826	0			4.6806	0			2.14527	0
	20.9164	0			1.04826	0.0894454			4.6806	0			2.14527	0.305944
	20.9591	0			1.0504	0.0894454			4.69015	0			2.14965	0.305944
	20.9591	0			1.0504	0			4.69015	0			2.14965	0
	21.0018	0			1.05254	0			4.6997	0			2.15403	0
	21.0018	0			1.05254	0.0894454			4.6997	0			2.15403	0.305944
	21.0445	0			1.05468	0.0894454			4.70925	0			2.15841	0.305944
	21.0445	0			1.05468	0			4.70925	0			2.15841	0
	21.0872	0			1.05682	0			4.71881	0			2.16279	0
	21.0872	0			1.05682	0.0894454			4.71881	0			2.16279	0.305944
	21.1299	0			1.05896	0.0894454			4.72836	0			2.16716	0.305944
	21.1299	0			1.05896	0			4.72836	0			2.16716	0
	21.1725	0			1.06109	0			4.73791	0			2.17154	0
	21.1725	0			1.06109	0.0894454			4.73791	0			2.17154	0.305944
	21.2152	0			1.06323	0.0894454			4.74746	0			2.17592	0.305944
	21.2152	0			1.06323	0			4.74746	0			2.17592	0
	21.2579	0			1.06537	0			4.75701	0			2.1803	0
	21.2579	0			1.06537	0.0894454			4.75701	0			2.1803	0.305944
	21.3006	0			1.06751	0.0894454			4.76657	0			2.18468	0.305944
	21.3006	0			1.06751	0			4.76657	0			2.18468	0
	21.3433	0			1.06965	0			4.77612	0			2.18905	0
	21.3433	0			1.06965	0.0894454			4.77612	0			2.18905	0.305944
	21.386	0			1.07179	0.0894454			4.78567	0			2.19343	0.305944
	21.386	0			1.07179	0			4.78567	0			2.19343	0
	21.4287	0			1.07393	0			4.79522	0			2.19781	0
	21.4287	0			1.07393	0.0894454			4.79522	0			2.19781	0.305944
	21.4713	0			1.07607	0.0894454			4.80478	0			2.20219	0.305944
	21.4713	0			1.07607	0			4.80478	0			2.20219	0
	21.514	0			1.07821	0			4.81433	0			2.20657	0
	21.514	0			1.07821	0.0894454			4.81433	0			2.20657	0.305944
	21.5567	0			1.08035	0.0894454			4.82388	0			2.21095	0.305944
	21.5567	0			1.08035	0			4.82388	0			2.21095	0
	21.5994	0			1.08249	0			4.83343	0			2.21532	0
	21.5994	0			1.08249	0.0894454			4.83343	0			2.21532	0.305944
	21.6421	0			1.08463	0.0894454			4.84299	0			2.2197	0.305944
	21.6421	0			1.08463	0			4.84299	0			2.2197	0
	21.6848	0			1.08677	0			4.85254	0			2.22408	0
	21.6848	0			1.08677	0.0894454			4.85254	0			2.22408	0.305944
	21.7275	0			1.08891	0.0894454			4.86209	0			2.22846	0.305944
	21.7275	0			1.08891	0			4.86209	0			2.22846	0
	21.7701	0			1.09104	0			4.87164	0			2.23284	0
	21.7701	0			1.09104	0.0894454			4.87164	0			2.23284	0.305944
	21.8128	0			1.09318	0.0894454			4.88119	0			2.23721	0.305944
	21.8128	0			1.09318	0			4.88119	0			2.23721	0
	21.8555	0			1.09532	0			4.89075	0			2.24159	0
	21.8555	0			1.09532	0.0894454			4.89075	0			2.24159	0.305944
	21.8982	0			1.09746	0.0894454			4.9003	0			2.24597	0.305944
	21.8982	0			1.09746	0			4.9003	0			2.24597	0
	21.9409	0			1.0996	0			4.90985	0			2.25035	0
	21.9409	0			1.0996	0.0894454			4.90985	0			2.25035	0.305944
	21.9836	0			1.10174	0.0894454			4.9194	0			2.25473	0.305944
	21.9836	0			1.10174	0			4.9194	0			2.25473	0
	22.0263	0			1.10388	0			4.92896	0			2.2591	0
	22.0263	0			1.10388	0.0894454			4.92896	0			2.2591	0.305944
	22.069	0			1.10602	0.0894454			4.93851	0			2.26348	0.305944
	22.069	0			1.10602	0			4.93851	0			2.26348	0
	22.1116	0			1.10816	0			4.94806	0			2.26786	0
	22.1116	0			1.10816	0.0894454			4.94806	0			2.26786	0.305944
	22.1543	0			1.1103	0.0894454			4.95761	0			2.27224	0.305944
	22.1543	0			1.1103	0			4.95761	0			2.27224	0
	22.197	0			1.11244	0			4.96716	0			2.27662	0
	22.197	0			1.11244	0.0894454			4.96716	0			2.27662	0.305944
	22.2397	0			1.11458	0.0894454			4.97672	0			2.281	0.305944
	22.2397	0			1.11458	0			4.97672	0			2.281	0
	22.2824	0			1.11672	0			4.98627	0			2.28537	0
	22.2824	0			1.11672	0.0894454			4.98627	0			2.28537	0.305944
	22.3251	0			1.11886	0.0894454			4.99582	0			2.28975	0.305944
	22.3251	0			1.11886	0			4.99582	0			2.28975	0
	22.3678	0			1.121	0			5.00537	0			2.29413	0
	22.3678	0			1.121	0.0894454			5.00537	0			2.29413	0.305944
	22.4104	0			1.12313	0.0894454			5.01493	0			2.29851	0.305944
	22.4104	0			1.12313	0			5.01493	0			2.29851	0
	22.4531	0			1.12527	0			5.02448	0			2.30289	0
	22.4531	0			1.12527	0.0894454			5.02448	0			2.30289	0.305944
	22.4958	0			1.12741	0.0894454			5.03403	0			2.30726	0.305944
	22.4958	0			1.12741	0			5.03403	0			2.30726	0
	22.5385	0			1.12955	0			5.04358	0			2.31164	0
	22.5385	0			1.12955	0.0894454			5.04358	0			2.31164	0.305944
	22.5812	0			1.13169	0.0894454			5.05313	0			2.31602	0.305944
	22.5812	0			1.13169	0			5.05313	0			2.31602	0
	22.6239	0			1.13383	0			5.06269	0			2.3204	0
	22.6239	0			1.13383	0.0894454			5.06269	0			2.3204	0.305944
	22.6666	0			1.13597	0.0894454			5.07224	0			2.32478	0.305944
	22.6666	0			1.13597	0			5.07224	0			2.32478	0
	22.7093	0			1.13811	0			5.08179	0			2.32915	0
	22.7093	0			1.13811	0.0894454			5.08179	0			2.32915	0.305944
	22.7519	0			1.14025	0.0894454			5.09134	0			2.33353	0.305944
	22.7519	0			1.14025	0			5.09134	0			2.33353	0
	22.7946	0			1.14239	0			5.1009	0			2.33791	0
	22.7946	0			1.14239	0.0894454			5.1009	0			2.33791	0.305944
	22.8373	0			1.14453	0.0894454			5.11045	0			2.34229	0.305944
	22.8373	0			1.14453	0			5.11045	0			2.34229	0
	22.88	0			1.14667	0			5.12	0			2.34667	0
	22.88	0			1.14667	0.0894454			5.12	0			2.34667	0.305944
	22.9227	0			1.14881	0.0894454			5.12955	0			2.35104	0.305944
	22.9227	0			1.14881	0			5.12955	0			2.35104	0
	22.9654	0			1.15095	0			5.1391	0			2.35542	0
	22.9654	0			1.15095	0.0894454			5.1391	0			2.35542	0.305944
	23.0081	0			1.15308	0.0894454			5.14866	0			2.3598	0.305944
	23.0081	0			1.15308	0			5.14866	0			2.3598	0
	23.0507	0			1.15522	0			5.15821	0			2.36418	0
	23.0507	0			1.15522	0.0894454			5.15821	0			2.36418	0.305944
	23.0934	0			1.15736	0.0894454			5.16776	0			2.36856	0.305944
	23.0934	0			1.15736	0			5.16776	0			2.36856	0
	23.1361	0			1.1595	0			5.17731	0			2.37294	0
	23.1361	0			1.1595	0.0894454			5.17731	0			2.37294	0.305944
	23.1788	0			1.16164	0.0894454			5.18687	0			2.37731	0.305944
	23.1788	0			1.16164	0			5.18687	0			2.37731	0
	23.2215	0			1.16378	0			5.19642	0			2.38169	0
	23.2215	0			1.16378	0.0894454			5.19642	0			2.38169	0.305944
	23.2642	0			1.16592	0.0894454			5.20597	0			2.38607	0.305944
	23.2642	0			1.16592	0			5.20597	0			2.38607	0
	23.3069	0			1.16806	0			5.21552	0			2.39045	0
	23.3069	0			1.16806	0.0894454			5.21552	0			2.39045	0.305944
	23.3496	0			1.1702	0.0894454			5.22507	0			2.39483	0.305944
	23.3496	0			1.1702	0			5.22507	0			2.39483	0
	23.3922	0			1.17234	0			5.23463	0			2.3992	0
	23.3922	0			1.17234	0.0894454			5.23463	0			2.3992	0.305944
	23.4349	0			1.17448	0.0894454			5.24418	0			2.40358	0.305944
	23.4349	0			1.17448	0			5.24418	0			2.40358	0
	23.4776	0			1.17662	0			5.25373	0			2.40796	0
	23.4776	0			1.17662	0.0894454			5.25373	0			2.40796	0.305944
	23.5203	0			1.17876	0.0894454			5.26328	0			2.41234	0.305944
	23.5203	0			1.17876	0			5.26328	0			2.41234	0
	23.563	0			1.1809	0			5.27284	0			2.41672	0
	23.563	0			1.1809	0.0894454			5.27284	0			2.41672	0.305944
	23.6057	0			1.18303	0.0894454			5.28239	0			2.42109	0.305944
	23.6057	0			1.18303	0			5.28239	0			2.42109	0
	23.6484	0			1.18517	0			5.29194	0			2.42547	0
	23.6484	0			1.18517	0.0894454			5.29194	0			2.42547	0.305944
	23.691	0			1.18731	0.0894454			5.30149	0			2.42985	0.305944
	23.691	0			1.18731	0			5.30149	0			2.42985	0
	23.7337	0			1.18945	0			5.31104	0			2.43423	0
	23.7337	0			1.18945	0.0894454			5.31104	0			2.43423	0.305944
	23.7764	0			1.19159	0.0894454			5.3206	0			2.43861	0.305944
	23.7764	0			1.19159	0			5.3206	0			2.43861	0
	23.8191	0			1.19373	0			5.33015	0			2.44299	0
	23.8191	0			1.19373	0.0894454			5.33015	0			2.44299	0.305944
	23.8618	0			1.19587	0.0894454			5.3397	0			2.44736	0.305944
	23.8618	0			1.19587	0			5.3397	0			2.44736	0
	23.9045	0			1.19801	0			5.34925	0			2.45174	0
	23.9045	0			1.19801	0.0894454			5.34925	0			2.45174	0.305944
	23.9472	0			1.20015	0.0894454			5.35881	0			2.45612	0.305944
	23.9472	0			1.20015	0			5.35881	0			2.45612	0
	23.9899	0			1.20229	0			5.36836	0			2.4605	0
	23.9899	0			1.20229	0.0894454			5.36836	0			2.4605	0.305944
	24.0325	0			1.20443	0.0894454			5.37791	0			2.46488	0.305944
	24.0325	0			1.20443	0			5.37791	0			2.46488	0
	24.0752	0			1.20657	0			5.38746	0			2.46925	0
	24.0752	0			1.20657	0.0894454			5.38746	0			2.46925	0.305944
	24.1179	0			1.20871	0.0894454			5.39701	0			2.47363	0.305944
	24.1179	0			1.20871	0			5.39701	0			2.47363	0
	24.1606	0			1.21085	0			5.40657	0			2.47801	0
	24.1606	0			1.21085	0.0894454			5.40657	0			2.47801	0.305944
	24.2033	0			1.21299	0.0894454			5.41612	0			2.48239	0.305944
	24.2033	0			1.21299	0			5.41612	0			2.48239	0
	24.246	0			1.21512	0			5.42567	0			2.48677	0
	24.246	0			1.21512	0.0894454			5.42567	0			2.48677	0.305944
	24.2887	0			1.21726	0.0894454			5.43522	0			2.49114	0.305944
	24.2887	0			1.21726	0			5.43522	0			2.49114	0
	24.3313	0			1.2194	0			5.44478	0			2.49552	0
	24.3313	0			1.2194	0.0894454			5.44478	0			2.49552	0.305944
	24.374	0			1.22154	0.0894454			5.45433	0			2.4999	0.305944
	24.374	0			1.22154	0			5.45433	0			2.4999	0
	24.4167	0			1.22368	0			5.46388	0			2.50428	0
	24.4167	0			1.22368	0.0894454			5.46388	0			2.50428	0.305944
	24.4594	0			1.22582	0.0894454			5.47343	0			2.50866	0.305944
	24.4594	0			1.22582	0			5.47343	0			2.50866	0
	24.5021	0			1.22796	0			5.48299	0			2.51303	0
	24.5021	0			1.22796	0.0894454			5.48299	0			2.51303	0.305944
	24.5448	0			1.2301	0.0894454			5.49254	0			2.51741	0.305944
	24.5448	0			1.2301	0			5.49254	0			2.51741	0
	24.5875	0			1.23224	0			5.50209	0			2.52179	0
	24.5875	0			1.23224	0.0894454			5.50209	0			2.52179	0.305944
	24.6301	0			1.23438	0.0894454			5.51164	0			2.52617	0.305944
	24.6301	0			1.23438	0			5.51164	0			2.52617	0
	24.6728	0			1.23652	0			5.52119	0			2.53055	0
	24.6728	0			1.23652	0.0894454			5.52119	0			2.53055	0.305944
	24.7155	0			1.23866	0.0894454			5.53075	0			2.53493	0.305944
	24.7155	0			1.23866	0			5.53075	0			2.53493	0
	24.7582	0			1.2408	0			5.5403	0			2.5393	0
	24.7582	0			1.2408	0.0894454			5.5403	0			2.5393	0.305944
	24.8009	0			1.24294	0.0894454			5.54985	0			2.54368	0.305944
	24.8009	0			1.24294	0			5.54985	0			2.54368	0
	24.8436	0			1.24507	0			5.5594	0			2.54806	0
	24.8436	0			1.24507	0.0894454			5.5594	0			2.54806	0.305944
	24.8863	0			1.24721	0.0894454			5.56896	0			2.55244	0.305944
	24.8863	0			1.24721	0			5.56896	0			2.55244	0
	24.929	0			1.24935	0			5.57851	0			2.55682	0
	24.929	0			1.24935	0.0894454			5.57851	0			2.55682	0.305944
	24.9716	0			1.25149	0.0894454			5.58806	0			2.56119	0.305944
	24.9716	0			1.25149	0			5.58806	0			2.56119	0
	25.0143	0			1.25363	0			5.59761	0			2.56557	0
	25.0143	0			1.25363	0.0894454			5.59761	0			2.56557	0.305944
	25.057	0			1.25577	0.0894454			5.60716	0			2.56995	0.305944
	25.057	0			1.25577	0			5.60716	0			2.56995	0
	25.0997	0			1.25791	0			5.61672	0			2.57433	0
	25.0997	0			1.25791	0.0894454			5.61672	0			2.57433	0.305944
	25.1424	0			1.26005	0.0894454			5.62627	0			2.57871	0.305944
	25.1424	0			1.26005	0			5.62627	0			2.57871	0
	25.1851	0			1.26219	0			5.63582	0			2.58308	0
	25.1851	0			1.26219	0.0894454			5.63582	0			2.58308	0.305944
	25.2278	0			1.26433	0.0894454			5.64537	0			2.58746	0.305944
	25.2278	0			1.26433	0			5.64537	0			2.58746	0
	25.2704	0			1.26647	0			5.65493	0			2.59184	0
	25.2704	0			1.26647	0.0894454			5.65493	0			2.59184	0.305944
	25.3131	0			1.26861	0.0894454			5.66448	0			2.59622	0.305944
	25.3131	0			1.26861	0			5.66448	0			2.59622	0
	25.3558	0			1.27075	0			5.67403	0			2.6006	0
	25.3558	0			1.27075	0.0894454			5.67403	0			2.6006	0.305944
	25.3985	0			1.27289	0.0894454			5.68358	0			2.60498	0.305944
	25.3985	0			1.27289	0			5.68358	0			2.60498	0
	25.4412	0			1.27502	0			5.69313	0			2.60935	0
	25.4412	0			1.27502	0.0894454			5.69313	0			2.60935	0.305944
	25.4839	0			1.27716	0.0894454			5.70269	0			2.61373	0.305944
	25.4839	0			1.27716	0			5.70269	0			2.61373	0
	25.5266	0			1.2793	0			5.71224	0			2.61811	0
	25.5266	0			1.2793	0.0894454			5.71224	0			2.61811	0.305944
	25.5693	0			1.28144	0.0894454			5.72179	0			2.62249	0.305944
	25.5693	0			1.28144	0			5.72179	0			2.62249	0
	25.6119	0			1.28358	0			5.73134	0			2.62687	0
	25.6119	0			1.28358	0.0894454			5.73134	0			2.62687	0.305944
	25.6546	0			1.28572	0.0894454			5.7409	0			2.63124	0.305944
	25.6546	0			1.28572	0			5.7409	0			2.63124	0
	25.6973	0			1.28786	0			5.75045	0			2.63562	0
	25.6973	0			1.28786	0.0894454			5.75045	0			2.63562	0.305944
	25.74	0			1.29	0.0894454			5.76	0			2.64	0.305944
	25.74	0			1.29	0			5.76	0			2.64	0
	25.7827	0			1.29214	0			5.76955	0			2.64438	0
	25.7827	0			1.29214	0.0894454			5.76955	0			2.64438	0.305944
	25.8254	0			1.29428	0.0894454			5.7791	0			2.64876	0.305944
	25.8254	0			1.29428	0			5.7791	0			2.64876	0
	25.8681	0			1.29642	0			5.78866	0			2.65313	0
	25.8681	0			1.29642	0.0894454			5.78866	0			2.65313	0.305944
	25.9107	0			1.29856	0.0894454			5.79821	0			2.65751	0.305944
	25.9107	0			1.29856	0			5.79821	0			2.65751	0
	25.9534	0			1.3007	0			5.80776	0			2.66189	0
	25.9534	0			1.3007	0.0894454			5.80776	0			2.66189	0.305944
	25.9961	0			1.30284	0.0894454			5.81731	0			2.66627	0.305944
	25.9961	0			1.30284	0			5.81731	0			2.66627	0
	26.0388	0			1.30498	0			5.82687	0			2.67065	0
	26.0388	0			1.30498	0.0894454			5.82687	0			2.67065	0.305944
	26.0815	0			1.30711	0.0894454			5.83642	0			2.67502	0.305944
	26.0815	0			1.30711	0			5.83642	0			2.67502	0
	26.1242	0			1.30925	0			5.84597	0			2.6794	0
	26.1242	0			1.30925	0.0894454			5.84597	0			2.6794	0.305944
	26.1669	0			1.31139	0.0894454			5.85552	0			2.68378	0.305944
	26.1669	0			1.31139	0			5.85552	0			2.68378	0
	26.2096	0			1.31353	0			5.86507	0			2.68816	0
	26.2096	0			1.31353	0.0894454			5.86507	0			2.68816	0.305944
	26.2522	0			1.31567	0.0894454			5.87463	0			2.69254	0.305944
	26.2522	0			1.31567	0			5.87463	0			2.69254	0
	26.2949	0			1.31781	0			5.88418	0			2.69692	0
	26.2949	0			1.31781	0.0894454			5.88418	0			2.69692	0.305944
	26.3376	0			1.31995	0.0894454			5.89373	0			2.70129	0.305944
	26.3376	0			1.31995	0			5.89373	0			2.70129	0
	26.3803	0			1.32209	0			5.90328	0			2.70567	0
	26.3803	0			1.32209	0.0894454			5.90328	0			2.70567	0.305944
	26.423	0			1.32423	0.0894454			5.91284	0			2.71005	0.305944
	26.423	0			1.32423	0			5.91284	0			2.71005	0
	26.4657	0			1.32637	0			5.92239	0			2.71443	0
	26.4657	0			1.32637	0.0894454			5.92239	0			2.71443	0.305944
	26.5084	0			1.32851	0.0894454			5.93194	0			2.71881	0.305944
	26.5084	0			1.32851	0			5.93194	0			2.71881	0
	26.551	0			1.33065	0			5.94149	0			2.72318	0
	26.551	0			1.33065	0.0894454			5.94149	0			2.72318	0.305944
	26.5937	0			1.33279	0.0894454			5.95104	0			2.72756	0.305944
	26.5937	0			1.33279	0			5.95104	0			2.72756	0
	26.6364	0			1.33493	0			5.9606	0			2.73194	0
	26.6364	0			1.33493	0.0894454			5.9606	0			2.73194	0.305944
	26.6791	0			1.33706	0.0894454			5.97015	0			2.73632	0.305944
	26.6791	0			1.33706	0			5.97015	0			2.73632	0
	26.7218	0			1.3392	0			5.9797	0			2.7407	0
	26.7218	0			1.3392	0.0894454			5.9797	0			2.7407	0.305944
	26.7645	0			1.34134	0.0894454			5.98925	0			2.74507	0.305944
	26.7645	0			1.34134	0			5.98925	0			2.74507	0
	26.8072	0			1.34348	0			5.99881	0			2.74945	0
	26.8072	0			1.34348	0.0894454			5.99881	0			2.74945	0.305944
	26.8499	0			1.34562	0.0894454			6.00836	0			2.75383	0.305944
	26.8499	0			1.34562	0			6.00836	0			2.75383	0
	26.8925	0			1.34776	0			6.01791	0			2.75821	0
	26.8925	0			1.34776	0.0894454			6.01791	0			2.75821	0.305944
	26.9352	0			1.3499	0.0894454			6.02746	0			2.76259	0.305944
	26.9352	0			1.3499	0			6.02746	0			2.76259	0
	26.9779	0			1.35204	0			6.03701	0			2.76697	0
	26.9779	0			1.35204	0.0894454			6.03701	0			2.76697	0.305944
	27.0206	0			1.35418	0.0894454			6.04657	0			2.77134	0.305944
	27.0206	0			1.35418	0			6.04657	0			2.77134	0
	27.0633	0			1.35632	0			6.05612	0			2.77572	0
	27.0633	0			1.35632	0.0894454			6.05612	0			2.77572	0.305944
	27.106	0			1.35846	0.0894454			6.06567	0			2.7801	0.305944
	27.106	0			1.35846	0			6.06567	0			2.7801	0
	27.1487	0			1.3606	0			6.07522	0			2.78448	0
	27.1487	0			1.3606	0.0894454			6.07522	0			2.78448	0.305944
	27.1913	0			1.36274	0.0894454			6.08478	0			2.78886	0.305944
	27.1913	0			1.36274	0			6.08478	0			2.78886	0
	27.234	0			1.36488	0			6.09433	0			2.79323	0
	27.234	0			1.36488	0.0894454			6.09433	0			2.79323	0.305944
	27.2767	0			1.36701	0.0894454			6.10388	0			2.79761	0.305944
	27.2767	0			1.36701	0			6.10388	0			2.79761	0
	27.3194	0			1.36915	0			6.11343	0			2.80199	0
	27.3194	0			1.36915	0.0894454			6.11343	0			2.80199	0.305944
	27.3621	0			1.37129	0.0894454			6.12299	0			2.80637	0.305944
	27.3621	0			1.37129	0			6.12299	0			2.80637	0
	27.4048	0			1.37343	0			6.13254	0			2.81075	0
	27.4048	0			1.37343	0.0894454			6.13254	0			2.81075	0.305944
	27.4475	0			1.37557	0.0894454			6.14209	0			2.81512	0.305944
	27.4475	0			1.37557	0			6.14209	0			2.81512	0
	27.4901	0			1.37771	0			6.15164	0			2.8195	0
	27.4901	0			1.37771	0.0894454			6.15164	0			2.8195	0.305944
	27.5328	0			1.37985	0.0894454			6.16119	0			2.82388	0.305944
	27.5328	0			1.37985	0			6.16119	0			2.82388	0
	27.5755	0			1.38199	0			6.17075	0			2.82826	0
	27.5755	0			1.38199	0.0894454			6.17075	0			2.82826	0.305944
	27.6182	0			1.38413	0.0894454			6.1803	0			2.83264	0.305944
	27.6182	0			1.38413	0			6.1803	0			2.83264	0
	27.6609	0			1.38627	0			6.18985	0			2.83701	0
	27.6609	0			1.38627	0.0894454			6.18985	0			2.83701	0.305944
	27.7036	0			1.38841	0.0894454			6.1994	0			2.84139	0.305944
	27.7036	0			1.38841	0			6.1994	0			2.84139	0
	27.7463	0			1.39055	0			6.20896	0			2.84577	0
	27.7463	0			1.39055	0.0894454			6.20896	0			2.84577	0.305944
	27.789	0			1.39269	0.0894454			6.21851	0			2.85015	0.305944
	27.789	0			1.39269	0			6.21851	0			2.85015	0
	27.8316	0			1.39483	0			6.22806	0			2.85453	0
	27.8316	0			1.39483	0.0894454			6.22806	0			2.85453	0.305944
	27.8743	0			1.39697	0.0894454			6.23761	0			2.85891	0.305944
	27.8743	0			1.39697	0			6.23761	0			2.85891	0
	27.917	0			1.3991	0			6.24716	0			2.86328	0
	27.917	0			1.3991	0.0894454			6.24716	0			2.86328	0.305944
	27.9597	0			1.40124	0.0894454			6.25672	0			2.86766	0.305944
	27.9597	0			1.40124	0			6.25672	0			2.86766	0
	28.0024	0			1.40338	0			6.26627	0			2.87204	0
	28.0024	0			1.40338	0.0894454			6.26627	0			2.87204	0.305944
	28.0451	0			1.40552	0.0894454			6.27582	0			2.87642	0.305944
	28.0451	0			1.40552	0			6.27582	0			2.87642	0
	28.0878	0			1.40766	0			6.28537	0			2.8808	0
	28.0878	0			1.40766	0.0894454			6.28537	0			2.8808	0.305944
	28.1304	0			1.4098	0.0894454			6.29493	0			2.88517	0.305944
	28.1304	0			1.4098	0			6.29493	0			2.88517	0
	28.1731	0			1.41194	0			6.30448	0			2.88955	0
	28.1731	0			1.41194	0.0894454			6.30448	0			2.88955	0.305944
	28.2158	0			1.41408	0.0894454			6.31403	0			2.89393	0.305944
	28.2158	0			1.41408	0			6.31403	0			2.89393	0
	28.2585	0			1.41622	0			6.32358	0			2.89831	0
	28.2585	0			1.41622	0.0894454			6.32358	0			2.89831	0.305944
	28.3012	0			1.41836	0.0894454			6.33313	0			2.90269	0.305944
	28.3012	0			1.41836	0			6.33313	0			2.90269	0
	28.3439	0			1.4205	0			6.34269	0			2.90706	0
	28.3439	0			1.4205	0.0894454			6.34269	0			2.90706	0.305944
	28.3866	0			1.42264	0.0894454			6.35224	0			2.91144	0.305944
	28.3866	0			1.42264	0			6.35224	0			2.91144	0
	28.4293	0			1.42478	0			6.36179	0			2.91582	0
	28.4293	0			1.42478	0.0894454			6.36179	0			2.91582	0.305944
	28.4719	0			1.42692	0.0894454			6.37134	0			2.9202	0.305944
	28.4719	0			1.42692	0			6.37134	0			2.9202	0
	28.5146	0			1.42905	0			6.3809	0			2.92458	0
	28.5146	0			1.42905	0.0894454			6.3809	0			2.92458	0.305944
	28.5573	0			1.43119	0.0894454			6.39045	0			2.92896	0.305944
	28.5573	0			1.43119	0			6.39045	0			2.92896	0
	28.6	0			1.43333	0			6.4	0			2.93333	0
	28.6	0			1.43333	0.0894454			6.4	0			2.93333	0.305944
	28.6427	0			1.43547	0.0894454			6.40955	0			2.93771	0.305944
	28.6427	0			1.43547	0			6.40955	0			2.93771	0
	28.6854	0			1.43761	0			6.4191	0			2.94209	0
	28.6854	0			1.43761	0.0894454			6.4191	0			2.94209	0.305944
	28.7281	0			1.43975	0.0894454			6.42866	0			2.94647	0.305944
	28.7281	0			1.43975	0			6.42866	0			2.94647	0
	28.7707	0			1.44189	0			6.43821	0			2.95085	0
	28.7707	0			1.44189	0.0894454			6.43821	0			2.95085	0.305944
	28.8134	0			1.44403	0.0894454			6.44776	0			2.95522	0.305944
	28.8134	0			1.44403	0			6.44776	0			2.95522	0
	28.8561	0			1.44617	0			6.45731	0			2.9596	0
	28.8561	0			1.44617	0.0894454			6.45731	0			2.9596	0.305944
	28.8988	0			1.44831	0.0894454			6.46687	0			2.96398	0.305944
	28.8988	0			1.44831	0			6.46687	0			2.96398	0
	28.9415	0			1.45045	0			6.47642	0			2.96836	0
	28.9415	0			1.45045	0.0894454			6.47642	0			2.96836	0.305944
	28.9842	0			1.45259	0.0894454			6.48597	0			2.97274	0.305944
	28.9842	0			1.45259	0			6.48597	0			2.97274	0
	29.0269	0			1.45473	0			6.49552	0			2.97711	0
	29.0269	0			1.45473	0.0894454			6.49552	0			2.97711	0.305944
	29.0696	0			1.45687	0.0894454			6.50507	0			2.98149	0.305944
	29.0696	0			1.45687	0			6.50507	0			2.98149	0
	29.1122	0			1.459	0			6.51463	0			2.98587	0
	29.1122	0			1.459	0.0894454			6.51463	0			2.98587	0.305944
	29.1549	0			1.46114	0.0894454			6.52418	0			2.99025	0.305944
	29.1549	0			1.46114	0			6.52418	0			2.99025	0
	29.1976	0			1.46328	0			6.53373	0			2.99463	0
	29.1976	0			1.46328	0.0894454			6.53373	0			2.99463	0.305944
	29.2403	0			1.46542	0.0894454			6.54328	0			2.999	0.305944
	29.2403	0			1.46542	0			6.54328	0			2.999	0
	29.283	0			1.46756	0			6.55284	0			3.00338	0
	29.283	0			1.46756	0.0894454			6.55284	0			3.00338	0.305944
	29.3257	0			1.4697	0.0894454			6.56239	0			3.00776	0.305944
	29.3257	0			1.4697	0			6.56239	0			3.00776	0
	29.3684	0			1.47184	0			6.57194	0			3.01214	0
	29.3684	0			1.47184	0.0894454			6.57194	0			3.01214	0.305944
	29.411	0			1.47398	0.0894454			6.58149	0			3.01652	0.305944
	29.411	0			1.47398	0			6.58149	0			3.01652	0
	29.4537	0			1.47612	0			6.59104	0			3.0209	0
	29.4537	0			1.47612	0.0894454			6.59104	0			3.0209	0.305944
	29.4964	0			1.47826	0.0894454			6.6006	0			3.02527	0.305944
	29.4964	0			1.47826	0			6.6006	0			3.02527	0
	29.5391	0			1.4804	0			6.61015	0			3.02965	0
	29.5391	0			1.4804	0.0894454			6.61015	0			3.02965	0.305944
	29.5818	0			1.48254	0.0894454			6.6197	0			3.03403	0.305944
	29.5818	0			1.48254	0			6.6197	0			3.03403	0
	29.6245	0			1.48468	0			6.62925	0			3.03841	0
	29.6245	0			1.48468	0.0894454			6.62925	0			3.03841	0.305944
	29.6672	0			1.48682	0.0894454			6.63881	0			3.04279	0.305944
	29.6672	0			1.48682	0			6.63881	0			3.04279	0
	29.7099	0			1.48896	0			6.64836	0			3.04716	0
	29.7099	0			1.48896	0.0894454			6.64836	0			3.04716	0.305944
	29.7525	0			1.49109	0.0894454			6.65791	0			3.05154	0.305944
	29.7525	0			1.49109	0			6.65791	0			3.05154	0
	29.7952	0			1.49323	0			6.66746	0			3.05592	0
	29.7952	0			1.49323	0.0894454			6.66746	0			3.05592	0.305944
	29.8379	0			1.49537	0.0894454			6.67701	0			3.0603	0.305944
	29.8379	0			1.49537	0			6.67701	0			3.0603	0
	29.8806	0			1.49751	0			6.68657	0			3.06468	0
	29.8806	0			1.49751	0.0894454			6.68657	0			3.06468	0.305944
	29.9233	0			1.49965	0.0894454			6.69612	0			3.06905	0.305944
	29.9233	0			1.49965	0			6.69612	0			3.06905	0
	29.966	0			1.50179	0			6.70567	0			3.07343	0
	29.966	0			1.50179	0.0894454			6.70567	0			3.07343	0.305944
	30.0087	0			1.50393	0.0894454			6.71522	0			3.07781	0.305944
	30.0087	0			1.50393	0			6.71522	0			3.07781	0
	30.0513	0			1.50607	0			6.72478	0			3.08219	0
	30.0513	0			1.50607	0.0894454			6.72478	0			3.08219	0.305944
	30.094	0			1.50821	0.0894454			6.73433	0			3.08657	0.305944
	30.094	0			1.50821	0			6.73433	0			3.08657	0
	30.1367	0			1.51035	0			6.74388	0			3.09095	0
	30.1367	0			1.51035	0.0894454			6.74388	0			3.09095	0.305944
	30.1794	0			1.51249	0.0894454			6.75343	0			3.09532	0.305944
	30.1794	0			1.51249	0			6.75343	0			3.09532	0
	30.2221	0			1.51463	0			6.76299	0			3.0997	0
	30.2221	0			1.51463	0.0894454			6.76299	0			3.0997	0.305944
	30.2648	0			1.51677	0.0894454			6.77254	0			3.10408	0.305944
	30.2648	0			1.51677	0			6.77254	0			3.10408	0
	30.3075	0			1.51891	0			6.78209	0			3.10846	0
	30.3075	0			1.51891	0.0894454			6.78209	0			3.10846	0.305944
	30.3501	0			1.52104	0.0894454			6.79164	0			3.11284	0.305944
	30.3501	0			1.52104	0			6.79164	0			3.11284	0
	30.3928	0			1.52318	0			6.80119	0			3.11721	0
	30.3928	0			1.52318	0.0894454			6.80119	0			3.11721	0.305944
	30.4355	0			1.52532	0.0894454			6.81075	0			3.12159	0.305944
	30.4355	0			1.52532	0			6.81075	0			3.12159	0
	30.4782	0			1.52746	0			6.8203	0			3.12597	0
	30.4782	0			1.52746	0.0894454			6.8203	0			3.12597	0.305944
	30.5209	0			1.5296	0.0894454			6.82985	0			3.13035	0.305944
	30.5209	0			1.5296	0			6.82985	0			3.13035	0
	30.5636	0			1.53174	0			6.8394	0			3.13473	0
	30.5636	0			1.53174	0.0894454			6.8394	0			3.13473	0.305944
	30.6063	0			1.53388	0.0894454			6.84896	0			3.1391	0.305944
	30.6063	0			1.53388	0			6.84896	0			3.1391	0
	30.649	0			1.53602	0			6.85851	0			3.14348	0
	30.649	0			1.53602	0.0894454			6.85851	0			3.14348	0.305944
	30.6916	0			1.53816	0.0894454			6.86806	0			3.14786	0.305944
	30.6916	0			1.53816	0			6.86806	0			3.14786	0
	30.7343	0			1.5403	0			6.87761	0			3.15224	0
	30.7343	0			1.5403	0.0894454			6.87761	0			3.15224	0.305944
	30.777	0			1.54244	0.0894454			6.88716	0			3.15662	0.305944
	30.777	0			1.54244	0			6.88716	0			3.15662	0
	30.8197	0			1.54458	0			6.89672	0			3.161	0
	30.8197	0			1.54458	0.0894454			6.89672	0			3.161	0.305944
	30.8624	0			1.54672	0.0894454			6.90627	0			3.16537	0.305944
	30.8624	0			1.54672	0			6.90627	0			3.16537	0
	30.9051	0			1.54886	0			6.91582	0			3.16975	0
	30.9051	0			1.54886	0.0894454			6.91582	0			3.16975	0.305944
	30.9478	0			1.551	0.0894454			6.92537	0			3.17413	0.305944
	30.9478	0			1.551	0			6.92537	0			3.17413	0
	30.9904	0			1.55313	0			6.93493	0			3.17851	0
	30.9904	0			1.55313	0.0894454			6.93493	0			3.17851	0.305944
	31.0331	0			1.55527	0.0894454			6.94448	0			3.18289	0.305944
	31.0331	0			1.55527	0			6.94448	0			3.18289	0
	31.0758	0			1.55741	0			6.95403	0			3.18726	0
	31.0758	0			1.55741	0.0894454			6.95403	0			3.18726	0.305944
	31.1185	0			1.55955	0.0894454			6.96358	0			3.19164	0.305944
	31.1185	0			1.55955	0			6.96358	0			3.19164	0
	31.1612	0			1.56169	0			6.97313	0			3.19602	0
	31.1612	0			1.56169	0.0894454			6.97313	0			3.19602	0.305944
	31.2039	0			1.56383	0.0894454			6.98269	0			3.2004	0.305944
	31.2039	0			1.56383	0			6.98269	0			3.2004	0
	31.2466	0			1.56597	0			6.99224	0			3.20478	0
	31.2466	0			1.56597	0.0894454			6.99224	0			3.20478	0.305944
	31.2893	0			1.56811	0.0894454			7.00179	0			3.20915	0.305944
	31.2893	0			1.56811	0			7.00179	0			3.20915	0
	31.3319	0			1.57025	0			7.01134	0			3.21353	0
	31.3319	0			1.57025	0.0894454			7.01134	0			3.21353	0.305944
	31.3746	0			1.57239	0.0894454			7.0209	0			3.21791	0.305944
	31.3746	0			1.57239	0			7.0209	0			3.21791	0
	31.4173	0			1.57453	0			7.03045	0			3.22229	0
	31.4173	0			1.57453	0.0894454			7.03045	0			3.22229	0.305944
	31.46	0			1.57667	0.0894454			7.04	0			3.22667	0.305944
	31.46	0			1.57667	0			7.04	0			3.22667	0
	31.5027	0			1.57881	0			7.04955	0			3.23104	0
	31.5027	0			1.57881	0.0894454			7.04955	0			3.23104	0.305944
	31.5454	0			1.58095	0.0894454			7.0591	0			3.23542	0.305944
	31.5454	0			1.58095	0			7.0591	0			3.23542	0
	31.5881	0			1.58308	0			7.06866	0			3.2398	0
	31.5881	0			1.58308	0.0894454			7.06866	0			3.2398	0.305944
	31.6307	0			1.58522	0.0894454			7.07821	0			3.24418	0.305944
	31.6307	0			1.58522	0			7.07821	0			3.24418	0
	31.6734	0			1.58736	0			7.08776	0			3.24856	0
	31.6734	0			1.58736	0.0894454			7.08776	0			3.24856	0.305944
	31.7161	0			1.5895	0.0894454			7.09731	0			3.25294	0.305944
	31.7161	0			1.5895	0			7.09731	0			3.25294	0
	31.7588	0			1.59164	0			7.10687	0			3.25731	0
	31.7588	0			1.59164	0.0894454			7.10687	0			3.25731	0.305944
	31.8015	0			1.59378	0.0894454			7.11642	0			3.26169	0.305944
	31.8015	0			1.59378	0			7.11642	0			3.26169	0
	31.8442	0			1.59592	0			7.12597	0			3.26607	0
	31.8442	0			1.59592	0.0894454			7.12597	0			3.26607	0.305944
	31.8869	0			1.59806	0.0894454			7.13552	0			3.27045	0.305944
	31.8869	0			1.59806	0			7.13552	0			3.27045	0
	31.9296	0			1.6002	0			7.14507	0			3.27483	0
	31.9296	0			1.6002	0.0894454			7.14507	0			3.27483	0.305944
	31.9722	0			1.60234	0.0894454			7.15463	0			3.2792	0.305944
	31.9722	0			1.60234	0			7.15463	0			3.2792	0
	32.0149	0			1.60448	0			7.16418	0			3.28358	0
	32.0149	0			1.60448	0.0894454			7.16418	0			3.28358	0.305944
	32.0576	0			1.60662	0.0894454			7.17373	0			3.28796	0.305944
	32.0576	0			1.60662	0			7.17373	0			3.28796	0
	32.1003	0			1.60876	0			7.18328	0			3.29234	0
	32.1003	0			1.60876	0.0894454			7.18328	0			3.29234	0.305944
	32.143	0			1.6109	0.0894454			7.19284	0			3.29672	0.305944
	32.143	0			1.6109	0			7.19284	0			3.29672	0
	32.1857	0			1.61303	0			7.20239	0			3.30109	0
	32.1857	0			1.61303	0.0894454			7.20239	0			3.30109	0.305944
	32.2284	0			1.61517	0.0894454			7.21194	0			3.30547	0.305944
	32.2284	0			1.61517	0			7.21194	0			3.30547	0
	32.271	0			1.61731	0			7.22149	0			3.30985	0
	32.271	0			1.61731	0.0894454			7.22149	0			3.30985	0.305944
	32.3137	0			1.61945	0.0894454			7.23104	0			3.31423	0.305944
	32.3137	0			1.61945	0			7.23104	0			3.31423	0
	32.3564	0			1.62159	0			7.2406	0			3.31861	0
	32.3564	0			1.62159	0.0894454			7.2406	0			3.31861	0.305944
	32.3991	0			1.62373	0.0894454			7.25015	0			3.32299	0.305944
	32.3991	0			1.62373	0			7.25015	0			3.32299	0
	32.4418	0			1.62587	0			7.2597	0			3.32736	0
	32.4418	0			1.62587	0.0894454			7.2597	0			3.32736	0.305944
	32.4845	0			1.62801	0.0894454			7.26925	0			3.33174	0.305944
	32.4845	0			1.62801	0			7.26925	0			3.33174	0
	32.5272	0			1.63015	0			7.27881	0			3.33612	0
	32.5272	0			1.63015	0.0894454			7.27881	0			3.33612	0.305944
	32.5699	0			1.63229	0.0894454			7.28836	0			3.3405	0.305944
	32.5699	0			1.63229	0			7.28836	0			3.3405	0
	32.6125	0			1.63443	0			7.29791	0			3.34488	0
	32.6125	0			1.63443	0.0894454			7.29791	0			3.34488	0.305944
	32.6552	0			1.63657	0.0894454			7.30746	0			3.34925	0.305944
	32.6552	0			1.63657	0			7.30746	0			3.34925	0
	32.6979	0			1.63871	0			7.31701	0			3.35363	0
	32.6979	0			1.63871	0.0894454			7.31701	0			3.35363	0.305944
	32.7406	0			1.64085	0.0894454			7.32657	0			3.35801	0.305944
	32.7406	0			1.64085	0			7.32657	0			3.35801	0
	32.7833	0			1.64299	0			7.33612	0			3.36239	0
	32.7833	0			1.64299	0.0894454			7.33612	0			3.36239	0.305944
	32.826	0			1.64512	0.0894454			7.34567	0			3.36677	0.305944
	32.826	0			1.64512	0			7.34567	0			3.36677	0
	32.8687	0			1.64726	0			7.35522	0			3.37114	0
	32.8687	0			1.64726	0.0894454			7.35522	0			3.37114	0.305944
	32.9113	0			1.6494	0.0894454			7.36478	0			3.37552	0.305944
	32.9113	0			1.6494	0			7.36478	0			3.37552	0
	32.954	0			1.65154	0			7.37433	0			3.3799	0
	32.954	0			1.65154	0.0894454			7.37433	0			3.3799	0.305944
	32.9967	0			1.65368	0.0894454			7.38388	0			3.38428	0.305944
	32.9967	0			1.65368	0			7.38388	0			3.38428	0
	33.0394	0			1.65582	0			7.39343	0			3.38866	0
	33.0394	0			1.65582	0.0894454			7.39343	0			3.38866	0.305944
	33.0821	0			1.65796	0.0894454			7.40299	0			3.39303	0.305944
	33.0821	0			1.65796	0			7.40299	0			3.39303	0
	33.1248	0			1.6601	0			7.41254	0			3.39741	0
	33.1248	0			1.6601	0.0894454			7.41254	0			3.39741	0.305944
	33.1675	0			1.66224	0.0894454			7.42209	0			3.40179	0.305944
	33.1675	0			1.66224	0			7.42209	0			3.40179	0
	33.2101	0			1.66438	0			7.43164	0			3.40617	0
	33.2101	0			1.66438	0.0894454			7.43164	0			3.40617	0.305944
	33.2528	0			1.66652	0.0894454			7.44119	0			3.41055	0.305944
	33.2528	0			1.66652	0			7.44119	0			3.41055	0
	33.2955	0			1.66866	0			7.45075	0			3.41493	0
	33.2955	0			1.66866	0.0894454			7.45075	0			3.41493	0.305944
	33.3382	0			1.6708	0.0894454			7.4603	0			3.4193	0.305944
	33.3382	0			1.6708	0			7.4603	0			3.4193	0
	33.3809	0			1.67294	0			7.46985	0			3.42368	0
	33.3809	0			1.67294	0.0894454			7.46985	0			3.42368	0.305944
	33.4236	0			1.67507	0.0894454			7.4794	0			3.42806	0.305944
	33.4236	0			1.67507	0			7.4794	0			3.42806	0
	33.4663	0			1.67721	0			7.48896	0			3.43244	0
	33.4663	0			1.67721	0.0894454			7.48896	0			3.43244	0.305944
	33.509	0			1.67935	0.0894454			7.49851	0			3.43682	0.305944
	33.509	0			1.67935	0			7.49851	0			3.43682	0
	33.5516	0			1.68149	0			7.50806	0			3.44119	0
	33.5516	0			1.68149	0.0894454			7.50806	0			3.44119	0.305944
	33.5943	0			1.68363	0.0894454			7.51761	0			3.44557	0.305944
	33.5943	0			1.68363	0			7.51761	0			3.44557	0
	33.637	0			1.68577	0			7.52716	0			3.44995	0
	33.637	0			1.68577	0.0894454			7.52716	0			3.44995	0.305944
	33.6797	0			1.68791	0.0894454			7.53672	0			3.45433	0.305944
	33.6797	0			1.68791	0			7.53672	0			3.45433	0
	33.7224	0			1.69005	0			7.54627	0			3.45871	0
	33.7224	0			1.69005	0.0894454			7.54627	0			3.45871	0.305944
	33.7651	0			1.69219	0.0894454			7.55582	0			3.46308	0.305944
	33.7651	0			1.69219	0			7.55582	0			3.46308	0
	33.8078	0			1.69433	0			7.56537	0			3.46746	0
	33.8078	0			1.69433	0.0894454			7.56537	0			3.46746	0.305944
	33.8504	0			1.69647	0.0894454			7.57493	0			3.47184	0.305944
	33.8504	0			1.69647	0			7.57493	0			3.47184	0
	33.8931	0			1.69861	0			7.58448	0			3.47622	0
	33.8931	0			1.69861	0.0894454			7.58448	0			3.47622	0.305944
	33.9358	0			1.70075	0.0894454			7.59403	0			3.4806	0.305944
	33.9358	0			1.70075	0			7.59403	0			3.4806	0
	33.9785	0			1.70289	0			7.60358	0			3.48498	0
	33.9785	0			1.70289	0.0894454			7.60358	0			3.48498	0.305944
	34.0212	0			1.70502	0.0894454			7.61313	0			3.48935	0.305944
	34.0212	0			1.70502	0			7.61313	0			3.48935	0
	34.0639	0			1.70716	0			7.62269	0			3.49373	0
	34.0639	0			1.70716	0.0894454			7.62269	0			3.49373	0.305944
	34.1066	0			1.7093	0.0894454			7.63224	0			3.49811	0.305944
	34.1066	0			1.7093	0			7.63224	0			3.49811	0
	34.1493	0			1.71144	0			7.64179	0			3.50249	0
	34.1493	0			1.71144	0.0894454			7.64179	0			3.50249	0.305944
	34.1919	0			1.71358	0.0894454			7.65134	0			3.50687	0.305944
	34.1919	0			1.71358	0			7.65134	0			3.50687	0
	34.2346	0			1.71572	0			7.6609	0			3.51124	0
	34.2346	0			1.71572	0.0894454			7.6609	0			3.51124	0.305944
	34.2773	0			1.71786	0.0894454			7.67045	0			3.51562	0.305944
	34.2773	0			1.71786	0			7.67045	0			3.51562	0
	34.32	0			1.72	0			7.68	0			3.52	0
	34.32	0.00896539			1.72	0.268336			7.68	0.0200321			3.52	0
	34.3627	0.00896539			1.72214	0.268336			7.68955	0.0200321			3.52438	0
	34.3627	0			1.72214	0			7.68955	0			3.52438	0
	34.4054	0			1.72428	0			7.6991	0			3.52876	0
	34.4054	0.00896539			1.72428	0.268336			7.6991	0.0200321			3.52876	0
	34.4481	0.00896539			1.72642	0.268336			7.70866	0.0200321			3.53313	0
	34.4481	0			1.72642	0			7.70866	0			3.53313	0
	34.4907	0			1.72856	0			7.71821	0			3.53751	0
	34.4907	0.00896539			1.72856	0.268336			7.71821	0.0200321			3.53751	0
	34.5334	0.00896539			1.7307	0.268336			7.72776	0.0200321			3.54189	0
	34.5334	0			1.7307	0			7.72776	0			3.54189	0
	34.5761	0			1.73284	0			7.73731	0			3.54627	0
	34.5761	0.00896539			1.73284	0.268336			7.73731	0.0200321			3.54627	0
	34.6188	0.00896539			1.73498	0.268336			7.74687	0.0200321			3.55065	0
	34.6188	0			1.73498	0			7.74687	0			3.55065	0
	34.6615	0			1.73711	0			7.75642	0			3.55502	0
	34.6615	0.00896539			1.73711	0.268336			7.75642	0.0200321			3.55502	0
	34.7042	0.00896539			1.73925	0.268336			7.76597	0.0200321			3.5594	0
	34.7042	0			1.73925	0			7.76597	0			3.5594	0
	34.7469	0			1.74139	0			7.77552	0			3.56378	0
	34.7469	0.00896539			1.74139	0.268336			7.77552	0.0200321			3.56378	0
	34.7896	0.00896539			1.74353	0.268336			7.78507	0.0200321			3.56816	0
	34.7896	0			1.74353	0			7.78507	0			3.56816	0
	34.8322	0			1.74567	0			7.79463	0			3.57254	0
	34.8322	0.00896539			1.74567	0.268336			7.79463	0.0200321			3.57254	0
	34.8749	0.00896539			1.74781	0.268336			7.80418	0.0200321			3.57692	0
	34.8749	0			1.74781	0			7.80418	0			3.57692	0
	34.9176	0			1.74995	0			7.81373	0			3.58129	0
	34.9176	0.00896539			1.74995	0.268336			7.81373	0.0200321			3.58129	0
	34.9603	0.00896539			1.75209	0.268336			7.82328	0.0200321			3.58567	0
	34.9603	0			1.75209	0			7.82328	0			3.58567	0
	35.003	0			1.75423	0			7.83284	0			3.59005	0
	35.003	0.00896539			1.75423	0.268336			7.83284	0.0200321			3.59005	0
	35.0457	0.00896539			1.75637	0.268336			7.84239	0.0200321			3.59443	0
	35.0457	0			1.75637	0			7.84239	0			3.59443	0
	35.0884	0			1.75851	0			7.85194	0			3.59881	0
	35.0884	0.00896539			1.75851	0.268336			7.85194	0.0200321			3.59881	0
	35.131	0.00896539			1.76065	0.268336			7.86149	0.0200321			3.60318	0
	35.131	0			1.76065	0			7.86149	0			3.60318	0
	35.1737	0			1.76279	0			7.87104	0			3.60756	0
	35.1737	0.00896539			1.76279	0.268336			7.87104	0.0200321			3.60756	0
	35.2164	0.00896539			1.76493	0.268336			7.8806	0.0200321			3.61194	0
	35.2164	0			1.76493	0			7.8806	0			3.61194	0
	35.2591	0			1.76706	0			7.89015	0			3.61632	0
	35.2591	0.00896539			1.76706	0.268336			7.89015	0.0200321			3.61632	0
	35.3018	0.00896539			1.7692	0.268336			7.8997	0.0200321			3.6207	0
	35.3018	0			1.7692	0			7.8997	0			3.6207	0
	35.3445	0			1.77134	0			7.90925	0			3.62507	0
	35.3445	0.00896539			1.77134	0.268336			7.90925	0.0200321			3.62507	0
	35.3872	0.00896539			1.77348	0.268336			7.91881	0.0200321			3.62945	0
	35.3872	0			1.77348	0			7.91881	0			3.62945	0
	35.4299	0			1.77562	0			7.92836	0			3.63383	0
	35.4299	0.00896539			1.77562	0.268336			7.92836	0.0200321			3.63383	0
	35.4725	0.00896539			1.77776	0.268336			7.93791	0.0200321			3.63821	0
	35.4725	0			1.77776	0			7.93791	0			3.63821	0
	35.5152	0			1.7799	0			7.94746	0			3.64259	0
	35.5152	0.00896539			1.7799	0.268336			7.94746	0.0200321			3.64259	0
	35.5579	0.00896539			1.78204	0.268336			7.95701	0.0200321			3.64697	0
	35.5579	0			1.78204	0			7.95701	0			3.64697	0
	35.6006	0			1.78418	0			7.96657	0			3.65134	0
	35.6006	0.00896539			1.78418	0.268336			7.96657	0.0200321			3.65134	0
	35.6433	0.00896539			1.78632	0.268336			7.97612	0.0200321			3.65572	0
	35.6433	0			1.78632	0			7.97612	0			3.65572	0
	35.686	0			1.78846	0			7.98567	0			3.6601	0
	35.686	0.00896539			1.78846	0.268336			7.98567	0.0200321			3.6601	0
	35.7287	0.00896539			1.7906	0.268336			7.99522	0.0200321			3.66448	0
	35.7287	0			1.7906	0			7.99522	0			3.66448	0
	35.7713	0			1.79274	0			8.00478	0			3.66886	0
	35.7713	0.00896539			1.79274	0.268336			8.00478	0.0200321			3.66886	0
	35.814	0.00896539			1.79488	0.268336			8.01433	0.0200321			3.67323	0
	35.814	0			1.79488	0			8.01433	0			3.67323	0
	35.8567	0			1.79701	0			8.02388	0			3.67761	0
	35.8567	0.00896539			1.79701	0.268336			8.02388	0.0200321			3.67761	0
	35.8994	0.00896539			1.79915	0.268336			8.03343	0.0200321			3.68199	0
	35.8994	0			1.79915	0			8.03343	0			3.68199	0
	35.9421	0			1.80129	0			8.04299	0			3.68637	0
	35.9421	0.00896539			1.80129	0.268336			8.04299	0.0200321			3.68637	0
	35.9848	0.00896539			1.80343	0.268336			8.05254	0.0200321			3.69075	0
	35.9848	0			1.80343	0			8.05254	0			3.69075	0
	36.0275	0			1.80557	0			8.06209	0			3.69512	0
	36.0275	0.00896539			1.80557	0.268336			8.06209	0.0200321			3.69512	0
	36.0701	0.00896539			1.80771	0.268336			8.07164	0.0200321			3.6995	0
	36.0701	0			1.80771	0			8.07164	0			3.6995	0
	36.1128	0			1.80985	0			8.08119	0			3.70388	0
	36.1128	0.00896539			1.80985	0.268336			8.08119	0.0200321			3.70388	0
	36.1555	0.00896539			1.81199	0.268336			8.09075	0.0200321			3.70826	0
	36.1555	0			1.81199	0			8.09075	0			3.70826	0
	36.1982	0			1.81413	0			8.1003	0			3.71264	0
	36.1982	0.00896539			1.81413	0.268336			8.1003	0.0200321			3.71264	0
	36.2409	0.00896539			1.81627	0.268336			8.10985	0.0200321			3.71701	0
	36.2409	0			1.81627	0			8.10985	0			3.71701	0
	36.2836	0			1.81841	0			8.1194	0			3.72139	0
	36.2836	0.00896539			1.81841	0.268336			8.1194	0.0200321			3.72139	0
	36.3263	0.00896539			1.82055	0.268336			8.12896	0.0200321			3.72577	0
	36.3263	0			1.82055	0			8.12896	0			3.72577	0
	36.369	0			1.82269	0			8.13851	0			3.73015	0
	36.369	0.00896539			1.82269	0.268336			8.13851	0.0200321			3.73015	0
	36.4116	0.00896539			1.82483	0.268336			8.14806	0.0200321			3.73453	0
	36.4116	0			1.82483	0			8.14806	0			3.73453	0
	36.4543	0			1.82697	0			8.15761	0			3.73891	0
	36.4543	0.00896539			1.82697	0.268336			8.15761	0.0200321			3.73891	0
	36.497	0.00896539			1.8291	0.268336			8.16716	0.0200321			3.74328	0
	36.497	0			1.8291	0			8.16716	0			3.74328	0
	36.5397	0			1.83124	0			8.17672	0			3.74766	0
	36.5397	0.00896539			1.83124	0.268336			8.17672	0.0200321			3.74766	0
	36.5824	0.00896539			1.83338	0.268336			8.18627	0.0200321			3.75204	0
	36.5824	0			1.83338	0			8.18627	0			3.75204	0
	36.6251	0			1.83552	0			8.19582	0			3.75642	0
	36.6251	0.00896539			1.83552	0.268336			8.19582	0.0200321			3.75642	0
	36.6678	0.00896539			1.83766	0.268336			8.20537	0.0200321			3.7608	0
	36.6678	0			1.83766	0			8.20537	0			3.7608	0
	36.7104	0			1.8398	0			8.21493	0			3.76517	0
	36.7104	0.00896539			1.8398	0.268336			8.21493	0.0200321			3.76517	0
	36.7531	0.00896539			1.84194	0.268336			8.22448	0.0200321			3.76955	0
	36.7531	0			1.84194	0			8.22448	0			3.76955	0
	36.7958	0			1.84408	0			8.23403	0			3.77393	0
	36.7958	0.00896539			1.84408	0.268336			8.23403	0.0200321			3.77393	0
	36.8385	0.00896539			1.84622	0.268336			8.24358	0.0200321			3.77831	0
	36.8385	0			1.84622	0			8.24358	0			3.77831	0
	36.8812	0			1.84836	0			8.25313	0			3.78269	0
	36.8812	0.00896539			1.84836	0.268336			8.25313	0.0200321			3.78269	0
	36.9239	0.00896539			1.8505	0.268336			8.26269	0.0200321			3.78706	0
	36.9239	0			1.8505	0			8.26269	0			3.78706	0
	36.9666	0			1.85264	0			8.27224	0			3.79144	0
	36.9666	0.00896539			1.85264	0.268336			8.27224	0.0200321			3.79144	0
	37.0093	0.00896539			1.85478	0.268336			8.28179	0.0200321			3.79582	0
	37.0093	0			1.85478	0			8.28179	0			3.79582	0
	37.0519	0			1.85692	0			8.29134	0			3.8002	0
	37.0519	0.00896539			1.85692	0.268336			8.29134	0.0200321			3.8002	0
	37.0946	0.00896539			1.85905	0.268336			8.3009	0.0200321			3.80458	0
	37.0946	0			1.85905	0			8.3009	0			3.80458	0
	37.1373	0			1.86119	0			8.31045	0			3.80896	0
	37.1373	0.00896539			1.86119	0.268336			8.31045	0.0200321			3.80896	0
	37.18	0.00896539			1.86333	0.268336			8.32	0.0200321			3.81333	0
	37.18	0			1.86333	0			8.32	0			3.81333	0
	37.2227	0			1.86547	0			8.32955	0			3.81771	0
	37.2227	0.00896539			1.86547	0.268336			8.32955	0.0200321			3.81771	0
	37.2654	0.00896539			1.86761	0.268336			8.3391	0.0200321			3.82209	0
	37.2654	0			1.86761	0			8.3391	0			3.82209	0
	37.3081	0			1.86975	0			8.34866	0			3.82647	0
	37.3081	0.00896539			1.86975	0.268336			8.34866	0.0200321			3.82647	0
	37.3507	0.00896539			1.87189	0.268336			8.35821	0.0200321			3.83085	0
	37.3507	0			1.87189	0			8.35821	0			3.83085	0
	37.3934	0			1.87403	0			8.36776	0			3.83522	0
	37.3934	0.00896539			1.87403	0.268336			8.36776	0.0200321			3.83522	0
	37.4361	0.00896539			1.87617	0.268336			8.37731	0.0200321			3.8396	0
	37.4361	0			1.87617	0			8.37731	0			3.8396	0
	37.4788	0			1.87831	0			8.38687	0			3.84398	0
	37.4788	0.00896539			1.87831	0.268336			8.38687	0.0200321			3.84398	0
	37.5215	0.00896539			1.88045	0.268336			8.39642	0.0200321			3.84836	0
	37.5215	0			1.88045	0			8.39642	0			3.84836	0
	37.5642	0			1.88259	0			8.40597	0			3.85274	0
	37.5642	0.00896539			1.88259	0.268336			8.40597	0.0200321			3.85274	0
	37.6069	0.00896539			1.88473	0.268336			8.41552	0.0200321			3.85711	0
	37.6069	0			1.88473	0			8.41552	0			3.85711	0
	37.6496	0			1.88687	0			8.42507	0			3.86149	0
	37.6496	0.00896539			1.88687	0.268336			8.42507	0.0200321			3.86149	0
	37.6922	0.00896539			1.889	0.268336			8.43463	0.0200321			3.86587	0
	37.6922	0			1.889	0			8.43463	0			3.86587	0
	37.7349	0			1.89114	0			8.44418	0			3.87025	0
	37.7349	0.00896539			1.89114	0.268336			8.44418	0.0200321			3.87025	0
	37.7776	0.00896539			1.89328	0.268336			8.45373	0.0200321			3.87463	0
	37.7776	0			1.89328	0			8.45373	0			3.87463	0
	37.8203	0			1.89542	0			8.46328	0			3.879	0
	37.8203	0.00896539			1.89542	0.268336			8.46328	0.0200321			3.879	0
	37.863	0.00896539			1.89756	0.268336			8.47284	0.0200321			3.88338	0
	37.863	0			1.89756	0			8.47284	0			3.88338	0
	37.9057	0			1.8997	0			8.48239	0			3.88776	0
	37.9057	0.00896539			1.8997	0.268336			8.48239	0.0200321			3.88776	0
	37.9484	0.00896539			1.90184	0.268336			8.49194	0.0200321			3.89214	0
	37.9484	0			1.90184	0			8.49194	0			3.89214	0
	37.991	0			1.90398	0			8.50149	0			3.89652	0
	37.991	0.00896539			1.90398	0.268336			8.50149	0.0200321			3.89652	0
	38.0337	0.00896539			1.90612	0.268336			8.51104	0.0200321			3.9009	0
	38.0337	0			1.90612	0			8.51104	0			3.9009	0
	38.0764	0			1.90826	0			8.5206	0			3.90527	0
	38.0764	0.00896539			1.90826	0.268336			8.5206	0.0200321			3.90527	0
	38.1191	0.00896539			1.9104	0.268336			8.53015	0.0200321			3.90965	0
	38.1191	0			1.9104	0			8.53015	0			3.90965	0
	38.1618	0			1.91254	0			8.5397	0			3.91403	0
	38.1618	0.00896539			1.91254	0.268336			8.5397	0.0200321			3.91403	0
	38.2045	0.00896539			1.91468	0.268336			8.54925	0.0200321			3.91841	0
	38.2045	0			1.91468	0			8.54925	0			3.91841	0
	38.2472	0			1.91682	0			8.55881	0			3.92279	0
	38.2472	0.00896539			1.91682	0.268336			8.55881	0.0200321			3.92279	0
	38.2899	0.00896539			1.91896	0.268336			8.56836	0.0200321			3.92716	0
	38.2899	0			1.91896	0			8.56836	0			3.92716	0
	38.3325	0			1.92109	0			8.57791	0			3.93154	0
	38.3325	0.00896539			1.92109	0.268336			8.57791	0.0200321			3.93154	0
	38.3752	0.00896539			1.92323	0.268336			8.58746	0.0200321			3.93592	0
	38.3752	0			1.92323	0			8.58746	0			3.93592	0
	38.4179	0			1.92537	0			8.59701	0			3.9403	0
	38.4179	0.00896539			1.92537	0.268336			8.59701	0.0200321			3.9403	0
	38.4606	0.00896539			1.92751	0.268336			8.60657	0.0200321			3.94468	0
	38.4606	0			1.92751	0			8.60657	0			3.94468	0
	38.5033	0			1.92965	0			8.61612	0			3.94905	0
	38.5033	0.00896539			1.92965	0.268336			8.61612	0.0200321			3.94905	0
	38.546	0.00896539			1.93179	0.268336			8.62567	0.0200321			3.95343	0
	38.546	0			1.93179	0			8.62567	0			3.95343	0
	38.5887	0			1.93393	0			8.63522	0			3.95781	0
	38.5887	0.00896539			1.93393	0.268336			8.63522	0.0200321			3.95781	0
	38.6313	0.00896539			1.93607	0.268336			8.64478	0.0200321			3.96219	0
	38.6313	0			1.93607	0			8.64478	0			3.96219	0
	38.674	0			1.93821	0			8.65433	0			3.96657	0
	38.674	0.00896539			1.93821	0.268336			8.65433	0.0200321			3.96657	0
	38.7167	0.00896539			1.94035	0.268336			8.66388	0.0200321			3.97095	0
	38.7167	0			1.94035	0			8.66388	0			3.97095	0
	38.7594	0			1.94249	0			8.67343	0			3.97532	0
	38.7594	0.00896539			1.94249	0.268336			8.67343	0.0200321			3.97532	0
	38.8021	0.00896539			1.94463	0.268336			8.68299	0.0200321			3.9797	0
	38.8021	0			1.94463	0			8.68299	0			3.9797	0
	38.8448	0			1.94677	0			8.69254	0			3.98408	0
	38.8448	0.00896539			1.94677	0.268336			8.69254	0.0200321			3.98408	0
	38.8875	0.00896539			1.94891	0.268336			8.70209	0.0200321			3.98846	0
	38.8875	0			1.94891	0			8.70209	0			3.98846	0
	38.9301	0			1.95104	0			8.71164	0			3.99284	0
	38.9301	0.00896539			1.95104	0.268336			8.71164	0.0200321			3.99284	0
	38.9728	0.00896539			1.95318	0.268336			8.72119	0.0200321			3.99721	0
	38.9728	0			1.95318	0			8.72119	0			3.99721	0
	39.0155	0			1.95532	0			8.73075	0			4.00159	0
	39.0155	0.00896539			1.95532	0.268336			8.73075	0.0200321			4.00159	0
	39.0582	0.00896539			1.95746	0.268336			8.7403	0.0200321			4.00597	0
	39.0582	0			1.95746	0			8.7403	0			4.00597	0
	39.1009	0			1.9596	0			8.74985	0			4.01035	0
	39.1009	0.00896539			1.9596	0.268336			8.74985	0.0200321			4.01035	0
	39.1436	0.00896539			1.96174	0.268336			8.7594	0.0200321			4.01473	0
	39.1436	0			1.96174	0			8.7594	0			4.01473	0
	39.1863	0			1.96388	0			8.76896	0			4.0191	0
	39.1863	0.00896539			1.96388	0.268336			8.76896	0.0200321			4.0191	0
	39.229	0.00896539			1.96602	0.268336			8.77851	0.0200321			4.02348	0
	39.229	0			1.96602	0			8.77851	0			4.02348	0
	39.2716	0			1.96816	0			8.78806	0			4.02786	0
	39.2716	0.00896539			1.96816	0.268336			8.78806	0.0200321			4.02786	0
	39.3143	0.00896539			1.9703	0.268336			8.79761	0.0200321			4.03224	0
	39.3143	0			1.9703	0			8.79761	0			4.03224	0
	39.357	0			1.97244	0			8.80716	0			4.03662	0
	39.357	0.00896539			1.97244	0.268336			8.80716	0.0200321			4.03662	0
	39.3997	0.00896539			1.97458	0.268336			8.81672	0.0200321			4.041	0
	39.3997	0			1.97458	0			8.81672	0			4.041	0
	39.4424	0			1.97672	0			8.82627	0			4.04537	0
	39.4424	0.00896539			1.97672	0.268336			8.82627	0.0200321			4.04537	0
	39.4851	0.00896539			1.97886	0.268336			8.83582	0.0200321			4.04975	0
	39.4851	0			1.97886	0			8.83582	0			4.04975	0
	39.5278	0			1.981	0			8.84537	0			4.05413	0
	39.5278	0.00896539			1.981	0.268336			8.84537	0.0200321			4.05413	0
	39.5704	0.00896539			1.98313	0.268336			8.85493	0.0200321			4.05851	0
	39.5704	0			1.98313	0			8.85493	0			4.05851	0
	39.6131	0			1.98527	0			8.86448	0			4.06289	0
	39.6131	0.00896539			1.98527	0.268336			8.86448	0.0200321			4.06289	0
	39.6558	0.00896539			1.98741	0.268336			8.87403	0.0200321			4.06726	0
	39.6558	0			1.98741	0			8.87403	0			4.06726	0
	39.6985	0			1.98955	0			8.88358	0			4.07164	0
	39.6985	0.00896539			1.98955	0.268336			8.88358	0.0200321			4.07164	0
	39.7412	0.00896539			1.99169	0.268336			8.89313	0.0200321			4.07602	0
	39.7412	0			1.99169	0			8.89313	0			4.07602	0
	39.7839	0			1.99383	0			8.90269	0			4.0804	0
	39.7839	0.00896539			1.99383	0.268336			8.90269	0.0200321			4.0804	0
	39.8266	0.00896539			1.99597	0.268336			8.91224	0.0200321			4.08478	0
	39.8266	0			1.99597	0			8.91224	0			4.08478	0
	39.8693	0			1.99811	0			8.92179	0			4.08915	0
	39.8693	0.00896539			1.99811	0.268336			8.92179	0.0200321			4.08915	0
	39.9119	0.00896539			2.00025	0.268336			8.93134	0.0200321			4.09353	0
	39.9119	0			2.00025	0			8.93134	0			4.09353	0
	39.9546	0			2.00239	0			8.9409	0			4.09791	0
	39.9546	0.00896539			2.00239	0.268336			8.9409	0.0200321			4.09791	0
	39.9973	0.00896539			2.00453	0.268336			8.95045	0.0200321			4.10229	0
	39.9973	0			2.00453	0			8.95045	0			4.10229	0
	40.04	0			2.00667	0			8.96	0			4.10667	0
	40.04	0.00896539			2.00667	0.268336			8.96	0.0200321			4.10667	0
	40.0827	0.00896539			2.00881	0.268336			8.96955	0.0200321			4.11104	0
	40.0827	0			2.00881	0			8.96955	0			4.11104	0
	40.1254	0			2.01095	0			8.9791	0			4.11542	0
	40.1254	0.00896539			2.01095	0.268336			8.9791	0.0200321			4.11542	0
	40.1681	0.00896539			2.01308	0.268336			8.98866	0.0200321			4.1198	0
	40.1681	0			2.01308	0			8.98866	0			4.1198	0
	40.2107	0			2.01522	0			8.99821	0			4.12418	0
	40.2107	0.00896539			2.01522	0.268336			8.99821	0.0200321			4.12418	0
	40.2534	0.00896539			2.01736	0.268336			9.00776	0.0200321			4.12856	0
	40.2534	0			2.01736	0			9.00776	0			4.12856	0
	40.2961	0			2.0195	0			9.01731	0			4.13294	0
	40.2961	0.00896539			2.0195	0.268336			9.01731	0.0200321			4.13294	0
	40.3388	0.00896539			2.02164	0.268336			9.02687	0.0200321			4.13731	0
	40.3388	0			2.02164	0			9.02687	0			4.13731	0
	40.3815	0			2.02378	0			9.03642	0			4.14169	0
	40.3815	0.00896539			2.02378	0.268336			9.03642	0.0200321			4.14169	0
	40.4242	0.00896539			2.02592	0.268336			9.04597	0.0200321			4.14607	0
	40.4242	0			2.02592	0			9.04597	0			4.14607	0
	40.4669	0			2.02806	0			9.05552	0			4.15045	0
	40.4669	0.00896539			2.02806	0.268336			9.05552	0.0200321			4.15045	0
	40.5096	0.00896539			2.0302	0.268336			9.06507	0.0200321			4.15483	0
	40.5096	0			2.0302	0			9.06507	0			4.15483	0
	40.5522	0			2.03234	0			9.07463	0			4.1592	0
	40.5522	0.00896539			2.03234	0.268336			9.07463	0.0200321			4.1592	0
	40.5949	0.00896539			2.03448	0.268336			9.08418	0.0200321			4.16358	0
	40.5949	0			2.03448	0			9.08418	0			4.16358	0
	40.6376	0			2.03662	0			9.09373	0			4.16796	0
	40.6376	0.00896539			2.03662	0.268336			9.09373	0.0200321			4.16796	0
	40.6803	0.00896539			2.03876	0.268336			9.10328	0.0200321			4.17234	0
	40.6803	0			2.03876	0			9.10328	0			4.17234	0
	40.723	0			2.0409	0			9.11284	0			4.17672	0
	40.723	0.00896539			2.0409	0.268336			9.11284	0.0200321			4.17672	0
	40.7657	0.00896539			2.04303	0.268336			9.12239	0.0200321			4.18109	0
	40.7657	0			2.04303	0			9.12239	0			4.18109	0
	40.8084	0			2.04517	0			9.13194	0			4.18547	0
	40.8084	0.00896539			2.04517	0.268336			9.13194	0.0200321			4.18547	0
	40.851	0.00896539			2.04731	0.268336			9.14149	0.0200321			4.18985	0
	40.851	0			2.04731	0			9.14149	0			4.18985	0
	40.8937	0			2.04945	0			9.15104	0			4.19423	0
	40.8937	0.00896539			2.04945	0.268336			9.15104	0.0200321			4.19423	0
	40.9364	0.00896539			2.05159	0.268336			9.1606	0.0200321			4.19861	0
	40.9364	0			2.05159	0			9.1606	0			4.19861	0
	40.9791	0			2.05373	0			9.17015	0			4.20299	0
	40.9791	0.00896539			2.05373	0.268336			9.17015	0.0200321			4.20299	0
	41.0218	0.00896539			2.05587	0.268336			9.1797	0.0200321			4.20736	0
	41.0218	0			2.05587	0			9.1797	0			4.20736	0
	41.0645	0			2.05801	0			9.18925	0			4.21174	0
	41.0645	0.00896539			2.05801	0.268336			9.18925	0.0200321			4.21174	0
	41.1072	0.00896539			2.06015	0.268336			9.19881	0.0200321			4.21612	0
	41.1072	0			2.06015	0			9.19881	0			4.21612	0
	41.1499	0			2.06229	0			9.20836	0			4.2205	0
	41.1499	0.00896539			2.06229	0.268336			9.20836	0.0200321			4.2205	0
	41.1925	0.00896539			2.06443	0.268336			9.21791	0.0200321			4.22488	0
	41.1925	0			2.06443	0			9.21791	0			4.22488	0
	41.2352	0			2.06657	0			9.22746	0			4.22925	0
	41.2352	0.00896539			2.06657	0.268336			9.22746	0.0200321			4.22925	0
	41.2779	0.00896539			2.06871	0.268336			9.23701	0.0200321			4.23363	0
	41.2779	0			2.06871	0			9.23701	0			4.23363	0
	41.3206	0			2.07085	0			9.24657	0			4.23801	0
	41.3206	0.00896539			2.07085	0.268336			9.24657	0.0200321			4.23801	0
	41.3633	0.00896539			2.07299	0.268336			9.25612	0.0200321			4.24239	0
	41.3633	0			2.07299	0			9.25612	0			4.24239	0
	41.406	0			2.07512	0			9.26567	0			4.24677	0
	41.406	0.00896539			2.07512	0.268336			9.26567	0.0200321			4.24677	0
	41.4487	0.00896539			2.07726	0.268336			9.27522	0.0200321			4.25114	0
	41.4487	0			2.07726	0			9.27522	0			4.25114	0
	41.4913	0			2.0794	0			9.28478	0			4.25552	0
	41.4913	0.00896539			2.0794	0.268336			9.28478	0.0200321			4.25552	0
	41.534	0.00896539			2.08154	0.268336			9.29433	0.0200321			4.2599	0
	41.534	0			2.08154	0			9.29433	0			4.2599	0
	41.5767	0			2.08368	0			9.30388	0			4.26428	0
	41.5767	0.00896539			2.08368	0.268336			9.30388	0.0200321			4.26428	0
	41.6194	0.00896539			2.08582	0.268336			9.31343	0.0200321			4.26866	0
	41.6194	0			2.08582	0			9.31343	0			4.26866	0
	41.6621	0			2.08796	0			9.32299	0			4.27303	0
	41.6621	0.00896539			2.08796	0.268336			9.32299	0.0200321			4.27303	0
	41.7048	0.00896539			2.0901	0.268336			9.33254	0.0200321			4.27741	0
	41.7048	0			2.0901	0			9.33254	0			4.27741	0
	41.7475	0			2.09224	0			9.34209	0			4.28179	0
	41.7475	0.00896539			2.09224	0.268336			9.34209	0.0200321			4.28179	0
	41.7901	0.00896539			2.09438	0.268336			9.35164	0.0200321			4.28617	0
	41.7901	0			2.09438	0			9.35164	0			4.28617	0
	41.8328	0			2.09652	0			9.36119	0			4.29055	0
	41.8328	0.00896539			2.09652	0.268336			9.36119	0.0200321			4.29055	0
	41.8755	0.00896539			2.09866	0.268336			9.37075	0.0200321			4.29493	0
	41.8755	0			2.09866	0			9.37075	0			4.29493	0
	41.9182	0			2.1008	0			9.3803	0			4.2993	0
	41.9182	0.00896539			2.1008	0.268336			9.3803	0.0200321			4.2993	0
	41.9609	0.00896539			2.10294	0.268336			9.38985	0.0200321			4.30368	0
	41.9609	0			2.10294	0			9.38985	0			4.30368	0
	42.0036	0			2.10507	0			9.3994	0			4.30806	0
	42.0036	0.00896539			2.10507	0.268336			9.3994	0.0200321			4.30806	0
	42.0463	0.00896539			2.10721	0.268336			9.40896	0.0200321			4.31244	0
	42.0463	0			2.10721	0			9.40896	0			4.31244	0
	42.089	0			2.10935	0			9.41851	0			4.31682	0
	42.089	0.00896539			2.10935	0.268336			9.41851	0.0200321			4.31682	0
	42.1316	0.00896539			2.11149	0.268336			9.42806	0.0200321			4.32119	0
	42.1316	0			2.11149	0			9.42806	0			4.32119	0
	42.1743	0			2.11363	0			9.43761	0			4.32557	0
	42.1743	0.00896539			2.11363	0.268336			9.43761	0.0200321			4.32557	0
	42.217	0.00896539			2.11577	0.268336			9.44716	0.0200321			4.32995	0
	42.217	0			2.11577	0			9.44716	0			4.32995	0
	42.2597	0			2.11791	0			9.45672	0			4.33433	0
	42.2597	0.00896539			2.11791	0.268336			9.45672	0.0200321			4.33433	0
	42.3024	0.00896539			2.12005	0.268336			9.46627	0.0200321			4.33871	0
	42.3024	0			2.12005	0			9.46627	0			4.33871	0
	42.3451	0			2.12219	0			9.47582	0			4.34308	0
	42.3451	0.00896539			2.12219	0.268336			9.47582	0.0200321			4.34308	0
	42.3878	0.00896539			2.12433	0.268336			9.48537	0.0200321			4.34746	0
	42.3878	0			2.12433	0			9.48537	0			4.34746	0
	42.4304	0			2.12647	0			9.49493	0			4.35184	0
	42.4304	0.00896539			2.12647	0.268336			9.49493	0.0200321			4.35184	0
	42.4731	0.00896539			2.12861	0.268336			9.50448	0.0200321			4.35622	0
	42.4731	0			2.12861	0			9.50448	0			4.35622	0
	42.5158	0			2.13075	0			9.51403	0			4.3606	0
	42.5158	0.00896539			2.13075	0.268336			9.51403	0.0200321			4.3606	0
	42.5585	0.00896539			2.13289	0.268336			9.52358	0.0200321			4.36498	0
	42.5585	0			2.13289	0			9.52358	0			4.36498	0
	42.6012	0			2.13502	0			9.53313	0			4.36935	0
	42.6012	0.00896539			2.13502	0.268336			9.53313	0.0200321			4.36935	0
	42.6439	0.00896539			2.13716	0.268336			9.54269	0.0200321			4.37373	0
	42.6439	0			2.13716	0			9.54269	0			4.37373	0
[truncated: 2,020 more rows]

## Sheet: XLSTAT_20240408_132428_1_HID
	0	0	0	0	0	0	0	0	0	0	0	0	0	0	0	0
	0	0.0403443	0	0.0403443	0	0.357782	0	0.357782	0	0.200321	0	0.200321	0	0.174825	0	0.174825
	0.0426866	0.0403443	17.16	0.0403443	0.0021393	0.357782	0.86	0.357782	0.00955224	0.200321	3.84	0.200321	0.00437811	0.174825	1.76	0.174825
	0.0426866	0	17.16	0	0.0021393	0	0.86	0	0.00955224	0	3.84	0	0.00437811	0	1.76	0
	0.0853731	0	17.16	0	0.00427861	0	0.86	0.0894454	0.0191045	0	3.84	0	0.00875622	0	1.76	0.305944
	0.0853731	0.0403443	34.32	0	0.00427861	0.357782	1.72	0.0894454	0.0191045	0.200321	7.68	0	0.00875622	0.174825	3.52	0.305944
	0.12806	0.0403443	34.32	0	0.00641791	0.357782	1.72	0	0.0286567	0.200321	7.68	0	0.0131343	0.174825	3.52	0
	0.12806	0	34.32	0.00896539	0.00641791	0	1.72	0.268336	0.0286567	0	7.68	0.0200321	0.0131343	0	3.52	0
	0.170746	0	51.48	0.00896539	0.00855721	0	2.58	0.268336	0.038209	0	11.52	0.0200321	0.0175124	0	5.28	0
	0.170746	0.0403443	51.48	0	0.00855721	0.357782	2.58	0	0.038209	0.200321	11.52	0	0.0175124	0.174825	5.28	0
	0.213433	0.0403443	51.48	0	0.0106965	0.357782	2.58	0.178891	0.0477612	0.200321	11.52	0.0200321	0.0218905	0.174825	5.28	0.0437063
	0.213433	0	68.64	0	0.0106965	0	3.44	0.178891	0.0477612	0	15.36	0.0200321	0.0218905	0	7.04	0.0437063
	0.256119	0	68.64	0	0.0128358	0	3.44	0	0.0573134	0	15.36	0	0.0262687	0	7.04	0
	0.256119	0.0403443	68.64	0.00896539	0.0128358	0.357782	3.44	0.268336	0.0573134	0.200321	15.36	0.0200321	0.0262687	0.174825	7.04	0.0437063
	0.298806	0.0403443	85.8	0.00896539	0.0149751	0.357782	4.3	0.268336	0.0668657	0.200321	19.2	0.0200321	0.0306468	0.174825	8.8	0.0437063
	0.298806	0	85.8	0	0.0149751	0	4.3	0	0.0668657	0	19.2	0	0.0306468	0	8.8	0
	0.341493	0			0.0171144	0			0.0764179	0			0.0350249	0
	0.341493	0.0403443			0.0171144	0.357782			0.0764179	0.200321			0.0350249	0.174825
	0.384179	0.0403443			0.0192537	0.357782			0.0859701	0.200321			0.039403	0.174825
	0.384179	0			0.0192537	0			0.0859701	0			0.039403	0
	0.426866	0			0.021393	0			0.0955224	0			0.0437811	0
	0.426866	0.0403443			0.021393	0.357782			0.0955224	0.200321			0.0437811	0.174825
	0.469552	0.0403443			0.0235323	0.357782			0.105075	0.200321			0.0481592	0.174825
	0.469552	0			0.0235323	0			0.105075	0			0.0481592	0
	0.512239	0			0.0256716	0			0.114627	0			0.0525373	0
	0.512239	0.0403443			0.0256716	0.357782			0.114627	0.200321			0.0525373	0.174825
	0.554925	0.0403443			0.0278109	0.357782			0.124179	0.200321			0.0569154	0.174825
	0.554925	0			0.0278109	0			0.124179	0			0.0569154	0
	0.597612	0			0.0299502	0			0.133731	0			0.0612935	0
	0.597612	0.0403443			0.0299502	0.357782			0.133731	0.200321			0.0612935	0.174825
	0.640299	0.0403443			0.0320896	0.357782			0.143284	0.200321			0.0656716	0.174825
	0.640299	0			0.0320896	0			0.143284	0			0.0656716	0
	0.682985	0			0.0342289	0			0.152836	0			0.0700498	0
	0.682985	0.0403443			0.0342289	0.357782			0.152836	0.200321			0.0700498	0.174825
	0.725672	0.0403443			0.0363682	0.357782			0.162388	0.200321			0.0744279	0.174825
	0.725672	0			0.0363682	0			0.162388	0			0.0744279	0
	0.768358	0			0.0385075	0			0.17194	0			0.078806	0
	0.768358	0.0403443			0.0385075	0.357782			0.17194	0.200321			0.078806	0.174825
	0.811045	0.0403443			0.0406468	0.357782			0.181493	0.200321			0.0831841	0.174825
	0.811045	0			0.0406468	0			0.181493	0			0.0831841	0
	0.853731	0			0.0427861	0			0.191045	0			0.0875622	0
	0.853731	0.0403443			0.0427861	0.357782			0.191045	0.200321			0.0875622	0.174825
	0.896418	0.0403443			0.0449254	0.357782			0.200597	0.200321			0.0919403	0.174825
	0.896418	0			0.0449254	0			0.200597	0			0.0919403	0
	0.939104	0			0.0470647	0			0.210149	0			0.0963184	0
	0.939104	0.0403443			0.0470647	0.357782			0.210149	0.200321			0.0963184	0.174825
	0.981791	0.0403443			0.049204	0.357782			0.219701	0.200321			0.100697	0.174825
	0.981791	0			0.049204	0			0.219701	0			0.100697	0
	1.02448	0			0.0513433	0			0.229254	0			0.105075	0
	1.02448	0.0403443			0.0513433	0.357782			0.229254	0.200321			0.105075	0.174825
	1.06716	0.0403443			0.0534826	0.357782			0.238806	0.200321			0.109453	0.174825
	1.06716	0			0.0534826	0			0.238806	0			0.109453	0
	1.10985	0			0.0556219	0			0.248358	0			0.113831	0
	1.10985	0.0403443			0.0556219	0.357782			0.248358	0.200321			0.113831	0.174825
	1.15254	0.0403443			0.0577612	0.357782			0.25791	0.200321			0.118209	0.174825
	1.15254	0			0.0577612	0			0.25791	0			0.118209	0
	1.19522	0			0.0599005	0			0.267463	0			0.122587	0
	1.19522	0.0403443			0.0599005	0.357782			0.267463	0.200321			0.122587	0.174825
	1.23791	0.0403443			0.0620398	0.357782			0.277015	0.200321			0.126965	0.174825
	1.23791	0			0.0620398	0			0.277015	0			0.126965	0
	1.2806	0			0.0641791	0			0.286567	0			0.131343	0
	1.2806	0.0403443			0.0641791	0.357782			0.286567	0.200321			0.131343	0.174825
	1.32328	0.0403443			0.0663184	0.357782			0.296119	0.200321			0.135721	0.174825
	1.32328	0			0.0663184	0			0.296119	0			0.135721	0
	1.36597	0			0.0684577	0			0.305672	0			0.1401	0
	1.36597	0.0403443			0.0684577	0.357782			0.305672	0.200321			0.1401	0.174825
	1.40866	0.0403443			0.070597	0.357782			0.315224	0.200321			0.144478	0.174825
	1.40866	0			0.070597	0			0.315224	0			0.144478	0
	1.45134	0			0.0727363	0			0.324776	0			0.148856	0
	1.45134	0.0403443			0.0727363	0.357782			0.324776	0.200321			0.148856	0.174825
	1.49403	0.0403443			0.0748756	0.357782			0.334328	0.200321			0.153234	0.174825
	1.49403	0			0.0748756	0			0.334328	0			0.153234	0
	1.53672	0			0.0770149	0			0.343881	0			0.157612	0
	1.53672	0.0403443			0.0770149	0.357782			0.343881	0.200321			0.157612	0.174825
	1.5794	0.0403443			0.0791542	0.357782			0.353433	0.200321			0.16199	0.174825
	1.5794	0			0.0791542	0			0.353433	0			0.16199	0
	1.62209	0			0.0812935	0			0.362985	0			0.166368	0
	1.62209	0.0403443			0.0812935	0.357782			0.362985	0.200321			0.166368	0.174825
	1.66478	0.0403443			0.0834328	0.357782			0.372537	0.200321			0.170746	0.174825
	1.66478	0			0.0834328	0			0.372537	0			0.170746	0
	1.70746	0			0.0855721	0			0.38209	0			0.175124	0
	1.70746	0.0403443			0.0855721	0.357782			0.38209	0.200321			0.175124	0.174825
	1.75015	0.0403443			0.0877114	0.357782			0.391642	0.200321			0.179502	0.174825
	1.75015	0			0.0877114	0			0.391642	0			0.179502	0
	1.79284	0			0.0898507	0			0.401194	0			0.183881	0
	1.79284	0.0403443			0.0898507	0.357782			0.401194	0.200321			0.183881	0.174825
	1.83552	0.0403443			0.09199	0.357782			0.410746	0.200321			0.188259	0.174825
	1.83552	0			0.09199	0			0.410746	0			0.188259	0
	1.87821	0			0.0941294	0			0.420299	0			0.192637	0
	1.87821	0.0403443			0.0941294	0.357782			0.420299	0.200321			0.192637	0.174825
	1.9209	0.0403443			0.0962687	0.357782			0.429851	0.200321			0.197015	0.174825
	1.9209	0			0.0962687	0			0.429851	0			0.197015	0
	1.96358	0			0.098408	0			0.439403	0			0.201393	0
	1.96358	0.0403443			0.098408	0.357782			0.439403	0.200321			0.201393	0.174825
	2.00627	0.0403443			0.100547	0.357782			0.448955	0.200321			0.205771	0.174825
	2.00627	0			0.100547	0			0.448955	0			0.205771	0
	2.04896	0			0.102687	0			0.458507	0			0.210149	0
	2.04896	0.0403443			0.102687	0.357782			0.458507	0.200321			0.210149	0.174825
	2.09164	0.0403443			0.104826	0.357782			0.46806	0.200321			0.214527	0.174825
	2.09164	0			0.104826	0			0.46806	0			0.214527	0
	2.13433	0			0.106965	0			0.477612	0			0.218905	0
	2.13433	0.0403443			0.106965	0.357782			0.477612	0.200321			0.218905	0.174825
	2.17701	0.0403443			0.109104	0.357782			0.487164	0.200321			0.223284	0.174825
	2.17701	0			0.109104	0			0.487164	0			0.223284	0
	2.2197	0			0.111244	0			0.496716	0			0.227662	0
	2.2197	0.0403443			0.111244	0.357782			0.496716	0.200321			0.227662	0.174825
	2.26239	0.0403443			0.113383	0.357782			0.506269	0.200321			0.23204	0.174825
	2.26239	0			0.113383	0			0.506269	0			0.23204	0
	2.30507	0			0.115522	0			0.515821	0			0.236418	0
	2.30507	0.0403443			0.115522	0.357782			0.515821	0.200321			0.236418	0.174825
	2.34776	0.0403443			0.117662	0.357782			0.525373	0.200321			0.240796	0.174825
	2.34776	0			0.117662	0			0.525373	0			0.240796	0
	2.39045	0			0.119801	0			0.534925	0			0.245174	0
	2.39045	0.0403443			0.119801	0.357782			0.534925	0.200321			0.245174	0.174825
	2.43313	0.0403443			0.12194	0.357782			0.544478	0.200321			0.249552	0.174825
	2.43313	0			0.12194	0			0.544478	0			0.249552	0
	2.47582	0			0.12408	0			0.55403	0			0.25393	0
	2.47582	0.0403443			0.12408	0.357782			0.55403	0.200321			0.25393	0.174825
	2.51851	0.0403443			0.126219	0.357782			0.563582	0.200321			0.258308	0.174825
	2.51851	0			0.126219	0			0.563582	0			0.258308	0
	2.56119	0			0.128358	0			0.573134	0			0.262687	0
	2.56119	0.0403443			0.128358	0.357782			0.573134	0.200321			0.262687	0.174825
	2.60388	0.0403443			0.130498	0.357782			0.582687	0.200321			0.267065	0.174825
	2.60388	0			0.130498	0			0.582687	0			0.267065	0
	2.64657	0			0.132637	0			0.592239	0			0.271443	0
	2.64657	0.0403443			0.132637	0.357782			0.592239	0.200321			0.271443	0.174825
	2.68925	0.0403443			0.134776	0.357782			0.601791	0.200321			0.275821	0.174825
	2.68925	0			0.134776	0			0.601791	0			0.275821	0
	2.73194	0			0.136915	0			0.611343	0			0.280199	0
	2.73194	0.0403443			0.136915	0.357782			0.611343	0.200321			0.280199	0.174825
	2.77463	0.0403443			0.139055	0.357782			0.620896	0.200321			0.284577	0.174825
	2.77463	0			0.139055	0			0.620896	0			0.284577	0
	2.81731	0			0.141194	0			0.630448	0			0.288955	0
	2.81731	0.0403443			0.141194	0.357782			0.630448	0.200321			0.288955	0.174825
	2.86	0.0403443			0.143333	0.357782			0.64	0.200321			0.293333	0.174825
	2.86	0			0.143333	0			0.64	0			0.293333	0
	2.90269	0			0.145473	0			0.649552	0			0.297711	0
	2.90269	0.0403443			0.145473	0.357782			0.649552	0.200321			0.297711	0.174825
	2.94537	0.0403443			0.147612	0.357782			0.659104	0.200321			0.30209	0.174825
	2.94537	0			0.147612	0			0.659104	0			0.30209	0
	2.98806	0			0.149751	0			0.668657	0			0.306468	0
	2.98806	0.0403443			0.149751	0.357782			0.668657	0.200321			0.306468	0.174825
	3.03075	0.0403443			0.151891	0.357782			0.678209	0.200321			0.310846	0.174825
	3.03075	0			0.151891	0			0.678209	0			0.310846	0
	3.07343	0			0.15403	0			0.687761	0			0.315224	0
	3.07343	0.0403443			0.15403	0.357782			0.687761	0.200321			0.315224	0.174825
	3.11612	0.0403443			0.156169	0.357782			0.697313	0.200321			0.319602	0.174825
	3.11612	0			0.156169	0			0.697313	0			0.319602	0
	3.15881	0			0.158308	0			0.706866	0			0.32398	0
	3.15881	0.0403443			0.158308	0.357782			0.706866	0.200321			0.32398	0.174825
	3.20149	0.0403443			0.160448	0.357782			0.716418	0.200321			0.328358	0.174825
	3.20149	0			0.160448	0			0.716418	0			0.328358	0
	3.24418	0			0.162587	0			0.72597	0			0.332736	0
	3.24418	0.0403443			0.162587	0.357782			0.72597	0.200321			0.332736	0.174825
	3.28687	0.0403443			0.164726	0.357782			0.735522	0.200321			0.337114	0.174825
	3.28687	0			0.164726	0			0.735522	0			0.337114	0
	3.32955	0			0.166866	0			0.745075	0			0.341493	0
	3.32955	0.0403443			0.166866	0.357782			0.745075	0.200321			0.341493	0.174825
	3.37224	0.0403443			0.169005	0.357782			0.754627	0.200321			0.345871	0.174825
	3.37224	0			0.169005	0			0.754627	0			0.345871	0
	3.41493	0			0.171144	0			0.764179	0			0.350249	0
	3.41493	0.0403443			0.171144	0.357782			0.764179	0.200321			0.350249	0.174825
	3.45761	0.0403443			0.173284	0.357782			0.773731	0.200321			0.354627	0.174825
	3.45761	0			0.173284	0			0.773731	0			0.354627	0
	3.5003	0			0.175423	0			0.783284	0			0.359005	0
	3.5003	0.0403443			0.175423	0.357782			0.783284	0.200321			0.359005	0.174825
	3.54299	0.0403443			0.177562	0.357782			0.792836	0.200321			0.363383	0.174825
	3.54299	0			0.177562	0			0.792836	0			0.363383	0
	3.58567	0			0.179701	0			0.802388	0			0.367761	0
	3.58567	0.0403443			0.179701	0.357782			0.802388	0.200321			0.367761	0.174825
	3.62836	0.0403443			0.181841	0.357782			0.81194	0.200321			0.372139	0.174825
	3.62836	0			0.181841	0			0.81194	0			0.372139	0
	3.67104	0			0.18398	0			0.821493	0			0.376517	0
	3.67104	0.0403443			0.18398	0.357782			0.821493	0.200321			0.376517	0.174825
	3.71373	0.0403443			0.186119	0.357782			0.831045	0.200321			0.380896	0.174825
	3.71373	0			0.186119	0			0.831045	0			0.380896	0
	3.75642	0			0.188259	0			0.840597	0			0.385274	0
	3.75642	0.0403443			0.188259	0.357782			0.840597	0.200321			0.385274	0.174825
	3.7991	0.0403443			0.190398	0.357782			0.850149	0.200321			0.389652	0.174825
	3.7991	0			0.190398	0			0.850149	0			0.389652	0
	3.84179	0			0.192537	0			0.859701	0			0.39403	0
	3.84179	0.0403443			0.192537	0.357782			0.859701	0.200321			0.39403	0.174825
	3.88448	0.0403443			0.194677	0.357782			0.869254	0.200321			0.398408	0.174825
	3.88448	0			0.194677	0			0.869254	0			0.398408	0
	3.92716	0			0.196816	0			0.878806	0			0.402786	0
	3.92716	0.0403443			0.196816	0.357782			0.878806	0.200321			0.402786	0.174825
	3.96985	0.0403443			0.198955	0.357782			0.888358	0.200321			0.407164	0.174825
	3.96985	0			0.198955	0			0.888358	0			0.407164	0
	4.01254	0			0.201095	0			0.89791	0			0.411542	0
	4.01254	0.0403443			0.201095	0.357782			0.89791	0.200321			0.411542	0.174825
	4.05522	0.0403443			0.203234	0.357782			0.907463	0.200321			0.41592	0.174825
	4.05522	0			0.203234	0			0.907463	0			0.41592	0
	4.09791	0			0.205373	0			0.917015	0			0.420299	0
	4.09791	0.0403443			0.205373	0.357782			0.917015	0.200321			0.420299	0.174825
	4.1406	0.0403443			0.207512	0.357782			0.926567	0.200321			0.424677	0.174825
	4.1406	0			0.207512	0			0.926567	0			0.424677	0
	4.18328	0			0.209652	0			0.936119	0			0.429055	0
	4.18328	0.0403443			0.209652	0.357782			0.936119	0.200321			0.429055	0.174825
	4.22597	0.0403443			0.211791	0.357782			0.945672	0.200321			0.433433	0.174825
	4.22597	0			0.211791	0			0.945672	0			0.433433	0
	4.26866	0			0.21393	0			0.955224	0			0.437811	0
	4.26866	0.0403443			0.21393	0.357782			0.955224	0.200321			0.437811	0.174825
	4.31134	0.0403443			0.21607	0.357782			0.964776	0.200321			0.442189	0.174825
	4.31134	0			0.21607	0			0.964776	0			0.442189	0
	4.35403	0			0.218209	0			0.974328	0			0.446567	0
	4.35403	0.0403443			0.218209	0.357782			0.974328	0.200321			0.446567	0.174825
	4.39672	0.0403443			0.220348	0.357782			0.983881	0.200321			0.450945	0.174825
	4.39672	0			0.220348	0			0.983881	0			0.450945	0
	4.4394	0			0.222488	0			0.993433	0			0.455323	0
	4.4394	0.0403443			0.222488	0.357782			0.993433	0.200321			0.455323	0.174825
	4.48209	0.0403443			0.224627	0.357782			1.00299	0.200321			0.459701	0.174825
	4.48209	0			0.224627	0			1.00299	0			0.459701	0
	4.52478	0			0.226766	0			1.01254	0			0.46408	0
	4.52478	0.0403443			0.226766	0.357782			1.01254	0.200321			0.46408	0.174825
	4.56746	0.0403443			0.228905	0.357782			1.02209	0.200321			0.468458	0.174825
	4.56746	0			0.228905	0			1.02209	0			0.468458	0
	4.61015	0			0.231045	0			1.03164	0			0.472836	0
	4.61015	0.0403443			0.231045	0.357782			1.03164	0.200321			0.472836	0.174825
	4.65284	0.0403443			0.233184	0.357782			1.04119	0.200321			0.477214	0.174825
	4.65284	0			0.233184	0			1.04119	0			0.477214	0
	4.69552	0			0.235323	0			1.05075	0			0.481592	0
	4.69552	0.0403443			0.235323	0.357782			1.05075	0.200321			0.481592	0.174825
	4.73821	0.0403443			0.237463	0.357782			1.0603	0.200321			0.48597	0.174825
	4.73821	0			0.237463	0			1.0603	0			0.48597	0
	4.7809	0			0.239602	0			1.06985	0			0.490348	0
	4.7809	0.0403443			0.239602	0.357782			1.06985	0.200321			0.490348	0.174825
	4.82358	0.0403443			0.241741	0.357782			1.0794	0.200321			0.494726	0.174825
	4.82358	0			0.241741	0			1.0794	0			0.494726	0
	4.86627	0			0.243881	0			1.08896	0			0.499104	0
	4.86627	0.0403443			0.243881	0.357782			1.08896	0.200321			0.499104	0.174825
	4.90896	0.0403443			0.24602	0.357782			1.09851	0.200321			0.503483	0.174825
	4.90896	0			0.24602	0			1.09851	0			0.503483	0
	4.95164	0			0.248159	0			1.10806	0			0.507861	0
	4.95164	0.0403443			0.248159	0.357782			1.10806	0.200321			0.507861	0.174825
	4.99433	0.0403443			0.250299	0.357782			1.11761	0.200321			0.512239	0.174825
	4.99433	0			0.250299	0			1.11761	0			0.512239	0
	5.03701	0			0.252438	0			1.12716	0			0.516617	0
	5.03701	0.0403443			0.252438	0.357782			1.12716	0.200321			0.516617	0.174825
	5.0797	0.0403443			0.254577	0.357782			1.13672	0.200321			0.520995	0.174825
	5.0797	0			0.254577	0			1.13672	0			0.520995	0
	5.12239	0			0.256716	0			1.14627	0			0.525373	0
	5.12239	0.0403443			0.256716	0.357782			1.14627	0.200321			0.525373	0.174825
	5.16507	0.0403443			0.258856	0.357782			1.15582	0.200321			0.529751	0.174825
	5.16507	0			0.258856	0			1.15582	0			0.529751	0
	5.20776	0			0.260995	0			1.16537	0			0.534129	0
	5.20776	0.0403443			0.260995	0.357782			1.16537	0.200321			0.534129	0.174825
	5.25045	0.0403443			0.263134	0.357782			1.17493	0.200321			0.538507	0.174825
	5.25045	0			0.263134	0			1.17493	0			0.538507	0
	5.29313	0			0.265274	0			1.18448	0			0.542886	0
	5.29313	0.0403443			0.265274	0.357782			1.18448	0.200321			0.542886	0.174825
	5.33582	0.0403443			0.267413	0.357782			1.19403	0.200321			0.547264	0.174825
	5.33582	0			0.267413	0			1.19403	0			0.547264	0
	5.37851	0			0.269552	0			1.20358	0			0.551642	0
	5.37851	0.0403443			0.269552	0.357782			1.20358	0.200321			0.551642	0.174825
	5.42119	0.0403443			0.271692	0.357782			1.21313	0.200321			0.55602	0.174825
	5.42119	0			0.271692	0			1.21313	0			0.55602	0
	5.46388	0			0.273831	0			1.22269	0			0.560398	0
	5.46388	0.0403443			0.273831	0.357782			1.22269	0.200321			0.560398	0.174825
	5.50657	0.0403443			0.27597	0.357782			1.23224	0.200321			0.564776	0.174825
	5.50657	0			0.27597	0			1.23224	0			0.564776	0
	5.54925	0			0.278109	0			1.24179	0			0.569154	0
	5.54925	0.0403443			0.278109	0.357782			1.24179	0.200321			0.569154	0.174825
	5.59194	0.0403443			0.280249	0.357782			1.25134	0.200321			0.573532	0.174825
	5.59194	0			0.280249	0			1.25134	0			0.573532	0
	5.63463	0			0.282388	0			1.2609	0			0.57791	0
	5.63463	0.0403443			0.282388	0.357782			1.2609	0.200321			0.57791	0.174825
	5.67731	0.0403443			0.284527	0.357782			1.27045	0.200321			0.582289	0.174825
	5.67731	0			0.284527	0			1.27045	0			0.582289	0
	5.72	0			0.286667	0			1.28	0			0.586667	0
	5.72	0.0403443			0.286667	0.357782			1.28	0.200321			0.586667	0.174825
	5.76269	0.0403443			0.288806	0.357782			1.28955	0.200321			0.591045	0.174825
	5.76269	0			0.288806	0			1.28955	0			0.591045	0
	5.80537	0			0.290945	0			1.2991	0			0.595423	0
	5.80537	0.0403443			0.290945	0.357782			1.2991	0.200321			0.595423	0.174825
	5.84806	0.0403443			0.293085	0.357782			1.30866	0.200321			0.599801	0.174825
	5.84806	0			0.293085	0			1.30866	0			0.599801	0
	5.89075	0			0.295224	0			1.31821	0			0.604179	0
	5.89075	0.0403443			0.295224	0.357782			1.31821	0.200321			0.604179	0.174825
	5.93343	0.0403443			0.297363	0.357782			1.32776	0.200321			0.608557	0.174825
	5.93343	0			0.297363	0			1.32776	0			0.608557	0
	5.97612	0			0.299502	0			1.33731	0			0.612935	0
	5.97612	0.0403443			0.299502	0.357782			1.33731	0.200321			0.612935	0.174825
	6.01881	0.0403443			0.301642	0.357782			1.34687	0.200321			0.617313	0.174825
	6.01881	0			0.301642	0			1.34687	0			0.617313	0
	6.06149	0			0.303781	0			1.35642	0			0.621692	0
	6.06149	0.0403443			0.303781	0.357782			1.35642	0.200321			0.621692	0.174825
	6.10418	0.0403443			0.30592	0.357782			1.36597	0.200321			0.62607	0.174825
	6.10418	0			0.30592	0			1.36597	0			0.62607	0
	6.14687	0			0.30806	0			1.37552	0			0.630448	0
	6.14687	0.0403443			0.30806	0.357782			1.37552	0.200321			0.630448	0.174825
	6.18955	0.0403443			0.310199	0.357782			1.38507	0.200321			0.634826	0.174825
	6.18955	0			0.310199	0			1.38507	0			0.634826	0
	6.23224	0			0.312338	0			1.39463	0			0.639204	0
	6.23224	0.0403443			0.312338	0.357782			1.39463	0.200321			0.639204	0.174825
	6.27493	0.0403443			0.314478	0.357782			1.40418	0.200321			0.643582	0.174825
	6.27493	0			0.314478	0			1.40418	0			0.643582	0
	6.31761	0			0.316617	0			1.41373	0			0.64796	0
	6.31761	0.0403443			0.316617	0.357782			1.41373	0.200321			0.64796	0.174825
	6.3603	0.0403443			0.318756	0.357782			1.42328	0.200321			0.652338	0.174825
	6.3603	0			0.318756	0			1.42328	0			0.652338	0
	6.40299	0			0.320896	0			1.43284	0			0.656716	0
	6.40299	0.0403443			0.320896	0.357782			1.43284	0.200321			0.656716	0.174825
	6.44567	0.0403443			0.323035	0.357782			1.44239	0.200321			0.661095	0.174825
	6.44567	0			0.323035	0			1.44239	0			0.661095	0
	6.48836	0			0.325174	0			1.45194	0			0.665473	0
	6.48836	0.0403443			0.325174	0.357782			1.45194	0.200321			0.665473	0.174825
	6.53104	0.0403443			0.327313	0.357782			1.46149	0.200321			0.669851	0.174825
	6.53104	0			0.327313	0			1.46149	0			0.669851	0
	6.57373	0			0.329453	0			1.47104	0			0.674229	0
	6.57373	0.0403443			0.329453	0.357782			1.47104	0.200321			0.674229	0.174825
	6.61642	0.0403443			0.331592	0.357782			1.4806	0.200321			0.678607	0.174825
	6.61642	0			0.331592	0			1.4806	0			0.678607	0
	6.6591	0			0.333731	0			1.49015	0			0.682985	0
	6.6591	0.0403443			0.333731	0.357782			1.49015	0.200321			0.682985	0.174825
	6.70179	0.0403443			0.335871	0.357782			1.4997	0.200321			0.687363	0.174825
	6.70179	0			0.335871	0			1.4997	0			0.687363	0
	6.74448	0			0.33801	0			1.50925	0			0.691741	0
	6.74448	0.0403443			0.33801	0.357782			1.50925	0.200321			0.691741	0.174825
	6.78716	0.0403443			0.340149	0.357782			1.51881	0.200321			0.696119	0.174825
	6.78716	0			0.340149	0			1.51881	0			0.696119	0
	6.82985	0			0.342289	0			1.52836	0			0.700498	0
	6.82985	0.0403443			0.342289	0.357782			1.52836	0.200321			0.700498	0.174825
	6.87254	0.0403443			0.344428	0.357782			1.53791	0.200321			0.704876	0.174825
	6.87254	0			0.344428	0			1.53791	0			0.704876	0
	6.91522	0			0.346567	0			1.54746	0			0.709254	0
	6.91522	0.0403443			0.346567	0.357782			1.54746	0.200321			0.709254	0.174825
	6.95791	0.0403443			0.348706	0.357782			1.55701	0.200321			0.713632	0.174825
	6.95791	0			0.348706	0			1.55701	0			0.713632	0
	7.0006	0			0.350846	0			1.56657	0			0.71801	0
	7.0006	0.0403443			0.350846	0.357782			1.56657	0.200321			0.71801	0.174825
	7.04328	0.0403443			0.352985	0.357782			1.57612	0.200321			0.722388	0.174825
	7.04328	0			0.352985	0			1.57612	0			0.722388	0
	7.08597	0			0.355124	0			1.58567	0			0.726766	0
	7.08597	0.0403443			0.355124	0.357782			1.58567	0.200321			0.726766	0.174825
	7.12866	0.0403443			0.357264	0.357782			1.59522	0.200321			0.731144	0.174825
	7.12866	0			0.357264	0			1.59522	0			0.731144	0
	7.17134	0			0.359403	0			1.60478	0			0.735522	0
	7.17134	0.0403443			0.359403	0.357782			1.60478	0.200321			0.735522	0.174825
	7.21403	0.0403443			0.361542	0.357782			1.61433	0.200321			0.7399	0.174825
	7.21403	0			0.361542	0			1.61433	0			0.7399	0
	7.25672	0			0.363682	0			1.62388	0			0.744279	0
	7.25672	0.0403443			0.363682	0.357782			1.62388	0.200321			0.744279	0.174825
	7.2994	0.0403443			0.365821	0.357782			1.63343	0.200321			0.748657	0.174825
	7.2994	0			0.365821	0			1.63343	0			0.748657	0
	7.34209	0			0.36796	0			1.64299	0			0.753035	0
	7.34209	0.0403443			0.36796	0.357782			1.64299	0.200321			0.753035	0.174825
	7.38478	0.0403443			0.3701	0.357782			1.65254	0.200321			0.757413	0.174825
	7.38478	0			0.3701	0			1.65254	0			0.757413	0
	7.42746	0			0.372239	0			1.66209	0			0.761791	0
	7.42746	0.0403443			0.372239	0.357782			1.66209	0.200321			0.761791	0.174825
	7.47015	0.0403443			0.374378	0.357782			1.67164	0.200321			0.766169	0.174825
	7.47015	0			0.374378	0			1.67164	0			0.766169	0
	7.51284	0			0.376517	0			1.68119	0			0.770547	0
	7.51284	0.0403443			0.376517	0.357782			1.68119	0.200321			0.770547	0.174825
	7.55552	0.0403443			0.378657	0.357782			1.69075	0.200321			0.774925	0.174825
	7.55552	0			0.378657	0			1.69075	0			0.774925	0
	7.59821	0			0.380796	0			1.7003	0			0.779303	0
	7.59821	0.0403443			0.380796	0.357782			1.7003	0.200321			0.779303	0.174825
	7.6409	0.0403443			0.382935	0.357782			1.70985	0.200321			0.783682	0.174825
	7.6409	0			0.382935	0			1.70985	0			0.783682	0
	7.68358	0			0.385075	0			1.7194	0			0.78806	0
	7.68358	0.0403443			0.385075	0.357782			1.7194	0.200321			0.78806	0.174825
	7.72627	0.0403443			0.387214	0.357782			1.72896	0.200321			0.792438	0.174825
	7.72627	0			0.387214	0			1.72896	0			0.792438	0
	7.76896	0			0.389353	0			1.73851	0			0.796816	0
	7.76896	0.0403443			0.389353	0.357782			1.73851	0.200321			0.796816	0.174825
	7.81164	0.0403443			0.391493	0.357782			1.74806	0.200321			0.801194	0.174825
	7.81164	0			0.391493	0			1.74806	0			0.801194	0
	7.85433	0			0.393632	0			1.75761	0			0.805572	0
	7.85433	0.0403443			0.393632	0.357782			1.75761	0.200321			0.805572	0.174825
	7.89701	0.0403443			0.395771	0.357782			1.76716	0.200321			0.80995	0.174825
	7.89701	0			0.395771	0			1.76716	0			0.80995	0
	7.9397	0			0.39791	0			1.77672	0			0.814328	0
	7.9397	0.0403443			0.39791	0.357782			1.77672	0.200321			0.814328	0.174825
	7.98239	0.0403443			0.40005	0.357782			1.78627	0.200321			0.818706	0.174825
	7.98239	0			0.40005	0			1.78627	0			0.818706	0
	8.02507	0			0.402189	0			1.79582	0			0.823085	0
	8.02507	0.0403443			0.402189	0.357782			1.79582	0.200321			0.823085	0.174825
	8.06776	0.0403443			0.404328	0.357782			1.80537	0.200321			0.827463	0.174825
	8.06776	0			0.404328	0			1.80537	0			0.827463	0
	8.11045	0			0.406468	0			1.81493	0			0.831841	0
	8.11045	0.0403443			0.406468	0.357782			1.81493	0.200321			0.831841	0.174825
	8.15313	0.0403443			0.408607	0.357782			1.82448	0.200321			0.836219	0.174825
	8.15313	0			0.408607	0			1.82448	0			0.836219	0
	8.19582	0			0.410746	0			1.83403	0			0.840597	0
	8.19582	0.0403443			0.410746	0.357782			1.83403	0.200321			0.840597	0.174825
	8.23851	0.0403443			0.412886	0.357782			1.84358	0.200321			0.844975	0.174825
	8.23851	0			0.412886	0			1.84358	0			0.844975	0
	8.28119	0			0.415025	0			1.85313	0			0.849353	0
	8.28119	0.0403443			0.415025	0.357782			1.85313	0.200321			0.849353	0.174825
	8.32388	0.0403443			0.417164	0.357782			1.86269	0.200321			0.853731	0.174825
	8.32388	0			0.417164	0			1.86269	0			0.853731	0
	8.36657	0			0.419303	0			1.87224	0			0.858109	0
	8.36657	0.0403443			0.419303	0.357782			1.87224	0.200321			0.858109	0.174825
	8.40925	0.0403443			0.421443	0.357782			1.88179	0.200321			0.862488	0.174825
	8.40925	0			0.421443	0			1.88179	0			0.862488	0
	8.45194	0			0.423582	0			1.89134	0			0.866866	0
	8.45194	0.0403443			0.423582	0.357782			1.89134	0.200321			0.866866	0.174825
	8.49463	0.0403443			0.425721	0.357782			1.9009	0.200321			0.871244	0.174825
	8.49463	0			0.425721	0			1.9009	0			0.871244	0
	8.53731	0			0.427861	0			1.91045	0			0.875622	0
	8.53731	0.0403443			0.427861	0.357782			1.91045	0.200321			0.875622	0.174825
	8.58	0.0403443			0.43	0.357782			1.92	0.200321			0.88	0.174825
	8.58	0			0.43	0			1.92	0			0.88	0
	8.62269	0			0.432139	0			1.92955	0			0.884378	0
	8.62269	0.0403443			0.432139	0.357782			1.92955	0.200321			0.884378	0.174825
	8.66537	0.0403443			0.434279	0.357782			1.9391	0.200321			0.888756	0.174825
	8.66537	0			0.434279	0			1.9391	0			0.888756	0
	8.70806	0			0.436418	0			1.94866	0			0.893134	0
	8.70806	0.0403443			0.436418	0.357782			1.94866	0.200321			0.893134	0.174825
	8.75075	0.0403443			0.438557	0.357782			1.95821	0.200321			0.897512	0.174825
	8.75075	0			0.438557	0			1.95821	0			0.897512	0
	8.79343	0			0.440697	0			1.96776	0			0.901891	0
	8.79343	0.0403443			0.440697	0.357782			1.96776	0.200321			0.901891	0.174825
	8.83612	0.0403443			0.442836	0.357782			1.97731	0.200321			0.906269	0.174825
	8.83612	0			0.442836	0			1.97731	0			0.906269	0
	8.87881	0			0.444975	0			1.98687	0			0.910647	0
	8.87881	0.0403443			0.444975	0.357782			1.98687	0.200321			0.910647	0.174825
	8.92149	0.0403443			0.447114	0.357782			1.99642	0.200321			0.915025	0.174825
	8.92149	0			0.447114	0			1.99642	0			0.915025	0
	8.96418	0			0.449254	0			2.00597	0			0.919403	0
	8.96418	0.0403443			0.449254	0.357782			2.00597	0.200321			0.919403	0.174825
	9.00687	0.0403443			0.451393	0.357782			2.01552	0.200321			0.923781	0.174825
	9.00687	0			0.451393	0			2.01552	0			0.923781	0
	9.04955	0			0.453532	0			2.02507	0			0.928159	0
	9.04955	0.0403443			0.453532	0.357782			2.02507	0.200321			0.928159	0.174825
	9.09224	0.0403443			0.455672	0.357782			2.03463	0.200321			0.932537	0.174825
	9.09224	0			0.455672	0			2.03463	0			0.932537	0
	9.13493	0			0.457811	0			2.04418	0			0.936915	0
	9.13493	0.0403443			0.457811	0.357782			2.04418	0.200321			0.936915	0.174825
	9.17761	0.0403443			0.45995	0.357782			2.05373	0.200321			0.941294	0.174825
	9.17761	0			0.45995	0			2.05373	0			0.941294	0
	9.2203	0			0.46209	0			2.06328	0			0.945672	0
	9.2203	0.0403443			0.46209	0.357782			2.06328	0.200321			0.945672	0.174825
	9.26299	0.0403443			0.464229	0.357782			2.07284	0.200321			0.95005	0.174825
	9.26299	0			0.464229	0			2.07284	0			0.95005	0
	9.30567	0			0.466368	0			2.08239	0			0.954428	0
	9.30567	0.0403443			0.466368	0.357782			2.08239	0.200321			0.954428	0.174825
	9.34836	0.0403443			0.468507	0.357782			2.09194	0.200321			0.958806	0.174825
	9.34836	0			0.468507	0			2.09194	0			0.958806	0
	9.39104	0			0.470647	0			2.10149	0			0.963184	0
	9.39104	0.0403443			0.470647	0.357782			2.10149	0.200321			0.963184	0.174825
	9.43373	0.0403443			0.472786	0.357782			2.11104	0.200321			0.967562	0.174825
	9.43373	0			0.472786	0			2.11104	0			0.967562	0
	9.47642	0			0.474925	0			2.1206	0			0.97194	0
	9.47642	0.0403443			0.474925	0.357782			2.1206	0.200321			0.97194	0.174825
	9.5191	0.0403443			0.477065	0.357782			2.13015	0.200321			0.976318	0.174825
	9.5191	0			0.477065	0			2.13015	0			0.976318	0
	9.56179	0			0.479204	0			2.1397	0			0.980697	0
	9.56179	0.0403443			0.479204	0.357782			2.1397	0.200321			0.980697	0.174825
	9.60448	0.0403443			0.481343	0.357782			2.14925	0.200321			0.985075	0.174825
	9.60448	0			0.481343	0			2.14925	0			0.985075	0
	9.64716	0			0.483483	0			2.15881	0			0.989453	0
	9.64716	0.0403443			0.483483	0.357782			2.15881	0.200321			0.989453	0.174825
	9.68985	0.0403443			0.485622	0.357782			2.16836	0.200321			0.993831	0.174825
	9.68985	0			0.485622	0			2.16836	0			0.993831	0
	9.73254	0			0.487761	0			2.17791	0			0.998209	0
	9.73254	0.0403443			0.487761	0.357782			2.17791	0.200321			0.998209	0.174825
	9.77522	0.0403443			0.4899	0.357782			2.18746	0.200321			1.00259	0.174825
	9.77522	0			0.4899	0			2.18746	0			1.00259	0
	9.81791	0			0.49204	0			2.19701	0			1.00697	0
	9.81791	0.0403443			0.49204	0.357782			2.19701	0.200321			1.00697	0.174825
	9.8606	0.0403443			0.494179	0.357782			2.20657	0.200321			1.01134	0.174825
	9.8606	0			0.494179	0			2.20657	0			1.01134	0
	9.90328	0			0.496318	0			2.21612	0			1.01572	0
	9.90328	0.0403443			0.496318	0.357782			2.21612	0.200321			1.01572	0.174825
	9.94597	0.0403443			0.498458	0.357782			2.22567	0.200321			1.0201	0.174825
	9.94597	0			0.498458	0			2.22567	0			1.0201	0
	9.98866	0			0.500597	0			2.23522	0			1.02448	0
	9.98866	0.0403443			0.500597	0.357782			2.23522	0.200321			1.02448	0.174825
	10.0313	0.0403443			0.502736	0.357782			2.24478	0.200321			1.02886	0.174825
	10.0313	0			0.502736	0			2.24478	0			1.02886	0
	10.074	0			0.504876	0			2.25433	0			1.03323	0
	10.074	0.0403443			0.504876	0.357782			2.25433	0.200321			1.03323	0.174825
	10.1167	0.0403443			0.507015	0.357782			2.26388	0.200321			1.03761	0.174825
	10.1167	0			0.507015	0			2.26388	0			1.03761	0
	10.1594	0			0.509154	0			2.27343	0			1.04199	0
	10.1594	0.0403443			0.509154	0.357782			2.27343	0.200321			1.04199	0.174825
	10.2021	0.0403443			0.511294	0.357782			2.28299	0.200321			1.04637	0.174825
	10.2021	0			0.511294	0			2.28299	0			1.04637	0
	10.2448	0			0.513433	0			2.29254	0			1.05075	0
	10.2448	0.0403443			0.513433	0.357782			2.29254	0.200321			1.05075	0.174825
	10.2875	0.0403443			0.515572	0.357782			2.30209	0.200321			1.05512	0.174825
	10.2875	0			0.515572	0			2.30209	0			1.05512	0
	10.3301	0			0.517711	0			2.31164	0			1.0595	0
	10.3301	0.0403443			0.517711	0.357782			2.31164	0.200321			1.0595	0.174825
	10.3728	0.0403443			0.519851	0.357782			2.32119	0.200321			1.06388	0.174825
	10.3728	0			0.519851	0			2.32119	0			1.06388	0
	10.4155	0			0.52199	0			2.33075	0			1.06826	0
	10.4155	0.0403443			0.52199	0.357782			2.33075	0.200321			1.06826	0.174825
	10.4582	0.0403443			0.524129	0.357782			2.3403	0.200321			1.07264	0.174825
	10.4582	0			0.524129	0			2.3403	0			1.07264	0
	10.5009	0			0.526269	0			2.34985	0			1.07701	0
	10.5009	0.0403443			0.526269	0.357782			2.34985	0.200321			1.07701	0.174825
	10.5436	0.0403443			0.528408	0.357782			2.3594	0.200321			1.08139	0.174825
	10.5436	0			0.528408	0			2.3594	0			1.08139	0
	10.5863	0			0.530547	0			2.36896	0			1.08577	0
	10.5863	0.0403443			0.530547	0.357782			2.36896	0.200321			1.08577	0.174825
	10.629	0.0403443			0.532687	0.357782			2.37851	0.200321			1.09015	0.174825
	10.629	0			0.532687	0			2.37851	0			1.09015	0
	10.6716	0			0.534826	0			2.38806	0			1.09453	0
	10.6716	0.0403443			0.534826	0.357782			2.38806	0.200321			1.09453	0.174825
	10.7143	0.0403443			0.536965	0.357782			2.39761	0.200321			1.09891	0.174825
	10.7143	0			0.536965	0			2.39761	0			1.09891	0
	10.757	0			0.539104	0			2.40716	0			1.10328	0
	10.757	0.0403443			0.539104	0.357782			2.40716	0.200321			1.10328	0.174825
	10.7997	0.0403443			0.541244	0.357782			2.41672	0.200321			1.10766	0.174825
	10.7997	0			0.541244	0			2.41672	0			1.10766	0
	10.8424	0			0.543383	0			2.42627	0			1.11204	0
	10.8424	0.0403443			0.543383	0.357782			2.42627	0.200321			1.11204	0.174825
	10.8851	0.0403443			0.545522	0.357782			2.43582	0.200321			1.11642	0.174825
	10.8851	0			0.545522	0			2.43582	0			1.11642	0
	10.9278	0			0.547662	0			2.44537	0			1.1208	0
	10.9278	0.0403443			0.547662	0.357782			2.44537	0.200321			1.1208	0.174825
	10.9704	0.0403443			0.549801	0.357782			2.45493	0.200321			1.12517	0.174825
	10.9704	0			0.549801	0			2.45493	0			1.12517	0
	11.0131	0			0.55194	0			2.46448	0			1.12955	0
	11.0131	0.0403443			0.55194	0.357782			2.46448	0.200321			1.12955	0.174825
	11.0558	0.0403443			0.55408	0.357782			2.47403	0.200321			1.13393	0.174825
	11.0558	0			0.55408	0			2.47403	0			1.13393	0
	11.0985	0			0.556219	0			2.48358	0			1.13831	0
	11.0985	0.0403443			0.556219	0.357782			2.48358	0.200321			1.13831	0.174825
	11.1412	0.0403443			0.558358	0.357782			2.49313	0.200321			1.14269	0.174825
	11.1412	0			0.558358	0			2.49313	0			1.14269	0
	11.1839	0			0.560498	0			2.50269	0			1.14706	0
	11.1839	0.0403443			0.560498	0.357782			2.50269	0.200321			1.14706	0.174825
	11.2266	0.0403443			0.562637	0.357782			2.51224	0.200321			1.15144	0.174825
	11.2266	0			0.562637	0			2.51224	0			1.15144	0
	11.2693	0			0.564776	0			2.52179	0			1.15582	0
	11.2693	0.0403443			0.564776	0.357782			2.52179	0.200321			1.15582	0.174825
	11.3119	0.0403443			0.566915	0.357782			2.53134	0.200321			1.1602	0.174825
	11.3119	0			0.566915	0			2.53134	0			1.1602	0
	11.3546	0			0.569055	0			2.5409	0			1.16458	0
	11.3546	0.0403443			0.569055	0.357782			2.5409	0.200321			1.16458	0.174825
	11.3973	0.0403443			0.571194	0.357782			2.55045	0.200321			1.16896	0.174825
	11.3973	0			0.571194	0			2.55045	0			1.16896	0
	11.44	0			0.573333	0			2.56	0			1.17333	0
	11.44	0.0403443			0.573333	0.357782			2.56	0.200321			1.17333	0.174825
	11.4827	0.0403443			0.575473	0.357782			2.56955	0.200321			1.17771	0.174825
	11.4827	0			0.575473	0			2.56955	0			1.17771	0
	11.5254	0			0.577612	0			2.5791	0			1.18209	0
	11.5254	0.0403443			0.577612	0.357782			2.5791	0.200321			1.18209	0.174825
	11.5681	0.0403443			0.579751	0.357782			2.58866	0.200321			1.18647	0.174825
	11.5681	0			0.579751	0			2.58866	0			1.18647	0
	11.6107	0			0.581891	0			2.59821	0			1.19085	0
	11.6107	0.0403443			0.581891	0.357782			2.59821	0.200321			1.19085	0.174825
	11.6534	0.0403443			0.58403	0.357782			2.60776	0.200321			1.19522	0.174825
	11.6534	0			0.58403	0			2.60776	0			1.19522	0
	11.6961	0			0.586169	0			2.61731	0			1.1996	0
	11.6961	0.0403443			0.586169	0.357782			2.61731	0.200321			1.1996	0.174825
	11.7388	0.0403443			0.588308	0.357782			2.62687	0.200321			1.20398	0.174825
	11.7388	0			0.588308	0			2.62687	0			1.20398	0
	11.7815	0			0.590448	0			2.63642	0			1.20836	0
	11.7815	0.0403443			0.590448	0.357782			2.63642	0.200321			1.20836	0.174825
	11.8242	0.0403443			0.592587	0.357782			2.64597	0.200321			1.21274	0.174825
	11.8242	0			0.592587	0			2.64597	0			1.21274	0
	11.8669	0			0.594726	0			2.65552	0			1.21711	0
	11.8669	0.0403443			0.594726	0.357782			2.65552	0.200321			1.21711	0.174825
	11.9096	0.0403443			0.596866	0.357782			2.66507	0.200321			1.22149	0.174825
	11.9096	0			0.596866	0			2.66507	0			1.22149	0
	11.9522	0			0.599005	0			2.67463	0			1.22587	0
	11.9522	0.0403443			0.599005	0.357782			2.67463	0.200321			1.22587	0.174825
	11.9949	0.0403443			0.601144	0.357782			2.68418	0.200321			1.23025	0.174825
	11.9949	0			0.601144	0			2.68418	0			1.23025	0
	12.0376	0			0.603284	0			2.69373	0			1.23463	0
	12.0376	0.0403443			0.603284	0.357782			2.69373	0.200321			1.23463	0.174825
	12.0803	0.0403443			0.605423	0.357782			2.70328	0.200321			1.239	0.174825
	12.0803	0			0.605423	0			2.70328	0			1.239	0
	12.123	0			0.607562	0			2.71284	0			1.24338	0
	12.123	0.0403443			0.607562	0.357782			2.71284	0.200321			1.24338	0.174825
	12.1657	0.0403443			0.609701	0.357782			2.72239	0.200321			1.24776	0.174825
	12.1657	0			0.609701	0			2.72239	0			1.24776	0
	12.2084	0			0.611841	0			2.73194	0			1.25214	0
	12.2084	0.0403443			0.611841	0.357782			2.73194	0.200321			1.25214	0.174825
	12.251	0.0403443			0.61398	0.357782			2.74149	0.200321			1.25652	0.174825
	12.251	0			0.61398	0			2.74149	0			1.25652	0
	12.2937	0			0.616119	0			2.75104	0			1.2609	0
	12.2937	0.0403443			0.616119	0.357782			2.75104	0.200321			1.2609	0.174825
	12.3364	0.0403443			0.618259	0.357782			2.7606	0.200321			1.26527	0.174825
	12.3364	0			0.618259	0			2.7606	0			1.26527	0
	12.3791	0			0.620398	0			2.77015	0			1.26965	0
	12.3791	0.0403443			0.620398	0.357782			2.77015	0.200321			1.26965	0.174825
	12.4218	0.0403443			0.622537	0.357782			2.7797	0.200321			1.27403	0.174825
	12.4218	0			0.622537	0			2.7797	0			1.27403	0
	12.4645	0			0.624677	0			2.78925	0			1.27841	0
	12.4645	0.0403443			0.624677	0.357782			2.78925	0.200321			1.27841	0.174825
	12.5072	0.0403443			0.626816	0.357782			2.79881	0.200321			1.28279	0.174825
	12.5072	0			0.626816	0			2.79881	0			1.28279	0
	12.5499	0			0.628955	0			2.80836	0			1.28716	0
	12.5499	0.0403443			0.628955	0.357782			2.80836	0.200321			1.28716	0.174825
	12.5925	0.0403443			0.631095	0.357782			2.81791	0.200321			1.29154	0.174825
	12.5925	0			0.631095	0			2.81791	0			1.29154	0
	12.6352	0			0.633234	0			2.82746	0			1.29592	0
	12.6352	0.0403443			0.633234	0.357782			2.82746	0.200321			1.29592	0.174825
	12.6779	0.0403443			0.635373	0.357782			2.83701	0.200321			1.3003	0.174825
	12.6779	0			0.635373	0			2.83701	0			1.3003	0
	12.7206	0			0.637512	0			2.84657	0			1.30468	0
	12.7206	0.0403443			0.637512	0.357782			2.84657	0.200321			1.30468	0.174825
	12.7633	0.0403443			0.639652	0.357782			2.85612	0.200321			1.30905	0.174825
	12.7633	0			0.639652	0			2.85612	0			1.30905	0
	12.806	0			0.641791	0			2.86567	0			1.31343	0
	12.806	0.0403443			0.641791	0.357782			2.86567	0.200321			1.31343	0.174825
	12.8487	0.0403443			0.64393	0.357782			2.87522	0.200321			1.31781	0.174825
	12.8487	0			0.64393	0			2.87522	0			1.31781	0
	12.8913	0			0.64607	0			2.88478	0			1.32219	0
	12.8913	0.0403443			0.64607	0.357782			2.88478	0.200321			1.32219	0.174825
	12.934	0.0403443			0.648209	0.357782			2.89433	0.200321			1.32657	0.174825
	12.934	0			0.648209	0			2.89433	0			1.32657	0
	12.9767	0			0.650348	0			2.90388	0			1.33095	0
	12.9767	0.0403443			0.650348	0.357782			2.90388	0.200321			1.33095	0.174825
	13.0194	0.0403443			0.652488	0.357782			2.91343	0.200321			1.33532	0.174825
	13.0194	0			0.652488	0			2.91343	0			1.33532	0
	13.0621	0			0.654627	0			2.92299	0			1.3397	0
	13.0621	0.0403443			0.654627	0.357782			2.92299	0.200321			1.3397	0.174825
	13.1048	0.0403443			0.656766	0.357782			2.93254	0.200321			1.34408	0.174825
	13.1048	0			0.656766	0			2.93254	0			1.34408	0
	13.1475	0			0.658905	0			2.94209	0			1.34846	0
	13.1475	0.0403443			0.658905	0.357782			2.94209	0.200321			1.34846	0.174825
	13.1901	0.0403443			0.661045	0.357782			2.95164	0.200321			1.35284	0.174825
	13.1901	0			0.661045	0			2.95164	0			1.35284	0
	13.2328	0			0.663184	0			2.96119	0			1.35721	0
	13.2328	0.0403443			0.663184	0.357782			2.96119	0.200321			1.35721	0.174825
	13.2755	0.0403443			0.665323	0.357782			2.97075	0.200321			1.36159	0.174825
	13.2755	0			0.665323	0			2.97075	0			1.36159	0
	13.3182	0			0.667463	0			2.9803	0			1.36597	0
	13.3182	0.0403443			0.667463	0.357782			2.9803	0.200321			1.36597	0.174825
	13.3609	0.0403443			0.669602	0.357782			2.98985	0.200321			1.37035	0.174825
	13.3609	0			0.669602	0			2.98985	0			1.37035	0
	13.4036	0			0.671741	0			2.9994	0			1.37473	0
	13.4036	0.0403443			0.671741	0.357782			2.9994	0.200321			1.37473	0.174825
	13.4463	0.0403443			0.673881	0.357782			3.00896	0.200321			1.3791	0.174825
	13.4463	0			0.673881	0			3.00896	0			1.3791	0
	13.489	0			0.67602	0			3.01851	0			1.38348	0
	13.489	0.0403443			0.67602	0.357782			3.01851	0.200321			1.38348	0.174825
	13.5316	0.0403443			0.678159	0.357782			3.02806	0.200321			1.38786	0.174825
	13.5316	0			0.678159	0			3.02806	0			1.38786	0
	13.5743	0			0.680299	0			3.03761	0			1.39224	0
	13.5743	0.0403443			0.680299	0.357782			3.03761	0.200321			1.39224	0.174825
	13.617	0.0403443			0.682438	0.357782			3.04716	0.200321			1.39662	0.174825
	13.617	0			0.682438	0			3.04716	0			1.39662	0
	13.6597	0			0.684577	0			3.05672	0			1.401	0
	13.6597	0.0403443			0.684577	0.357782			3.05672	0.200321			1.401	0.174825
	13.7024	0.0403443			0.686716	0.357782			3.06627	0.200321			1.40537	0.174825
	13.7024	0			0.686716	0			3.06627	0			1.40537	0
	13.7451	0			0.688856	0			3.07582	0			1.40975	0
	13.7451	0.0403443			0.688856	0.357782			3.07582	0.200321			1.40975	0.174825
	13.7878	0.0403443			0.690995	0.357782			3.08537	0.200321			1.41413	0.174825
	13.7878	0			0.690995	0			3.08537	0			1.41413	0
	13.8304	0			0.693134	0			3.09493	0			1.41851	0
	13.8304	0.0403443			0.693134	0.357782			3.09493	0.200321			1.41851	0.174825
	13.8731	0.0403443			0.695274	0.357782			3.10448	0.200321			1.42289	0.174825
	13.8731	0			0.695274	0			3.10448	0			1.42289	0
	13.9158	0			0.697413	0			3.11403	0			1.42726	0
	13.9158	0.0403443			0.697413	0.357782			3.11403	0.200321			1.42726	0.174825
	13.9585	0.0403443			0.699552	0.357782			3.12358	0.200321			1.43164	0.174825
	13.9585	0			0.699552	0			3.12358	0			1.43164	0
	14.0012	0			0.701692	0			3.13313	0			1.43602	0
	14.0012	0.0403443			0.701692	0.357782			3.13313	0.200321			1.43602	0.174825
	14.0439	0.0403443			0.703831	0.357782			3.14269	0.200321			1.4404	0.174825
	14.0439	0			0.703831	0			3.14269	0			1.4404	0
	14.0866	0			0.70597	0			3.15224	0			1.44478	0
	14.0866	0.0403443			0.70597	0.357782			3.15224	0.200321			1.44478	0.174825
	14.1293	0.0403443			0.708109	0.357782			3.16179	0.200321			1.44915	0.174825
	14.1293	0			0.708109	0			3.16179	0			1.44915	0
	14.1719	0			0.710249	0			3.17134	0			1.45353	0
	14.1719	0.0403443			0.710249	0.357782			3.17134	0.200321			1.45353	0.174825
	14.2146	0.0403443			0.712388	0.357782			3.1809	0.200321			1.45791	0.174825
	14.2146	0			0.712388	0			3.1809	0			1.45791	0
	14.2573	0			0.714527	0			3.19045	0			1.46229	0
	14.2573	0.0403443			0.714527	0.357782			3.19045	0.200321			1.46229	0.174825
	14.3	0.0403443			0.716667	0.357782			3.2	0.200321			1.46667	0.174825
	14.3	0			0.716667	0			3.2	0			1.46667	0
	14.3427	0			0.718806	0			3.20955	0			1.47104	0
	14.3427	0.0403443			0.718806	0.357782			3.20955	0.200321			1.47104	0.174825
	14.3854	0.0403443			0.720945	0.357782			3.2191	0.200321			1.47542	0.174825
	14.3854	0			0.720945	0			3.2191	0			1.47542	0
	14.4281	0			0.723085	0			3.22866	0			1.4798	0
	14.4281	0.0403443			0.723085	0.357782			3.22866	0.200321			1.4798	0.174825
	14.4707	0.0403443			0.725224	0.357782			3.23821	0.200321			1.48418	0.174825
	14.4707	0			0.725224	0			3.23821	0			1.48418	0
	14.5134	0			0.727363	0			3.24776	0			1.48856	0
	14.5134	0.0403443			0.727363	0.357782			3.24776	0.200321			1.48856	0.174825
	14.5561	0.0403443			0.729502	0.357782			3.25731	0.200321			1.49294	0.174825
	14.5561	0			0.729502	0			3.25731	0			1.49294	0
	14.5988	0			0.731642	0			3.26687	0			1.49731	0
	14.5988	0.0403443			0.731642	0.357782			3.26687	0.200321			1.49731	0.174825
	14.6415	0.0403443			0.733781	0.357782			3.27642	0.200321			1.50169	0.174825
	14.6415	0			0.733781	0			3.27642	0			1.50169	0
	14.6842	0			0.73592	0			3.28597	0			1.50607	0
	14.6842	0.0403443			0.73592	0.357782			3.28597	0.200321			1.50607	0.174825
	14.7269	0.0403443			0.73806	0.357782			3.29552	0.200321			1.51045	0.174825
	14.7269	0			0.73806	0			3.29552	0			1.51045	0
	14.7696	0			0.740199	0			3.30507	0			1.51483	0
	14.7696	0.0403443			0.740199	0.357782			3.30507	0.200321			1.51483	0.174825
	14.8122	0.0403443			0.742338	0.357782			3.31463	0.200321			1.5192	0.174825
	14.8122	0			0.742338	0			3.31463	0			1.5192	0
	14.8549	0			0.744478	0			3.32418	0			1.52358	0
	14.8549	0.0403443			0.744478	0.357782			3.32418	0.200321			1.52358	0.174825
	14.8976	0.0403443			0.746617	0.357782			3.33373	0.200321			1.52796	0.174825
	14.8976	0			0.746617	0			3.33373	0			1.52796	0
	14.9403	0			0.748756	0			3.34328	0			1.53234	0
	14.9403	0.0403443			0.748756	0.357782			3.34328	0.200321			1.53234	0.174825
	14.983	0.0403443			0.750896	0.357782			3.35284	0.200321			1.53672	0.174825
	14.983	0			0.750896	0			3.35284	0			1.53672	0
	15.0257	0			0.753035	0			3.36239	0			1.54109	0
	15.0257	0.0403443			0.753035	0.357782			3.36239	0.200321			1.54109	0.174825
	15.0684	0.0403443			0.755174	0.357782			3.37194	0.200321			1.54547	0.174825
	15.0684	0			0.755174	0			3.37194	0			1.54547	0
	15.111	0			0.757313	0			3.38149	0			1.54985	0
	15.111	0.0403443			0.757313	0.357782			3.38149	0.200321			1.54985	0.174825
	15.1537	0.0403443			0.759453	0.357782			3.39104	0.200321			1.55423	0.174825
	15.1537	0			0.759453	0			3.39104	0			1.55423	0
	15.1964	0			0.761592	0			3.4006	0			1.55861	0
	15.1964	0.0403443			0.761592	0.357782			3.4006	0.200321			1.55861	0.174825
	15.2391	0.0403443			0.763731	0.357782			3.41015	0.200321			1.56299	0.174825
	15.2391	0			0.763731	0			3.41015	0			1.56299	0
	15.2818	0			0.765871	0			3.4197	0			1.56736	0
	15.2818	0.0403443			0.765871	0.357782			3.4197	0.200321			1.56736	0.174825
	15.3245	0.0403443			0.76801	0.357782			3.42925	0.200321			1.57174	0.174825
	15.3245	0			0.76801	0			3.42925	0			1.57174	0
	15.3672	0			0.770149	0			3.43881	0			1.57612	0
	15.3672	0.0403443			0.770149	0.357782			3.43881	0.200321			1.57612	0.174825
	15.4099	0.0403443			0.772289	0.357782			3.44836	0.200321			1.5805	0.174825
	15.4099	0			0.772289	0			3.44836	0			1.5805	0
	15.4525	0			0.774428	0			3.45791	0			1.58488	0
	15.4525	0.0403443			0.774428	0.357782			3.45791	0.200321			1.58488	0.174825
	15.4952	0.0403443			0.776567	0.357782			3.46746	0.200321			1.58925	0.174825
	15.4952	0			0.776567	0			3.46746	0			1.58925	0
	15.5379	0			0.778706	0			3.47701	0			1.59363	0
	15.5379	0.0403443			0.778706	0.357782			3.47701	0.200321			1.59363	0.174825
	15.5806	0.0403443			0.780846	0.357782			3.48657	0.200321			1.59801	0.174825
	15.5806	0			0.780846	0			3.48657	0			1.59801	0
	15.6233	0			0.782985	0			3.49612	0			1.60239	0
	15.6233	0.0403443			0.782985	0.357782			3.49612	0.200321			1.60239	0.174825
	15.666	0.0403443			0.785124	0.357782			3.50567	0.200321			1.60677	0.174825
	15.666	0			0.785124	0			3.50567	0			1.60677	0
	15.7087	0			0.787264	0			3.51522	0			1.61114	0
	15.7087	0.0403443			0.787264	0.357782			3.51522	0.200321			1.61114	0.174825
	15.7513	0.0403443			0.789403	0.357782			3.52478	0.200321			1.61552	0.174825
	15.7513	0			0.789403	0			3.52478	0			1.61552	0
	15.794	0			0.791542	0			3.53433	0			1.6199	0
	15.794	0.0403443			0.791542	0.357782			3.53433	0.200321			1.6199	0.174825
	15.8367	0.0403443			0.793682	0.357782			3.54388	0.200321			1.62428	0.174825
	15.8367	0			0.793682	0			3.54388	0			1.62428	0
	15.8794	0			0.795821	0			3.55343	0			1.62866	0
	15.8794	0.0403443			0.795821	0.357782			3.55343	0.200321			1.62866	0.174825
	15.9221	0.0403443			0.79796	0.357782			3.56299	0.200321			1.63303	0.174825
	15.9221	0			0.79796	0			3.56299	0			1.63303	0
	15.9648	0			0.8001	0			3.57254	0			1.63741	0
	15.9648	0.0403443			0.8001	0.357782			3.57254	0.200321			1.63741	0.174825
	16.0075	0.0403443			0.802239	0.357782			3.58209	0.200321			1.64179	0.174825
	16.0075	0			0.802239	0			3.58209	0			1.64179	0
	16.0501	0			0.804378	0			3.59164	0			1.64617	0
	16.0501	0.0403443			0.804378	0.357782			3.59164	0.200321			1.64617	0.174825
	16.0928	0.0403443			0.806517	0.357782			3.60119	0.200321			1.65055	0.174825
	16.0928	0			0.806517	0			3.60119	0			1.65055	0
	16.1355	0			0.808657	0			3.61075	0			1.65493	0
	16.1355	0.0403443			0.808657	0.357782			3.61075	0.200321			1.65493	0.174825
	16.1782	0.0403443			0.810796	0.357782			3.6203	0.200321			1.6593	0.174825
	16.1782	0			0.810796	0			3.6203	0			1.6593	0
	16.2209	0			0.812935	0			3.62985	0			1.66368	0
	16.2209	0.0403443			0.812935	0.357782			3.62985	0.200321			1.66368	0.174825
	16.2636	0.0403443			0.815075	0.357782			3.6394	0.200321			1.66806	0.174825
	16.2636	0			0.815075	0			3.6394	0			1.66806	0
	16.3063	0			0.817214	0			3.64896	0			1.67244	0
	16.3063	0.0403443			0.817214	0.357782			3.64896	0.200321			1.67244	0.174825
	16.349	0.0403443			0.819353	0.357782			3.65851	0.200321			1.67682	0.174825
	16.349	0			0.819353	0			3.65851	0			1.67682	0
	16.3916	0			0.821493	0			3.66806	0			1.68119	0
	16.3916	0.0403443			0.821493	0.357782			3.66806	0.200321			1.68119	0.174825
	16.4343	0.0403443			0.823632	0.357782			3.67761	0.200321			1.68557	0.174825
	16.4343	0			0.823632	0			3.67761	0			1.68557	0
	16.477	0			0.825771	0			3.68716	0			1.68995	0
	16.477	0.0403443			0.825771	0.357782			3.68716	0.200321			1.68995	0.174825
	16.5197	0.0403443			0.82791	0.357782			3.69672	0.200321			1.69433	0.174825
	16.5197	0			0.82791	0			3.69672	0			1.69433	0
	16.5624	0			0.83005	0			3.70627	0			1.69871	0
	16.5624	0.0403443			0.83005	0.357782			3.70627	0.200321			1.69871	0.174825
	16.6051	0.0403443			0.832189	0.357782			3.71582	0.200321			1.70308	0.174825
	16.6051	0			0.832189	0			3.71582	0			1.70308	0
	16.6478	0			0.834328	0			3.72537	0			1.70746	0
	16.6478	0.0403443			0.834328	0.357782			3.72537	0.200321			1.70746	0.174825
	16.6904	0.0403443			0.836468	0.357782			3.73493	0.200321			1.71184	0.174825
	16.6904	0			0.836468	0			3.73493	0			1.71184	0
	16.7331	0			0.838607	0			3.74448	0			1.71622	0
	16.7331	0.0403443			0.838607	0.357782			3.74448	0.200321			1.71622	0.174825
	16.7758	0.0403443			0.840746	0.357782			3.75403	0.200321			1.7206	0.174825
	16.7758	0			0.840746	0			3.75403	0			1.7206	0
	16.8185	0			0.842886	0			3.76358	0			1.72498	0
	16.8185	0.0403443			0.842886	0.357782			3.76358	0.200321			1.72498	0.174825
	16.8612	0.0403443			0.845025	0.357782			3.77313	0.200321			1.72935	0.174825
	16.8612	0			0.845025	0			3.77313	0			1.72935	0
	16.9039	0			0.847164	0			3.78269	0			1.73373	0
	16.9039	0.0403443			0.847164	0.357782			3.78269	0.200321			1.73373	0.174825
	16.9466	0.0403443			0.849303	0.357782			3.79224	0.200321			1.73811	0.174825
	16.9466	0			0.849303	0			3.79224	0			1.73811	0
	16.9893	0			0.851443	0			3.80179	0			1.74249	0
	16.9893	0.0403443			0.851443	0.357782			3.80179	0.200321			1.74249	0.174825
	17.0319	0.0403443			0.853582	0.357782			3.81134	0.200321			1.74687	0.174825
	17.0319	0			0.853582	0			3.81134	0			1.74687	0
	17.0746	0			0.855721	0			3.8209	0			1.75124	0
	17.0746	0.0403443			0.855721	0.357782			3.8209	0.200321			1.75124	0.174825
	17.1173	0.0403443			0.857861	0.357782			3.83045	0.200321			1.75562	0.174825
	17.1173	0			0.857861	0			3.83045	0			1.75562	0
	17.16	0			0.86	0			3.84	0			1.76	0
	17.16	0			0.86	0.0894454			3.84	0			1.76	0.305944
	17.2027	0			0.862139	0.0894454			3.84955	0			1.76438	0.305944
	17.2027	0			0.862139	0			3.84955	0			1.76438	0
	17.2454	0			0.864279	0			3.8591	0			1.76876	0
	17.2454	0			0.864279	0.0894454			3.8591	0			1.76876	0.305944
	17.2881	0			0.866418	0.0894454			3.86866	0			1.77313	0.305944
	17.2881	0			0.866418	0			3.86866	0			1.77313	0
	17.3307	0			0.868557	0			3.87821	0			1.77751	0
	17.3307	0			0.868557	0.0894454			3.87821	0			1.77751	0.305944
	17.3734	0			0.870697	0.0894454			3.88776	0			1.78189	0.305944
	17.3734	0			0.870697	0			3.88776	0			1.78189	0
	17.4161	0			0.872836	0			3.89731	0			1.78627	0
	17.4161	0			0.872836	0.0894454			3.89731	0			1.78627	0.305944
	17.4588	0			0.874975	0.0894454			3.90687	0			1.79065	0.305944
	17.4588	0			0.874975	0			3.90687	0			1.79065	0
	17.5015	0			0.877114	0			3.91642	0			1.79502	0
	17.5015	0			0.877114	0.0894454			3.91642	0			1.79502	0.305944
	17.5442	0			0.879254	0.0894454			3.92597	0			1.7994	0.305944
	17.5442	0			0.879254	0			3.92597	0			1.7994	0
	17.5869	0			0.881393	0			3.93552	0			1.80378	0
	17.5869	0			0.881393	0.0894454			3.93552	0			1.80378	0.305944
	17.6296	0			0.883532	0.0894454			3.94507	0			1.80816	0.305944
	17.6296	0			0.883532	0			3.94507	0			1.80816	0
	17.6722	0			0.885672	0			3.95463	0			1.81254	0
	17.6722	0			0.885672	0.0894454			3.95463	0			1.81254	0.305944
	17.7149	0			0.887811	0.0894454			3.96418	0			1.81692	0.305944
	17.7149	0			0.887811	0			3.96418	0			1.81692	0
	17.7576	0			0.88995	0			3.97373	0			1.82129	0
	17.7576	0			0.88995	0.0894454			3.97373	0			1.82129	0.305944
	17.8003	0			0.89209	0.0894454			3.98328	0			1.82567	0.305944
	17.8003	0			0.89209	0			3.98328	0			1.82567	0
	17.843	0			0.894229	0			3.99284	0			1.83005	0
	17.843	0			0.894229	0.0894454			3.99284	0			1.83005	0.305944
	17.8857	0			0.896368	0.0894454			4.00239	0			1.83443	0.305944
	17.8857	0			0.896368	0			4.00239	0			1.83443	0
	17.9284	0			0.898507	0			4.01194	0			1.83881	0
	17.9284	0			0.898507	0.0894454			4.01194	0			1.83881	0.305944
	17.971	0			0.900647	0.0894454			4.02149	0			1.84318	0.305944
	17.971	0			0.900647	0			4.02149	0			1.84318	0
	18.0137	0			0.902786	0			4.03104	0			1.84756	0
	18.0137	0			0.902786	0.0894454			4.03104	0			1.84756	0.305944
	18.0564	0			0.904925	0.0894454			4.0406	0			1.85194	0.305944
	18.0564	0			0.904925	0			4.0406	0			1.85194	0
	18.0991	0			0.907065	0			4.05015	0			1.85632	0
	18.0991	0			0.907065	0.0894454			4.05015	0			1.85632	0.305944
	18.1418	0			0.909204	0.0894454			4.0597	0			1.8607	0.305944
	18.1418	0			0.909204	0			4.0597	0			1.8607	0
	18.1845	0			0.911343	0			4.06925	0			1.86507	0
	18.1845	0			0.911343	0.0894454			4.06925	0			1.86507	0.305944
	18.2272	0			0.913483	0.0894454			4.07881	0			1.86945	0.305944
	18.2272	0			0.913483	0			4.07881	0			1.86945	0
	18.2699	0			0.915622	0			4.08836	0			1.87383	0
	18.2699	0			0.915622	0.0894454			4.08836	0			1.87383	0.305944
	18.3125	0			0.917761	0.0894454			4.09791	0			1.87821	0.305944
	18.3125	0			0.917761	0			4.09791	0			1.87821	0
	18.3552	0			0.9199	0			4.10746	0			1.88259	0
	18.3552	0			0.9199	0.0894454			4.10746	0			1.88259	0.305944
	18.3979	0			0.92204	0.0894454			4.11701	0			1.88697	0.305944
	18.3979	0			0.92204	0			4.11701	0			1.88697	0
	18.4406	0			0.924179	0			4.12657	0			1.89134	0
	18.4406	0			0.924179	0.0894454			4.12657	0			1.89134	0.305944
	18.4833	0			0.926318	0.0894454			4.13612	0			1.89572	0.305944
	18.4833	0			0.926318	0			4.13612	0			1.89572	0
	18.526	0			0.928458	0			4.14567	0			1.9001	0
	18.526	0			0.928458	0.0894454			4.14567	0			1.9001	0.305944
	18.5687	0			0.930597	0.0894454			4.15522	0			1.90448	0.305944
	18.5687	0			0.930597	0			4.15522	0			1.90448	0
	18.6113	0			0.932736	0			4.16478	0			1.90886	0
	18.6113	0			0.932736	0.0894454			4.16478	0			1.90886	0.305944
	18.654	0			0.934876	0.0894454			4.17433	0			1.91323	0.305944
	18.654	0			0.934876	0			4.17433	0			1.91323	0
	18.6967	0			0.937015	0			4.18388	0			1.91761	0
	18.6967	0			0.937015	0.0894454			4.18388	0			1.91761	0.305944
	18.7394	0			0.939154	0.0894454			4.19343	0			1.92199	0.305944
	18.7394	0			0.939154	0			4.19343	0			1.92199	0
	18.7821	0			0.941294	0			4.20299	0			1.92637	0
	18.7821	0			0.941294	0.0894454			4.20299	0			1.92637	0.305944
	18.8248	0			0.943433	0.0894454			4.21254	0			1.93075	0.305944
	18.8248	0			0.943433	0			4.21254	0			1.93075	0
	18.8675	0			0.945572	0			4.22209	0			1.93512	0
	18.8675	0			0.945572	0.0894454			4.22209	0			1.93512	0.305944
	18.9101	0			0.947711	0.0894454			4.23164	0			1.9395	0.305944
	18.9101	0			0.947711	0			4.23164	0			1.9395	0
	18.9528	0			0.949851	0			4.24119	0			1.94388	0
	18.9528	0			0.949851	0.0894454			4.24119	0			1.94388	0.305944
	18.9955	0			0.95199	0.0894454			4.25075	0			1.94826	0.305944
	18.9955	0			0.95199	0			4.25075	0			1.94826	0
	19.0382	0			0.954129	0			4.2603	0			1.95264	0
	19.0382	0			0.954129	0.0894454			4.2603	0			1.95264	0.305944
	19.0809	0			0.956269	0.0894454			4.26985	0			1.95701	0.305944
	19.0809	0			0.956269	0			4.26985	0			1.95701	0
	19.1236	0			0.958408	0			4.2794	0			1.96139	0
	19.1236	0			0.958408	0.0894454			4.2794	0			1.96139	0.305944
	19.1663	0			0.960547	0.0894454			4.28896	0			1.96577	0.305944
	19.1663	0			0.960547	0			4.28896	0			1.96577	0
	19.209	0			0.962687	0			4.29851	0			1.97015	0
	19.209	0			0.962687	0.0894454			4.29851	0			1.97015	0.305944
	19.2516	0			0.964826	0.0894454			4.30806	0			1.97453	0.305944
	19.2516	0			0.964826	0			4.30806	0			1.97453	0
	19.2943	0			0.966965	0			4.31761	0			1.97891	0
	19.2943	0			0.966965	0.0894454			4.31761	0			1.97891	0.305944
	19.337	0			0.969104	0.0894454			4.32716	0			1.98328	0.305944
	19.337	0			0.969104	0			4.32716	0			1.98328	0
	19.3797	0			0.971244	0			4.33672	0			1.98766	0
	19.3797	0			0.971244	0.0894454			4.33672	0			1.98766	0.305944
	19.4224	0			0.973383	0.0894454			4.34627	0			1.99204	0.305944
	19.4224	0			0.973383	0			4.34627	0			1.99204	0
	19.4651	0			0.975522	0			4.35582	0			1.99642	0
	19.4651	0			0.975522	0.0894454			4.35582	0			1.99642	0.305944
	19.5078	0			0.977662	0.0894454			4.36537	0			2.0008	0.305944
	19.5078	0			0.977662	0			4.36537	0			2.0008	0
	19.5504	0			0.979801	0			4.37493	0			2.00517	0
	19.5504	0			0.979801	0.0894454			4.37493	0			2.00517	0.305944
	19.5931	0			0.98194	0.0894454			4.38448	0			2.00955	0.305944
	19.5931	0			0.98194	0			4.38448	0			2.00955	0
	19.6358	0			0.98408	0			4.39403	0			2.01393	0
	19.6358	0			0.98408	0.0894454			4.39403	0			2.01393	0.305944
	19.6785	0			0.986219	0.0894454			4.40358	0			2.01831	0.305944
	19.6785	0			0.986219	0			4.40358	0			2.01831	0
	19.7212	0			0.988358	0			4.41313	0			2.02269	0
	19.7212	0			0.988358	0.0894454			4.41313	0			2.02269	0.305944
	19.7639	0			0.990498	0.0894454			4.42269	0			2.02706	0.305944
	19.7639	0			0.990498	0			4.42269	0			2.02706	0
	19.8066	0			0.992637	0			4.43224	0			2.03144	0
	19.8066	0			0.992637	0.0894454			4.43224	0			2.03144	0.305944
	19.8493	0			0.994776	0.0894454			4.44179	0			2.03582	0.305944
	19.8493	0			0.994776	0			4.44179	0			2.03582	0
	19.8919	0			0.996915	0			4.45134	0			2.0402	0
	19.8919	0			0.996915	0.0894454			4.45134	0			2.0402	0.305944
	19.9346	0			0.999055	0.0894454			4.4609	0			2.04458	0.305944
	19.9346	0			0.999055	0			4.4609	0			2.04458	0
	19.9773	0			1.00119	0			4.47045	0			2.04896	0
	19.9773	0			1.00119	0.0894454			4.47045	0			2.04896	0.305944
	20.02	0			1.00333	0.0894454			4.48	0			2.05333	0.305944
	20.02	0			1.00333	0			4.48	0			2.05333	0
	20.0627	0			1.00547	0			4.48955	0			2.05771	0
	20.0627	0			1.00547	0.0894454			4.48955	0			2.05771	0.305944
	20.1054	0			1.00761	0.0894454			4.4991	0			2.06209	0.305944
	20.1054	0			1.00761	0			4.4991	0			2.06209	0
	20.1481	0			1.00975	0			4.50866	0			2.06647	0
	20.1481	0			1.00975	0.0894454			4.50866	0			2.06647	0.305944
	20.1907	0			1.01189	0.0894454			4.51821	0			2.07085	0.305944
	20.1907	0			1.01189	0			4.51821	0			2.07085	0
	20.2334	0			1.01403	0			4.52776	0			2.07522	0
	20.2334	0			1.01403	0.0894454			4.52776	0			2.07522	0.305944
	20.2761	0			1.01617	0.0894454			4.53731	0			2.0796	0.305944
	20.2761	0			1.01617	0			4.53731	0			2.0796	0
	20.3188	0			1.01831	0			4.54687	0			2.08398	0
	20.3188	0			1.01831	0.0894454			4.54687	0			2.08398	0.305944
	20.3615	0			1.02045	0.0894454			4.55642	0			2.08836	0.305944
	20.3615	0			1.02045	0			4.55642	0			2.08836	0
	20.4042	0			1.02259	0			4.56597	0			2.09274	0
	20.4042	0			1.02259	0.0894454			4.56597	0			2.09274	0.305944
	20.4469	0			1.02473	0.0894454			4.57552	0			2.09711	0.305944
	20.4469	0			1.02473	0			4.57552	0			2.09711	0
	20.4896	0			1.02687	0			4.58507	0			2.10149	0
	20.4896	0			1.02687	0.0894454			4.58507	0			2.10149	0.305944
	20.5322	0			1.029	0.0894454			4.59463	0			2.10587	0.305944
	20.5322	0			1.029	0			4.59463	0			2.10587	0
	20.5749	0			1.03114	0			4.60418	0			2.11025	0
	20.5749	0			1.03114	0.0894454			4.60418	0			2.11025	0.305944
	20.6176	0			1.03328	0.0894454			4.61373	0			2.11463	0.305944
	20.6176	0			1.03328	0			4.61373	0			2.11463	0
	20.6603	0			1.03542	0			4.62328	0			2.119	0
	20.6603	0			1.03542	0.0894454			4.62328	0			2.119	0.305944
	20.703	0			1.03756	0.0894454			4.63284	0			2.12338	0.305944
	20.703	0			1.03756	0			4.63284	0			2.12338	0
	20.7457	0			1.0397	0			4.64239	0			2.12776	0
	20.7457	0			1.0397	0.0894454			4.64239	0			2.12776	0.305944
	20.7884	0			1.04184	0.0894454			4.65194	0			2.13214	0.305944
	20.7884	0			1.04184	0			4.65194	0			2.13214	0
	20.831	0			1.04398	0			4.66149	0			2.13652	0
	20.831	0			1.04398	0.0894454			4.66149	0			2.13652	0.305944
	20.8737	0			1.04612	0.0894454			4.67104	0			2.1409	0.305944
	20.8737	0			1.04612	0			4.67104	0			2.1409	0
	20.9164	0			1.04826	0			4.6806	0			2.14527	0
	20.9164	0			1.04826	0.0894454			4.6806	0			2.14527	0.305944
	20.9591	0			1.0504	0.0894454			4.69015	0			2.14965	0.305944
	20.9591	0			1.0504	0			4.69015	0			2.14965	0
	21.0018	0			1.05254	0			4.6997	0			2.15403	0
	21.0018	0			1.05254	0.0894454			4.6997	0			2.15403	0.305944
	21.0445	0			1.05468	0.0894454			4.70925	0			2.15841	0.305944
	21.0445	0			1.05468	0			4.70925	0			2.15841	0
	21.0872	0			1.05682	0			4.71881	0			2.16279	0
	21.0872	0			1.05682	0.0894454			4.71881	0			2.16279	0.305944
	21.1299	0			1.05896	0.0894454			4.72836	0			2.16716	0.305944
	21.1299	0			1.05896	0			4.72836	0			2.16716	0
	21.1725	0			1.06109	0			4.73791	0			2.17154	0
	21.1725	0			1.06109	0.0894454			4.73791	0			2.17154	0.305944
	21.2152	0			1.06323	0.0894454			4.74746	0			2.17592	0.305944
	21.2152	0			1.06323	0			4.74746	0			2.17592	0
	21.2579	0			1.06537	0			4.75701	0			2.1803	0
	21.2579	0			1.06537	0.0894454			4.75701	0			2.1803	0.305944
	21.3006	0			1.06751	0.0894454			4.76657	0			2.18468	0.305944
	21.3006	0			1.06751	0			4.76657	0			2.18468	0
	21.3433	0			1.06965	0			4.77612	0			2.18905	0
	21.3433	0			1.06965	0.0894454			4.77612	0			2.18905	0.305944
	21.386	0			1.07179	0.0894454			4.78567	0			2.19343	0.305944
	21.386	0			1.07179	0			4.78567	0			2.19343	0
	21.4287	0			1.07393	0			4.79522	0			2.19781	0
	21.4287	0			1.07393	0.0894454			4.79522	0			2.19781	0.305944
	21.4713	0			1.07607	0.0894454			4.80478	0			2.20219	0.305944
	21.4713	0			1.07607	0			4.80478	0			2.20219	0
	21.514	0			1.07821	0			4.81433	0			2.20657	0
	21.514	0			1.07821	0.0894454			4.81433	0			2.20657	0.305944
	21.5567	0			1.08035	0.0894454			4.82388	0			2.21095	0.305944
	21.5567	0			1.08035	0			4.82388	0			2.21095	0
	21.5994	0			1.08249	0			4.83343	0			2.21532	0
	21.5994	0			1.08249	0.0894454			4.83343	0			2.21532	0.305944
	21.6421	0			1.08463	0.0894454			4.84299	0			2.2197	0.305944
	21.6421	0			1.08463	0			4.84299	0			2.2197	0
	21.6848	0			1.08677	0			4.85254	0			2.22408	0
	21.6848	0			1.08677	0.0894454			4.85254	0			2.22408	0.305944
	21.7275	0			1.08891	0.0894454			4.86209	0			2.22846	0.305944
	21.7275	0			1.08891	0			4.86209	0			2.22846	0
	21.7701	0			1.09104	0			4.87164	0			2.23284	0
	21.7701	0			1.09104	0.0894454			4.87164	0			2.23284	0.305944
	21.8128	0			1.09318	0.0894454			4.88119	0			2.23721	0.305944
	21.8128	0			1.09318	0			4.88119	0			2.23721	0
	21.8555	0			1.09532	0			4.89075	0			2.24159	0
	21.8555	0			1.09532	0.0894454			4.89075	0			2.24159	0.305944
	21.8982	0			1.09746	0.0894454			4.9003	0			2.24597	0.305944
	21.8982	0			1.09746	0			4.9003	0			2.24597	0
	21.9409	0			1.0996	0			4.90985	0			2.25035	0
	21.9409	0			1.0996	0.0894454			4.90985	0			2.25035	0.305944
	21.9836	0			1.10174	0.0894454			4.9194	0			2.25473	0.305944
	21.9836	0			1.10174	0			4.9194	0			2.25473	0
	22.0263	0			1.10388	0			4.92896	0			2.2591	0
	22.0263	0			1.10388	0.0894454			4.92896	0			2.2591	0.305944
	22.069	0			1.10602	0.0894454			4.93851	0			2.26348	0.305944
	22.069	0			1.10602	0			4.93851	0			2.26348	0
	22.1116	0			1.10816	0			4.94806	0			2.26786	0
	22.1116	0			1.10816	0.0894454			4.94806	0			2.26786	0.305944
	22.1543	0			1.1103	0.0894454			4.95761	0			2.27224	0.305944
	22.1543	0			1.1103	0			4.95761	0			2.27224	0
	22.197	0			1.11244	0			4.96716	0			2.27662	0
	22.197	0			1.11244	0.0894454			4.96716	0			2.27662	0.305944
	22.2397	0			1.11458	0.0894454			4.97672	0			2.281	0.305944
	22.2397	0			1.11458	0			4.97672	0			2.281	0
	22.2824	0			1.11672	0			4.98627	0			2.28537	0
	22.2824	0			1.11672	0.0894454			4.98627	0			2.28537	0.305944
	22.3251	0			1.11886	0.0894454			4.99582	0			2.28975	0.305944
	22.3251	0			1.11886	0			4.99582	0			2.28975	0
	22.3678	0			1.121	0			5.00537	0			2.29413	0
	22.3678	0			1.121	0.0894454			5.00537	0			2.29413	0.305944
	22.4104	0			1.12313	0.0894454			5.01493	0			2.29851	0.305944
	22.4104	0			1.12313	0			5.01493	0			2.29851	0
	22.4531	0			1.12527	0			5.02448	0			2.30289	0
	22.4531	0			1.12527	0.0894454			5.02448	0			2.30289	0.305944
	22.4958	0			1.12741	0.0894454			5.03403	0			2.30726	0.305944
	22.4958	0			1.12741	0			5.03403	0			2.30726	0
	22.5385	0			1.12955	0			5.04358	0			2.31164	0
	22.5385	0			1.12955	0.0894454			5.04358	0			2.31164	0.305944
	22.5812	0			1.13169	0.0894454			5.05313	0			2.31602	0.305944
	22.5812	0			1.13169	0			5.05313	0			2.31602	0
	22.6239	0			1.13383	0			5.06269	0			2.3204	0
	22.6239	0			1.13383	0.0894454			5.06269	0			2.3204	0.305944
	22.6666	0			1.13597	0.0894454			5.07224	0			2.32478	0.305944
	22.6666	0			1.13597	0			5.07224	0			2.32478	0
	22.7093	0			1.13811	0			5.08179	0			2.32915	0
	22.7093	0			1.13811	0.0894454			5.08179	0			2.32915	0.305944
	22.7519	0			1.14025	0.0894454			5.09134	0			2.33353	0.305944
	22.7519	0			1.14025	0			5.09134	0			2.33353	0
	22.7946	0			1.14239	0			5.1009	0			2.33791	0
	22.7946	0			1.14239	0.0894454			5.1009	0			2.33791	0.305944
	22.8373	0			1.14453	0.0894454			5.11045	0			2.34229	0.305944
	22.8373	0			1.14453	0			5.11045	0			2.34229	0
	22.88	0			1.14667	0			5.12	0			2.34667	0
	22.88	0			1.14667	0.0894454			5.12	0			2.34667	0.305944
	22.9227	0			1.14881	0.0894454			5.12955	0			2.35104	0.305944
	22.9227	0			1.14881	0			5.12955	0			2.35104	0
	22.9654	0			1.15095	0			5.1391	0			2.35542	0
	22.9654	0			1.15095	0.0894454			5.1391	0			2.35542	0.305944
	23.0081	0			1.15308	0.0894454			5.14866	0			2.3598	0.305944
	23.0081	0			1.15308	0			5.14866	0			2.3598	0
	23.0507	0			1.15522	0			5.15821	0			2.36418	0
	23.0507	0			1.15522	0.0894454			5.15821	0			2.36418	0.305944
	23.0934	0			1.15736	0.0894454			5.16776	0			2.36856	0.305944
	23.0934	0			1.15736	0			5.16776	0			2.36856	0
	23.1361	0			1.1595	0			5.17731	0			2.37294	0
	23.1361	0			1.1595	0.0894454			5.17731	0			2.37294	0.305944
	23.1788	0			1.16164	0.0894454			5.18687	0			2.37731	0.305944
	23.1788	0			1.16164	0			5.18687	0			2.37731	0
	23.2215	0			1.16378	0			5.19642	0			2.38169	0
	23.2215	0			1.16378	0.0894454			5.19642	0			2.38169	0.305944
	23.2642	0			1.16592	0.0894454			5.20597	0			2.38607	0.305944
	23.2642	0			1.16592	0			5.20597	0			2.38607	0
	23.3069	0			1.16806	0			5.21552	0			2.39045	0
	23.3069	0			1.16806	0.0894454			5.21552	0			2.39045	0.305944
	23.3496	0			1.1702	0.0894454			5.22507	0			2.39483	0.305944
	23.3496	0			1.1702	0			5.22507	0			2.39483	0
	23.3922	0			1.17234	0			5.23463	0			2.3992	0
	23.3922	0			1.17234	0.0894454			5.23463	0			2.3992	0.305944
	23.4349	0			1.17448	0.0894454			5.24418	0			2.40358	0.305944
	23.4349	0			1.17448	0			5.24418	0			2.40358	0
	23.4776	0			1.17662	0			5.25373	0			2.40796	0
	23.4776	0			1.17662	0.0894454			5.25373	0			2.40796	0.305944
	23.5203	0			1.17876	0.0894454			5.26328	0			2.41234	0.305944
	23.5203	0			1.17876	0			5.26328	0			2.41234	0
	23.563	0			1.1809	0			5.27284	0			2.41672	0
	23.563	0			1.1809	0.0894454			5.27284	0			2.41672	0.305944
	23.6057	0			1.18303	0.0894454			5.28239	0			2.42109	0.305944
	23.6057	0			1.18303	0			5.28239	0			2.42109	0
	23.6484	0			1.18517	0			5.29194	0			2.42547	0
	23.6484	0			1.18517	0.0894454			5.29194	0			2.42547	0.305944
	23.691	0			1.18731	0.0894454			5.30149	0			2.42985	0.305944
	23.691	0			1.18731	0			5.30149	0			2.42985	0
	23.7337	0			1.18945	0			5.31104	0			2.43423	0
	23.7337	0			1.18945	0.0894454			5.31104	0			2.43423	0.305944
	23.7764	0			1.19159	0.0894454			5.3206	0			2.43861	0.305944
	23.7764	0			1.19159	0			5.3206	0			2.43861	0
	23.8191	0			1.19373	0			5.33015	0			2.44299	0
	23.8191	0			1.19373	0.0894454			5.33015	0			2.44299	0.305944
	23.8618	0			1.19587	0.0894454			5.3397	0			2.44736	0.305944
	23.8618	0			1.19587	0			5.3397	0			2.44736	0
	23.9045	0			1.19801	0			5.34925	0			2.45174	0
	23.9045	0			1.19801	0.0894454			5.34925	0			2.45174	0.305944
	23.9472	0			1.20015	0.0894454			5.35881	0			2.45612	0.305944
	23.9472	0			1.20015	0			5.35881	0			2.45612	0
	23.9899	0			1.20229	0			5.36836	0			2.4605	0
	23.9899	0			1.20229	0.0894454			5.36836	0			2.4605	0.305944
	24.0325	0			1.20443	0.0894454			5.37791	0			2.46488	0.305944
	24.0325	0			1.20443	0			5.37791	0			2.46488	0
	24.0752	0			1.20657	0			5.38746	0			2.46925	0
	24.0752	0			1.20657	0.0894454			5.38746	0			2.46925	0.305944
	24.1179	0			1.20871	0.0894454			5.39701	0			2.47363	0.305944
	24.1179	0			1.20871	0			5.39701	0			2.47363	0
	24.1606	0			1.21085	0			5.40657	0			2.47801	0
	24.1606	0			1.21085	0.0894454			5.40657	0			2.47801	0.305944
	24.2033	0			1.21299	0.0894454			5.41612	0			2.48239	0.305944
	24.2033	0			1.21299	0			5.41612	0			2.48239	0
	24.246	0			1.21512	0			5.42567	0			2.48677	0
	24.246	0			1.21512	0.0894454			5.42567	0			2.48677	0.305944
	24.2887	0			1.21726	0.0894454			5.43522	0			2.49114	0.305944
	24.2887	0			1.21726	0			5.43522	0			2.49114	0
	24.3313	0			1.2194	0			5.44478	0			2.49552	0
	24.3313	0			1.2194	0.0894454			5.44478	0			2.49552	0.305944
	24.374	0			1.22154	0.0894454			5.45433	0			2.4999	0.305944
	24.374	0			1.22154	0			5.45433	0			2.4999	0
	24.4167	0			1.22368	0			5.46388	0			2.50428	0
	24.4167	0			1.22368	0.0894454			5.46388	0			2.50428	0.305944
	24.4594	0			1.22582	0.0894454			5.47343	0			2.50866	0.305944
	24.4594	0			1.22582	0			5.47343	0			2.50866	0
	24.5021	0			1.22796	0			5.48299	0			2.51303	0
	24.5021	0			1.22796	0.0894454			5.48299	0			2.51303	0.305944
	24.5448	0			1.2301	0.0894454			5.49254	0			2.51741	0.305944
	24.5448	0			1.2301	0			5.49254	0			2.51741	0
	24.5875	0			1.23224	0			5.50209	0			2.52179	0
	24.5875	0			1.23224	0.0894454			5.50209	0			2.52179	0.305944
	24.6301	0			1.23438	0.0894454			5.51164	0			2.52617	0.305944
	24.6301	0			1.23438	0			5.51164	0			2.52617	0
	24.6728	0			1.23652	0			5.52119	0			2.53055	0
	24.6728	0			1.23652	0.0894454			5.52119	0			2.53055	0.305944
	24.7155	0			1.23866	0.0894454			5.53075	0			2.53493	0.305944
	24.7155	0			1.23866	0			5.53075	0			2.53493	0
	24.7582	0			1.2408	0			5.5403	0			2.5393	0
	24.7582	0			1.2408	0.0894454			5.5403	0			2.5393	0.305944
	24.8009	0			1.24294	0.0894454			5.54985	0			2.54368	0.305944
	24.8009	0			1.24294	0			5.54985	0			2.54368	0
	24.8436	0			1.24507	0			5.5594	0			2.54806	0
	24.8436	0			1.24507	0.0894454			5.5594	0			2.54806	0.305944
	24.8863	0			1.24721	0.0894454			5.56896	0			2.55244	0.305944
	24.8863	0			1.24721	0			5.56896	0			2.55244	0
	24.929	0			1.24935	0			5.57851	0			2.55682	0
	24.929	0			1.24935	0.0894454			5.57851	0			2.55682	0.305944
	24.9716	0			1.25149	0.0894454			5.58806	0			2.56119	0.305944
	24.9716	0			1.25149	0			5.58806	0			2.56119	0
	25.0143	0			1.25363	0			5.59761	0			2.56557	0
	25.0143	0			1.25363	0.0894454			5.59761	0			2.56557	0.305944
	25.057	0			1.25577	0.0894454			5.60716	0			2.56995	0.305944
	25.057	0			1.25577	0			5.60716	0			2.56995	0
	25.0997	0			1.25791	0			5.61672	0			2.57433	0
	25.0997	0			1.25791	0.0894454			5.61672	0			2.57433	0.305944
	25.1424	0			1.26005	0.0894454			5.62627	0			2.57871	0.305944
	25.1424	0			1.26005	0			5.62627	0			2.57871	0
	25.1851	0			1.26219	0			5.63582	0			2.58308	0
	25.1851	0			1.26219	0.0894454			5.63582	0			2.58308	0.305944
	25.2278	0			1.26433	0.0894454			5.64537	0			2.58746	0.305944
	25.2278	0			1.26433	0			5.64537	0			2.58746	0
	25.2704	0			1.26647	0			5.65493	0			2.59184	0
	25.2704	0			1.26647	0.0894454			5.65493	0			2.59184	0.305944
	25.3131	0			1.26861	0.0894454			5.66448	0			2.59622	0.305944
	25.3131	0			1.26861	0			5.66448	0			2.59622	0
	25.3558	0			1.27075	0			5.67403	0			2.6006	0
	25.3558	0			1.27075	0.0894454			5.67403	0			2.6006	0.305944
	25.3985	0			1.27289	0.0894454			5.68358	0			2.60498	0.305944
	25.3985	0			1.27289	0			5.68358	0			2.60498	0
	25.4412	0			1.27502	0			5.69313	0			2.60935	0
	25.4412	0			1.27502	0.0894454			5.69313	0			2.60935	0.305944
	25.4839	0			1.27716	0.0894454			5.70269	0			2.61373	0.305944
	25.4839	0			1.27716	0			5.70269	0			2.61373	0
	25.5266	0			1.2793	0			5.71224	0			2.61811	0
	25.5266	0			1.2793	0.0894454			5.71224	0			2.61811	0.305944
	25.5693	0			1.28144	0.0894454			5.72179	0			2.62249	0.305944
	25.5693	0			1.28144	0			5.72179	0			2.62249	0
	25.6119	0			1.28358	0			5.73134	0			2.62687	0
	25.6119	0			1.28358	0.0894454			5.73134	0			2.62687	0.305944
	25.6546	0			1.28572	0.0894454			5.7409	0			2.63124	0.305944
	25.6546	0			1.28572	0			5.7409	0			2.63124	0
	25.6973	0			1.28786	0			5.75045	0			2.63562	0
	25.6973	0			1.28786	0.0894454			5.75045	0			2.63562	0.305944
	25.74	0			1.29	0.0894454			5.76	0			2.64	0.305944
	25.74	0			1.29	0			5.76	0			2.64	0
	25.7827	0			1.29214	0			5.76955	0			2.64438	0
	25.7827	0			1.29214	0.0894454			5.76955	0			2.64438	0.305944
	25.8254	0			1.29428	0.0894454			5.7791	0			2.64876	0.305944
	25.8254	0			1.29428	0			5.7791	0			2.64876	0
	25.8681	0			1.29642	0			5.78866	0			2.65313	0
	25.8681	0			1.29642	0.0894454			5.78866	0			2.65313	0.305944
	25.9107	0			1.29856	0.0894454			5.79821	0			2.65751	0.305944
	25.9107	0			1.29856	0			5.79821	0			2.65751	0
	25.9534	0			1.3007	0			5.80776	0			2.66189	0
	25.9534	0			1.3007	0.0894454			5.80776	0			2.66189	0.305944
	25.9961	0			1.30284	0.0894454			5.81731	0			2.66627	0.305944
	25.9961	0			1.30284	0			5.81731	0			2.66627	0
	26.0388	0			1.30498	0			5.82687	0			2.67065	0
	26.0388	0			1.30498	0.0894454			5.82687	0			2.67065	0.305944
	26.0815	0			1.30711	0.0894454			5.83642	0			2.67502	0.305944
	26.0815	0			1.30711	0			5.83642	0			2.67502	0
	26.1242	0			1.30925	0			5.84597	0			2.6794	0
	26.1242	0			1.30925	0.0894454			5.84597	0			2.6794	0.305944
	26.1669	0			1.31139	0.0894454			5.85552	0			2.68378	0.305944
	26.1669	0			1.31139	0			5.85552	0			2.68378	0
	26.2096	0			1.31353	0			5.86507	0			2.68816	0
	26.2096	0			1.31353	0.0894454			5.86507	0			2.68816	0.305944
	26.2522	0			1.31567	0.0894454			5.87463	0			2.69254	0.305944
	26.2522	0			1.31567	0			5.87463	0			2.69254	0
	26.2949	0			1.31781	0			5.88418	0			2.69692	0
	26.2949	0			1.31781	0.0894454			5.88418	0			2.69692	0.305944
	26.3376	0			1.31995	0.0894454			5.89373	0			2.70129	0.305944
	26.3376	0			1.31995	0			5.89373	0			2.70129	0
	26.3803	0			1.32209	0			5.90328	0			2.70567	0
	26.3803	0			1.32209	0.0894454			5.90328	0			2.70567	0.305944
	26.423	0			1.32423	0.0894454			5.91284	0			2.71005	0.305944
	26.423	0			1.32423	0			5.91284	0			2.71005	0
	26.4657	0			1.32637	0			5.92239	0			2.71443	0
	26.4657	0			1.32637	0.0894454			5.92239	0			2.71443	0.305944
	26.5084	0			1.32851	0.0894454			5.93194	0			2.71881	0.305944
	26.5084	0			1.32851	0			5.93194	0			2.71881	0
	26.551	0			1.33065	0			5.94149	0			2.72318	0
	26.551	0			1.33065	0.0894454			5.94149	0			2.72318	0.305944
	26.5937	0			1.33279	0.0894454			5.95104	0			2.72756	0.305944
	26.5937	0			1.33279	0			5.95104	0			2.72756	0
	26.6364	0			1.33493	0			5.9606	0			2.73194	0
	26.6364	0			1.33493	0.0894454			5.9606	0			2.73194	0.305944
	26.6791	0			1.33706	0.0894454			5.97015	0			2.73632	0.305944
	26.6791	0			1.33706	0			5.97015	0			2.73632	0
	26.7218	0			1.3392	0			5.9797	0			2.7407	0
	26.7218	0			1.3392	0.0894454			5.9797	0			2.7407	0.305944
	26.7645	0			1.34134	0.0894454			5.98925	0			2.74507	0.305944
	26.7645	0			1.34134	0			5.98925	0			2.74507	0
	26.8072	0			1.34348	0			5.99881	0			2.74945	0
	26.8072	0			1.34348	0.0894454			5.99881	0			2.74945	0.305944
	26.8499	0			1.34562	0.0894454			6.00836	0			2.75383	0.305944
	26.8499	0			1.34562	0			6.00836	0			2.75383	0
	26.8925	0			1.34776	0			6.01791	0			2.75821	0
	26.8925	0			1.34776	0.0894454			6.01791	0			2.75821	0.305944
	26.9352	0			1.3499	0.0894454			6.02746	0			2.76259	0.305944
	26.9352	0			1.3499	0			6.02746	0			2.76259	0
	26.9779	0			1.35204	0			6.03701	0			2.76697	0
	26.9779	0			1.35204	0.0894454			6.03701	0			2.76697	0.305944
	27.0206	0			1.35418	0.0894454			6.04657	0			2.77134	0.305944
	27.0206	0			1.35418	0			6.04657	0			2.77134	0
	27.0633	0			1.35632	0			6.05612	0			2.77572	0
	27.0633	0			1.35632	0.0894454			6.05612	0			2.77572	0.305944
	27.106	0			1.35846	0.0894454			6.06567	0			2.7801	0.305944
	27.106	0			1.35846	0			6.06567	0			2.7801	0
	27.1487	0			1.3606	0			6.07522	0			2.78448	0
	27.1487	0			1.3606	0.0894454			6.07522	0			2.78448	0.305944
	27.1913	0			1.36274	0.0894454			6.08478	0			2.78886	0.305944
	27.1913	0			1.36274	0			6.08478	0			2.78886	0
	27.234	0			1.36488	0			6.09433	0			2.79323	0
	27.234	0			1.36488	0.0894454			6.09433	0			2.79323	0.305944
	27.2767	0			1.36701	0.0894454			6.10388	0			2.79761	0.305944
	27.2767	0			1.36701	0			6.10388	0			2.79761	0
	27.3194	0			1.36915	0			6.11343	0			2.80199	0
	27.3194	0			1.36915	0.0894454			6.11343	0			2.80199	0.305944
	27.3621	0			1.37129	0.0894454			6.12299	0			2.80637	0.305944
	27.3621	0			1.37129	0			6.12299	0			2.80637	0
	27.4048	0			1.37343	0			6.13254	0			2.81075	0
	27.4048	0			1.37343	0.0894454			6.13254	0			2.81075	0.305944
	27.4475	0			1.37557	0.0894454			6.14209	0			2.81512	0.305944
	27.4475	0			1.37557	0			6.14209	0			2.81512	0
	27.4901	0			1.37771	0			6.15164	0			2.8195	0
	27.4901	0			1.37771	0.0894454			6.15164	0			2.8195	0.305944
	27.5328	0			1.37985	0.0894454			6.16119	0			2.82388	0.305944
	27.5328	0			1.37985	0			6.16119	0			2.82388	0
	27.5755	0			1.38199	0			6.17075	0			2.82826	0
	27.5755	0			1.38199	0.0894454			6.17075	0			2.82826	0.305944
	27.6182	0			1.38413	0.0894454			6.1803	0			2.83264	0.305944
	27.6182	0			1.38413	0			6.1803	0			2.83264	0
	27.6609	0			1.38627	0			6.18985	0			2.83701	0
	27.6609	0			1.38627	0.0894454			6.18985	0			2.83701	0.305944
	27.7036	0			1.38841	0.0894454			6.1994	0			2.84139	0.305944
	27.7036	0			1.38841	0			6.1994	0			2.84139	0
	27.7463	0			1.39055	0			6.20896	0			2.84577	0
	27.7463	0			1.39055	0.0894454			6.20896	0			2.84577	0.305944
	27.789	0			1.39269	0.0894454			6.21851	0			2.85015	0.305944
	27.789	0			1.39269	0			6.21851	0			2.85015	0
	27.8316	0			1.39483	0			6.22806	0			2.85453	0
	27.8316	0			1.39483	0.0894454			6.22806	0			2.85453	0.305944
	27.8743	0			1.39697	0.0894454			6.23761	0			2.85891	0.305944
	27.8743	0			1.39697	0			6.23761	0			2.85891	0
	27.917	0			1.3991	0			6.24716	0			2.86328	0
	27.917	0			1.3991	0.0894454			6.24716	0			2.86328	0.305944
	27.9597	0			1.40124	0.0894454			6.25672	0			2.86766	0.305944
	27.9597	0			1.40124	0			6.25672	0			2.86766	0
	28.0024	0			1.40338	0			6.26627	0			2.87204	0
	28.0024	0			1.40338	0.0894454			6.26627	0			2.87204	0.305944
	28.0451	0			1.40552	0.0894454			6.27582	0			2.87642	0.305944
	28.0451	0			1.40552	0			6.27582	0			2.87642	0
	28.0878	0			1.40766	0			6.28537	0			2.8808	0
	28.0878	0			1.40766	0.0894454			6.28537	0			2.8808	0.305944
	28.1304	0			1.4098	0.0894454			6.29493	0			2.88517	0.305944
	28.1304	0			1.4098	0			6.29493	0			2.88517	0
	28.1731	0			1.41194	0			6.30448	0			2.88955	0
	28.1731	0			1.41194	0.0894454			6.30448	0			2.88955	0.305944
	28.2158	0			1.41408	0.0894454			6.31403	0			2.89393	0.305944
	28.2158	0			1.41408	0			6.31403	0			2.89393	0
	28.2585	0			1.41622	0			6.32358	0			2.89831	0
	28.2585	0			1.41622	0.0894454			6.32358	0			2.89831	0.305944
	28.3012	0			1.41836	0.0894454			6.33313	0			2.90269	0.305944
	28.3012	0			1.41836	0			6.33313	0			2.90269	0
	28.3439	0			1.4205	0			6.34269	0			2.90706	0
	28.3439	0			1.4205	0.0894454			6.34269	0			2.90706	0.305944
	28.3866	0			1.42264	0.0894454			6.35224	0			2.91144	0.305944
	28.3866	0			1.42264	0			6.35224	0			2.91144	0
	28.4293	0			1.42478	0			6.36179	0			2.91582	0
	28.4293	0			1.42478	0.0894454			6.36179	0			2.91582	0.305944
	28.4719	0			1.42692	0.0894454			6.37134	0			2.9202	0.305944
	28.4719	0			1.42692	0			6.37134	0			2.9202	0
	28.5146	0			1.42905	0			6.3809	0			2.92458	0
	28.5146	0			1.42905	0.0894454			6.3809	0			2.92458	0.305944
	28.5573	0			1.43119	0.0894454			6.39045	0			2.92896	0.305944
	28.5573	0			1.43119	0			6.39045	0			2.92896	0
	28.6	0			1.43333	0			6.4	0			2.93333	0
	28.6	0			1.43333	0.0894454			6.4	0			2.93333	0.305944
	28.6427	0			1.43547	0.0894454			6.40955	0			2.93771	0.305944
	28.6427	0			1.43547	0			6.40955	0			2.93771	0
	28.6854	0			1.43761	0			6.4191	0			2.94209	0
	28.6854	0			1.43761	0.0894454			6.4191	0			2.94209	0.305944
	28.7281	0			1.43975	0.0894454			6.42866	0			2.94647	0.305944
	28.7281	0			1.43975	0			6.42866	0			2.94647	0
	28.7707	0			1.44189	0			6.43821	0			2.95085	0
	28.7707	0			1.44189	0.0894454			6.43821	0			2.95085	0.305944
	28.8134	0			1.44403	0.0894454			6.44776	0			2.95522	0.305944
	28.8134	0			1.44403	0			6.44776	0			2.95522	0
	28.8561	0			1.44617	0			6.45731	0			2.9596	0
	28.8561	0			1.44617	0.0894454			6.45731	0			2.9596	0.305944
	28.8988	0			1.44831	0.0894454			6.46687	0			2.96398	0.305944
	28.8988	0			1.44831	0			6.46687	0			2.96398	0
	28.9415	0			1.45045	0			6.47642	0			2.96836	0
	28.9415	0			1.45045	0.0894454			6.47642	0			2.96836	0.305944
	28.9842	0			1.45259	0.0894454			6.48597	0			2.97274	0.305944
	28.9842	0			1.45259	0			6.48597	0			2.97274	0
	29.0269	0			1.45473	0			6.49552	0			2.97711	0
	29.0269	0			1.45473	0.0894454			6.49552	0			2.97711	0.305944
	29.0696	0			1.45687	0.0894454			6.50507	0			2.98149	0.305944
	29.0696	0			1.45687	0			6.50507	0			2.98149	0
	29.1122	0			1.459	0			6.51463	0			2.98587	0
	29.1122	0			1.459	0.0894454			6.51463	0			2.98587	0.305944
	29.1549	0			1.46114	0.0894454			6.52418	0			2.99025	0.305944
	29.1549	0			1.46114	0			6.52418	0			2.99025	0
	29.1976	0			1.46328	0			6.53373	0			2.99463	0
	29.1976	0			1.46328	0.0894454			6.53373	0			2.99463	0.305944
	29.2403	0			1.46542	0.0894454			6.54328	0			2.999	0.305944
	29.2403	0			1.46542	0			6.54328	0			2.999	0
	29.283	0			1.46756	0			6.55284	0			3.00338	0
	29.283	0			1.46756	0.0894454			6.55284	0			3.00338	0.305944
	29.3257	0			1.4697	0.0894454			6.56239	0			3.00776	0.305944
	29.3257	0			1.4697	0			6.56239	0			3.00776	0
	29.3684	0			1.47184	0			6.57194	0			3.01214	0
	29.3684	0			1.47184	0.0894454			6.57194	0			3.01214	0.305944
	29.411	0			1.47398	0.0894454			6.58149	0			3.01652	0.305944
	29.411	0			1.47398	0			6.58149	0			3.01652	0
	29.4537	0			1.47612	0			6.59104	0			3.0209	0
	29.4537	0			1.47612	0.0894454			6.59104	0			3.0209	0.305944
	29.4964	0			1.47826	0.0894454			6.6006	0			3.02527	0.305944
	29.4964	0			1.47826	0			6.6006	0			3.02527	0
	29.5391	0			1.4804	0			6.61015	0			3.02965	0
	29.5391	0			1.4804	0.0894454			6.61015	0			3.02965	0.305944
	29.5818	0			1.48254	0.0894454			6.6197	0			3.03403	0.305944
	29.5818	0			1.48254	0			6.6197	0			3.03403	0
	29.6245	0			1.48468	0			6.62925	0			3.03841	0
	29.6245	0			1.48468	0.0894454			6.62925	0			3.03841	0.305944
	29.6672	0			1.48682	0.0894454			6.63881	0			3.04279	0.305944
	29.6672	0			1.48682	0			6.63881	0			3.04279	0
	29.7099	0			1.48896	0			6.64836	0			3.04716	0
	29.7099	0			1.48896	0.0894454			6.64836	0			3.04716	0.305944
	29.7525	0			1.49109	0.0894454			6.65791	0			3.05154	0.305944
	29.7525	0			1.49109	0			6.65791	0			3.05154	0
	29.7952	0			1.49323	0			6.66746	0			3.05592	0
	29.7952	0			1.49323	0.0894454			6.66746	0			3.05592	0.305944
	29.8379	0			1.49537	0.0894454			6.67701	0			3.0603	0.305944
	29.8379	0			1.49537	0			6.67701	0			3.0603	0
	29.8806	0			1.49751	0			6.68657	0			3.06468	0
	29.8806	0			1.49751	0.0894454			6.68657	0			3.06468	0.305944
	29.9233	0			1.49965	0.0894454			6.69612	0			3.06905	0.305944
	29.9233	0			1.49965	0			6.69612	0			3.06905	0
	29.966	0			1.50179	0			6.70567	0			3.07343	0
	29.966	0			1.50179	0.0894454			6.70567	0			3.07343	0.305944
	30.0087	0			1.50393	0.0894454			6.71522	0			3.07781	0.305944
	30.0087	0			1.50393	0			6.71522	0			3.07781	0
	30.0513	0			1.50607	0			6.72478	0			3.08219	0
	30.0513	0			1.50607	0.0894454			6.72478	0			3.08219	0.305944
	30.094	0			1.50821	0.0894454			6.73433	0			3.08657	0.305944
	30.094	0			1.50821	0			6.73433	0			3.08657	0
	30.1367	0			1.51035	0			6.74388	0			3.09095	0
	30.1367	0			1.51035	0.0894454			6.74388	0			3.09095	0.305944
	30.1794	0			1.51249	0.0894454			6.75343	0			3.09532	0.305944
	30.1794	0			1.51249	0			6.75343	0			3.09532	0
	30.2221	0			1.51463	0			6.76299	0			3.0997	0
	30.2221	0			1.51463	0.0894454			6.76299	0			3.0997	0.305944
	30.2648	0			1.51677	0.0894454			6.77254	0			3.10408	0.305944
	30.2648	0			1.51677	0			6.77254	0			3.10408	0
	30.3075	0			1.51891	0			6.78209	0			3.10846	0
	30.3075	0			1.51891	0.0894454			6.78209	0			3.10846	0.305944
	30.3501	0			1.52104	0.0894454			6.79164	0			3.11284	0.305944
	30.3501	0			1.52104	0			6.79164	0			3.11284	0
	30.3928	0			1.52318	0			6.80119	0			3.11721	0
	30.3928	0			1.52318	0.0894454			6.80119	0			3.11721	0.305944
	30.4355	0			1.52532	0.0894454			6.81075	0			3.12159	0.305944
	30.4355	0			1.52532	0			6.81075	0			3.12159	0
	30.4782	0			1.52746	0			6.8203	0			3.12597	0
	30.4782	0			1.52746	0.0894454			6.8203	0			3.12597	0.305944
	30.5209	0			1.5296	0.0894454			6.82985	0			3.13035	0.305944
	30.5209	0			1.5296	0			6.82985	0			3.13035	0
	30.5636	0			1.53174	0			6.8394	0			3.13473	0
	30.5636	0			1.53174	0.0894454			6.8394	0			3.13473	0.305944
	30.6063	0			1.53388	0.0894454			6.84896	0			3.1391	0.305944
	30.6063	0			1.53388	0			6.84896	0			3.1391	0
	30.649	0			1.53602	0			6.85851	0			3.14348	0
	30.649	0			1.53602	0.0894454			6.85851	0			3.14348	0.305944
	30.6916	0			1.53816	0.0894454			6.86806	0			3.14786	0.305944
	30.6916	0			1.53816	0			6.86806	0			3.14786	0
	30.7343	0			1.5403	0			6.87761	0			3.15224	0
	30.7343	0			1.5403	0.0894454			6.87761	0			3.15224	0.305944
	30.777	0			1.54244	0.0894454			6.88716	0			3.15662	0.305944
	30.777	0			1.54244	0			6.88716	0			3.15662	0
	30.8197	0			1.54458	0			6.89672	0			3.161	0
	30.8197	0			1.54458	0.0894454			6.89672	0			3.161	0.305944
	30.8624	0			1.54672	0.0894454			6.90627	0			3.16537	0.305944
	30.8624	0			1.54672	0			6.90627	0			3.16537	0
	30.9051	0			1.54886	0			6.91582	0			3.16975	0
	30.9051	0			1.54886	0.0894454			6.91582	0			3.16975	0.305944
	30.9478	0			1.551	0.0894454			6.92537	0			3.17413	0.305944
	30.9478	0			1.551	0			6.92537	0			3.17413	0
	30.9904	0			1.55313	0			6.93493	0			3.17851	0
	30.9904	0			1.55313	0.0894454			6.93493	0			3.17851	0.305944
	31.0331	0			1.55527	0.0894454			6.94448	0			3.18289	0.305944
	31.0331	0			1.55527	0			6.94448	0			3.18289	0
	31.0758	0			1.55741	0			6.95403	0			3.18726	0
	31.0758	0			1.55741	0.0894454			6.95403	0			3.18726	0.305944
	31.1185	0			1.55955	0.0894454			6.96358	0			3.19164	0.305944
	31.1185	0			1.55955	0			6.96358	0			3.19164	0
	31.1612	0			1.56169	0			6.97313	0			3.19602	0
	31.1612	0			1.56169	0.0894454			6.97313	0			3.19602	0.305944
	31.2039	0			1.56383	0.0894454			6.98269	0			3.2004	0.305944
	31.2039	0			1.56383	0			6.98269	0			3.2004	0
	31.2466	0			1.56597	0			6.99224	0			3.20478	0
	31.2466	0			1.56597	0.0894454			6.99224	0			3.20478	0.305944
	31.2893	0			1.56811	0.0894454			7.00179	0			3.20915	0.305944
	31.2893	0			1.56811	0			7.00179	0			3.20915	0
	31.3319	0			1.57025	0			7.01134	0			3.21353	0
	31.3319	0			1.57025	0.0894454			7.01134	0			3.21353	0.305944
	31.3746	0			1.57239	0.0894454			7.0209	0			3.21791	0.305944
	31.3746	0			1.57239	0			7.0209	0			3.21791	0
	31.4173	0			1.57453	0			7.03045	0			3.22229	0
	31.4173	0			1.57453	0.0894454			7.03045	0			3.22229	0.305944
	31.46	0			1.57667	0.0894454			7.04	0			3.22667	0.305944
	31.46	0			1.57667	0			7.04	0			3.22667	0
	31.5027	0			1.57881	0			7.04955	0			3.23104	0
	31.5027	0			1.57881	0.0894454			7.04955	0			3.23104	0.305944
	31.5454	0			1.58095	0.0894454			7.0591	0			3.23542	0.305944
	31.5454	0			1.58095	0			7.0591	0			3.23542	0
	31.5881	0			1.58308	0			7.06866	0			3.2398	0
	31.5881	0			1.58308	0.0894454			7.06866	0			3.2398	0.305944
	31.6307	0			1.58522	0.0894454			7.07821	0			3.24418	0.305944
	31.6307	0			1.58522	0			7.07821	0			3.24418	0
	31.6734	0			1.58736	0			7.08776	0			3.24856	0
	31.6734	0			1.58736	0.0894454			7.08776	0			3.24856	0.305944
	31.7161	0			1.5895	0.0894454			7.09731	0			3.25294	0.305944
	31.7161	0			1.5895	0			7.09731	0			3.25294	0
	31.7588	0			1.59164	0			7.10687	0			3.25731	0
	31.7588	0			1.59164	0.0894454			7.10687	0			3.25731	0.305944
	31.8015	0			1.59378	0.0894454			7.11642	0			3.26169	0.305944
	31.8015	0			1.59378	0			7.11642	0			3.26169	0
	31.8442	0			1.59592	0			7.12597	0			3.26607	0
	31.8442	0			1.59592	0.0894454			7.12597	0			3.26607	0.305944
	31.8869	0			1.59806	0.0894454			7.13552	0			3.27045	0.305944
	31.8869	0			1.59806	0			7.13552	0			3.27045	0
	31.9296	0			1.6002	0			7.14507	0			3.27483	0
	31.9296	0			1.6002	0.0894454			7.14507	0			3.27483	0.305944
	31.9722	0			1.60234	0.0894454			7.15463	0			3.2792	0.305944
	31.9722	0			1.60234	0			7.15463	0			3.2792	0
	32.0149	0			1.60448	0			7.16418	0			3.28358	0
	32.0149	0			1.60448	0.0894454			7.16418	0			3.28358	0.305944
	32.0576	0			1.60662	0.0894454			7.17373	0			3.28796	0.305944
	32.0576	0			1.60662	0			7.17373	0			3.28796	0
	32.1003	0			1.60876	0			7.18328	0			3.29234	0
	32.1003	0			1.60876	0.0894454			7.18328	0			3.29234	0.305944
	32.143	0			1.6109	0.0894454			7.19284	0			3.29672	0.305944
	32.143	0			1.6109	0			7.19284	0			3.29672	0
	32.1857	0			1.61303	0			7.20239	0			3.30109	0
	32.1857	0			1.61303	0.0894454			7.20239	0			3.30109	0.305944
	32.2284	0			1.61517	0.0894454			7.21194	0			3.30547	0.305944
	32.2284	0			1.61517	0			7.21194	0			3.30547	0
	32.271	0			1.61731	0			7.22149	0			3.30985	0
	32.271	0			1.61731	0.0894454			7.22149	0			3.30985	0.305944
	32.3137	0			1.61945	0.0894454			7.23104	0			3.31423	0.305944
	32.3137	0			1.61945	0			7.23104	0			3.31423	0
	32.3564	0			1.62159	0			7.2406	0			3.31861	0
	32.3564	0			1.62159	0.0894454			7.2406	0			3.31861	0.305944
	32.3991	0			1.62373	0.0894454			7.25015	0			3.32299	0.305944
	32.3991	0			1.62373	0			7.25015	0			3.32299	0
	32.4418	0			1.62587	0			7.2597	0			3.32736	0
	32.4418	0			1.62587	0.0894454			7.2597	0			3.32736	0.305944
	32.4845	0			1.62801	0.0894454			7.26925	0			3.33174	0.305944
	32.4845	0			1.62801	0			7.26925	0			3.33174	0
	32.5272	0			1.63015	0			7.27881	0			3.33612	0
	32.5272	0			1.63015	0.0894454			7.27881	0			3.33612	0.305944
	32.5699	0			1.63229	0.0894454			7.28836	0			3.3405	0.305944
	32.5699	0			1.63229	0			7.28836	0			3.3405	0
	32.6125	0			1.63443	0			7.29791	0			3.34488	0
	32.6125	0			1.63443	0.0894454			7.29791	0			3.34488	0.305944
	32.6552	0			1.63657	0.0894454			7.30746	0			3.34925	0.305944
	32.6552	0			1.63657	0			7.30746	0			3.34925	0
	32.6979	0			1.63871	0			7.31701	0			3.35363	0
	32.6979	0			1.63871	0.0894454			7.31701	0			3.35363	0.305944
	32.7406	0			1.64085	0.0894454			7.32657	0			3.35801	0.305944
	32.7406	0			1.64085	0			7.32657	0			3.35801	0
	32.7833	0			1.64299	0			7.33612	0			3.36239	0
	32.7833	0			1.64299	0.0894454			7.33612	0			3.36239	0.305944
	32.826	0			1.64512	0.0894454			7.34567	0			3.36677	0.305944
	32.826	0			1.64512	0			7.34567	0			3.36677	0
	32.8687	0			1.64726	0			7.35522	0			3.37114	0
	32.8687	0			1.64726	0.0894454			7.35522	0			3.37114	0.305944
	32.9113	0			1.6494	0.0894454			7.36478	0			3.37552	0.305944
	32.9113	0			1.6494	0			7.36478	0			3.37552	0
	32.954	0			1.65154	0			7.37433	0			3.3799	0
	32.954	0			1.65154	0.0894454			7.37433	0			3.3799	0.305944
	32.9967	0			1.65368	0.0894454			7.38388	0			3.38428	0.305944
	32.9967	0			1.65368	0			7.38388	0			3.38428	0
	33.0394	0			1.65582	0			7.39343	0			3.38866	0
	33.0394	0			1.65582	0.0894454			7.39343	0			3.38866	0.305944
	33.0821	0			1.65796	0.0894454			7.40299	0			3.39303	0.305944
	33.0821	0			1.65796	0			7.40299	0			3.39303	0
	33.1248	0			1.6601	0			7.41254	0			3.39741	0
	33.1248	0			1.6601	0.0894454			7.41254	0			3.39741	0.305944
	33.1675	0			1.66224	0.0894454			7.42209	0			3.40179	0.305944
	33.1675	0			1.66224	0			7.42209	0			3.40179	0
	33.2101	0			1.66438	0			7.43164	0			3.40617	0
	33.2101	0			1.66438	0.0894454			7.43164	0			3.40617	0.305944
	33.2528	0			1.66652	0.0894454			7.44119	0			3.41055	0.305944
	33.2528	0			1.66652	0			7.44119	0			3.41055	0
	33.2955	0			1.66866	0			7.45075	0			3.41493	0
	33.2955	0			1.66866	0.0894454			7.45075	0			3.41493	0.305944
	33.3382	0			1.6708	0.0894454			7.4603	0			3.4193	0.305944
	33.3382	0			1.6708	0			7.4603	0			3.4193	0
	33.3809	0			1.67294	0			7.46985	0			3.42368	0
	33.3809	0			1.67294	0.0894454			7.46985	0			3.42368	0.305944
	33.4236	0			1.67507	0.0894454			7.4794	0			3.42806	0.305944
	33.4236	0			1.67507	0			7.4794	0			3.42806	0
	33.4663	0			1.67721	0			7.48896	0			3.43244	0
	33.4663	0			1.67721	0.0894454			7.48896	0			3.43244	0.305944
	33.509	0			1.67935	0.0894454			7.49851	0			3.43682	0.305944
	33.509	0			1.67935	0			7.49851	0			3.43682	0
	33.5516	0			1.68149	0			7.50806	0			3.44119	0
	33.5516	0			1.68149	0.0894454			7.50806	0			3.44119	0.305944
	33.5943	0			1.68363	0.0894454			7.51761	0			3.44557	0.305944
	33.5943	0			1.68363	0			7.51761	0			3.44557	0
	33.637	0			1.68577	0			7.52716	0			3.44995	0
	33.637	0			1.68577	0.0894454			7.52716	0			3.44995	0.305944
	33.6797	0			1.68791	0.0894454			7.53672	0			3.45433	0.305944
	33.6797	0			1.68791	0			7.53672	0			3.45433	0
	33.7224	0			1.69005	0			7.54627	0			3.45871	0
	33.7224	0			1.69005	0.0894454			7.54627	0			3.45871	0.305944
	33.7651	0			1.69219	0.0894454			7.55582	0			3.46308	0.305944
	33.7651	0			1.69219	0			7.55582	0			3.46308	0
	33.8078	0			1.69433	0			7.56537	0			3.46746	0
	33.8078	0			1.69433	0.0894454			7.56537	0			3.46746	0.305944
	33.8504	0			1.69647	0.0894454			7.57493	0			3.47184	0.305944
	33.8504	0			1.69647	0			7.57493	0			3.47184	0
	33.8931	0			1.69861	0			7.58448	0			3.47622	0
	33.8931	0			1.69861	0.0894454			7.58448	0			3.47622	0.305944
	33.9358	0			1.70075	0.0894454			7.59403	0			3.4806	0.305944
	33.9358	0			1.70075	0			7.59403	0			3.4806	0
	33.9785	0			1.70289	0			7.60358	0			3.48498	0
	33.9785	0			1.70289	0.0894454			7.60358	0			3.48498	0.305944
	34.0212	0			1.70502	0.0894454			7.61313	0			3.48935	0.305944
	34.0212	0			1.70502	0			7.61313	0			3.48935	0
	34.0639	0			1.70716	0			7.62269	0			3.49373	0
	34.0639	0			1.70716	0.0894454			7.62269	0			3.49373	0.305944
	34.1066	0			1.7093	0.0894454			7.63224	0			3.49811	0.305944
	34.1066	0			1.7093	0			7.63224	0			3.49811	0
	34.1493	0			1.71144	0			7.64179	0			3.50249	0
	34.1493	0			1.71144	0.0894454			7.64179	0			3.50249	0.305944
	34.1919	0			1.71358	0.0894454			7.65134	0			3.50687	0.305944
	34.1919	0			1.71358	0			7.65134	0			3.50687	0
	34.2346	0			1.71572	0			7.6609	0			3.51124	0
	34.2346	0			1.71572	0.0894454			7.6609	0			3.51124	0.305944
	34.2773	0			1.71786	0.0894454			7.67045	0			3.51562	0.305944
	34.2773	0			1.71786	0			7.67045	0			3.51562	0
	34.32	0			1.72	0			7.68	0			3.52	0
	34.32	0.00896539			1.72	0.268336			7.68	0.0200321			3.52	0
	34.3627	0.00896539			1.72214	0.268336			7.68955	0.0200321			3.52438	0
	34.3627	0			1.72214	0			7.68955	0			3.52438	0
	34.4054	0			1.72428	0			7.6991	0			3.52876	0
	34.4054	0.00896539			1.72428	0.268336			7.6991	0.0200321			3.52876	0
	34.4481	0.00896539			1.72642	0.268336			7.70866	0.0200321			3.53313	0
	34.4481	0			1.72642	0			7.70866	0			3.53313	0
	34.4907	0			1.72856	0			7.71821	0			3.53751	0
	34.4907	0.00896539			1.72856	0.268336			7.71821	0.0200321			3.53751	0
	34.5334	0.00896539			1.7307	0.268336			7.72776	0.0200321			3.54189	0
	34.5334	0			1.7307	0			7.72776	0			3.54189	0
	34.5761	0			1.73284	0			7.73731	0			3.54627	0
	34.5761	0.00896539			1.73284	0.268336			7.73731	0.0200321			3.54627	0
	34.6188	0.00896539			1.73498	0.268336			7.74687	0.0200321			3.55065	0
	34.6188	0			1.73498	0			7.74687	0			3.55065	0
	34.6615	0			1.73711	0			7.75642	0			3.55502	0
	34.6615	0.00896539			1.73711	0.268336			7.75642	0.0200321			3.55502	0
	34.7042	0.00896539			1.73925	0.268336			7.76597	0.0200321			3.5594	0
	34.7042	0			1.73925	0			7.76597	0			3.5594	0
	34.7469	0			1.74139	0			7.77552	0			3.56378	0
	34.7469	0.00896539			1.74139	0.268336			7.77552	0.0200321			3.56378	0
	34.7896	0.00896539			1.74353	0.268336			7.78507	0.0200321			3.56816	0
	34.7896	0			1.74353	0			7.78507	0			3.56816	0
	34.8322	0			1.74567	0			7.79463	0			3.57254	0
	34.8322	0.00896539			1.74567	0.268336			7.79463	0.0200321			3.57254	0
	34.8749	0.00896539			1.74781	0.268336			7.80418	0.0200321			3.57692	0
	34.8749	0			1.74781	0			7.80418	0			3.57692	0
	34.9176	0			1.74995	0			7.81373	0			3.58129	0
	34.9176	0.00896539			1.74995	0.268336			7.81373	0.0200321			3.58129	0
	34.9603	0.00896539			1.75209	0.268336			7.82328	0.0200321			3.58567	0
	34.9603	0			1.75209	0			7.82328	0			3.58567	0
	35.003	0			1.75423	0			7.83284	0			3.59005	0
	35.003	0.00896539			1.75423	0.268336			7.83284	0.0200321			3.59005	0
	35.0457	0.00896539			1.75637	0.268336			7.84239	0.0200321			3.59443	0
	35.0457	0			1.75637	0			7.84239	0			3.59443	0
	35.0884	0			1.75851	0			7.85194	0			3.59881	0
	35.0884	0.00896539			1.75851	0.268336			7.85194	0.0200321			3.59881	0
	35.131	0.00896539			1.76065	0.268336			7.86149	0.0200321			3.60318	0
	35.131	0			1.76065	0			7.86149	0			3.60318	0
	35.1737	0			1.76279	0			7.87104	0			3.60756	0
	35.1737	0.00896539			1.76279	0.268336			7.87104	0.0200321			3.60756	0
	35.2164	0.00896539			1.76493	0.268336			7.8806	0.0200321			3.61194	0
	35.2164	0			1.76493	0			7.8806	0			3.61194	0
	35.2591	0			1.76706	0			7.89015	0			3.61632	0
	35.2591	0.00896539			1.76706	0.268336			7.89015	0.0200321			3.61632	0
	35.3018	0.00896539			1.7692	0.268336			7.8997	0.0200321			3.6207	0
	35.3018	0			1.7692	0			7.8997	0			3.6207	0
	35.3445	0			1.77134	0			7.90925	0			3.62507	0
	35.3445	0.00896539			1.77134	0.268336			7.90925	0.0200321			3.62507	0
	35.3872	0.00896539			1.77348	0.268336			7.91881	0.0200321			3.62945	0
	35.3872	0			1.77348	0			7.91881	0			3.62945	0
	35.4299	0			1.77562	0			7.92836	0			3.63383	0
	35.4299	0.00896539			1.77562	0.268336			7.92836	0.0200321			3.63383	0
	35.4725	0.00896539			1.77776	0.268336			7.93791	0.0200321			3.63821	0
	35.4725	0			1.77776	0			7.93791	0			3.63821	0
	35.5152	0			1.7799	0			7.94746	0			3.64259	0
	35.5152	0.00896539			1.7799	0.268336			7.94746	0.0200321			3.64259	0
	35.5579	0.00896539			1.78204	0.268336			7.95701	0.0200321			3.64697	0
	35.5579	0			1.78204	0			7.95701	0			3.64697	0
	35.6006	0			1.78418	0			7.96657	0			3.65134	0
	35.6006	0.00896539			1.78418	0.268336			7.96657	0.0200321			3.65134	0
	35.6433	0.00896539			1.78632	0.268336			7.97612	0.0200321			3.65572	0
	35.6433	0			1.78632	0			7.97612	0			3.65572	0
	35.686	0			1.78846	0			7.98567	0			3.6601	0
	35.686	0.00896539			1.78846	0.268336			7.98567	0.0200321			3.6601	0
	35.7287	0.00896539			1.7906	0.268336			7.99522	0.0200321			3.66448	0
	35.7287	0			1.7906	0			7.99522	0			3.66448	0
	35.7713	0			1.79274	0			8.00478	0			3.66886	0
	35.7713	0.00896539			1.79274	0.268336			8.00478	0.0200321			3.66886	0
	35.814	0.00896539			1.79488	0.268336			8.01433	0.0200321			3.67323	0
	35.814	0			1.79488	0			8.01433	0			3.67323	0
	35.8567	0			1.79701	0			8.02388	0			3.67761	0
	35.8567	0.00896539			1.79701	0.268336			8.02388	0.0200321			3.67761	0
	35.8994	0.00896539			1.79915	0.268336			8.03343	0.0200321			3.68199	0
	35.8994	0			1.79915	0			8.03343	0			3.68199	0
	35.9421	0			1.80129	0			8.04299	0			3.68637	0
	35.9421	0.00896539			1.80129	0.268336			8.04299	0.0200321			3.68637	0
	35.9848	0.00896539			1.80343	0.268336			8.05254	0.0200321			3.69075	0
	35.9848	0			1.80343	0			8.05254	0			3.69075	0
	36.0275	0			1.80557	0			8.06209	0			3.69512	0
	36.0275	0.00896539			1.80557	0.268336			8.06209	0.0200321			3.69512	0
	36.0701	0.00896539			1.80771	0.268336			8.07164	0.0200321			3.6995	0
	36.0701	0			1.80771	0			8.07164	0			3.6995	0
	36.1128	0			1.80985	0			8.08119	0			3.70388	0
	36.1128	0.00896539			1.80985	0.268336			8.08119	0.0200321			3.70388	0
	36.1555	0.00896539			1.81199	0.268336			8.09075	0.0200321			3.70826	0
	36.1555	0			1.81199	0			8.09075	0			3.70826	0
	36.1982	0			1.81413	0			8.1003	0			3.71264	0
	36.1982	0.00896539			1.81413	0.268336			8.1003	0.0200321			3.71264	0
	36.2409	0.00896539			1.81627	0.268336			8.10985	0.0200321			3.71701	0
	36.2409	0			1.81627	0			8.10985	0			3.71701	0
	36.2836	0			1.81841	0			8.1194	0			3.72139	0
	36.2836	0.00896539			1.81841	0.268336			8.1194	0.0200321			3.72139	0
	36.3263	0.00896539			1.82055	0.268336			8.12896	0.0200321			3.72577	0
	36.3263	0			1.82055	0			8.12896	0			3.72577	0
	36.369	0			1.82269	0			8.13851	0			3.73015	0
	36.369	0.00896539			1.82269	0.268336			8.13851	0.0200321			3.73015	0
	36.4116	0.00896539			1.82483	0.268336			8.14806	0.0200321			3.73453	0
	36.4116	0			1.82483	0			8.14806	0			3.73453	0
	36.4543	0			1.82697	0			8.15761	0			3.73891	0
	36.4543	0.00896539			1.82697	0.268336			8.15761	0.0200321			3.73891	0
	36.497	0.00896539			1.8291	0.268336			8.16716	0.0200321			3.74328	0
	36.497	0			1.8291	0			8.16716	0			3.74328	0
	36.5397	0			1.83124	0			8.17672	0			3.74766	0
	36.5397	0.00896539			1.83124	0.268336			8.17672	0.0200321			3.74766	0
	36.5824	0.00896539			1.83338	0.268336			8.18627	0.0200321			3.75204	0
	36.5824	0			1.83338	0			8.18627	0			3.75204	0
	36.6251	0			1.83552	0			8.19582	0			3.75642	0
	36.6251	0.00896539			1.83552	0.268336			8.19582	0.0200321			3.75642	0
	36.6678	0.00896539			1.83766	0.268336			8.20537	0.0200321			3.7608	0
	36.6678	0			1.83766	0			8.20537	0			3.7608	0
	36.7104	0			1.8398	0			8.21493	0			3.76517	0
	36.7104	0.00896539			1.8398	0.268336			8.21493	0.0200321			3.76517	0
	36.7531	0.00896539			1.84194	0.268336			8.22448	0.0200321			3.76955	0
	36.7531	0			1.84194	0			8.22448	0			3.76955	0
	36.7958	0			1.84408	0			8.23403	0			3.77393	0
	36.7958	0.00896539			1.84408	0.268336			8.23403	0.0200321			3.77393	0
	36.8385	0.00896539			1.84622	0.268336			8.24358	0.0200321			3.77831	0
	36.8385	0			1.84622	0			8.24358	0			3.77831	0
	36.8812	0			1.84836	0			8.25313	0			3.78269	0
	36.8812	0.00896539			1.84836	0.268336			8.25313	0.0200321			3.78269	0
	36.9239	0.00896539			1.8505	0.268336			8.26269	0.0200321			3.78706	0
	36.9239	0			1.8505	0			8.26269	0			3.78706	0
	36.9666	0			1.85264	0			8.27224	0			3.79144	0
	36.9666	0.00896539			1.85264	0.268336			8.27224	0.0200321			3.79144	0
	37.0093	0.00896539			1.85478	0.268336			8.28179	0.0200321			3.79582	0
	37.0093	0			1.85478	0			8.28179	0			3.79582	0
	37.0519	0			1.85692	0			8.29134	0			3.8002	0
	37.0519	0.00896539			1.85692	0.268336			8.29134	0.0200321			3.8002	0
	37.0946	0.00896539			1.85905	0.268336			8.3009	0.0200321			3.80458	0
	37.0946	0			1.85905	0			8.3009	0			3.80458	0
	37.1373	0			1.86119	0			8.31045	0			3.80896	0
	37.1373	0.00896539			1.86119	0.268336			8.31045	0.0200321			3.80896	0
	37.18	0.00896539			1.86333	0.268336			8.32	0.0200321			3.81333	0
	37.18	0			1.86333	0			8.32	0			3.81333	0
	37.2227	0			1.86547	0			8.32955	0			3.81771	0
	37.2227	0.00896539			1.86547	0.268336			8.32955	0.0200321			3.81771	0
	37.2654	0.00896539			1.86761	0.268336			8.3391	0.0200321			3.82209	0
	37.2654	0			1.86761	0			8.3391	0			3.82209	0
	37.3081	0			1.86975	0			8.34866	0			3.82647	0
	37.3081	0.00896539			1.86975	0.268336			8.34866	0.0200321			3.82647	0
	37.3507	0.00896539			1.87189	0.268336			8.35821	0.0200321			3.83085	0
	37.3507	0			1.87189	0			8.35821	0			3.83085	0
	37.3934	0			1.87403	0			8.36776	0			3.83522	0
	37.3934	0.00896539			1.87403	0.268336			8.36776	0.0200321			3.83522	0
	37.4361	0.00896539			1.87617	0.268336			8.37731	0.0200321			3.8396	0
	37.4361	0			1.87617	0			8.37731	0			3.8396	0
	37.4788	0			1.87831	0			8.38687	0			3.84398	0
	37.4788	0.00896539			1.87831	0.268336			8.38687	0.0200321			3.84398	0
	37.5215	0.00896539			1.88045	0.268336			8.39642	0.0200321			3.84836	0
	37.5215	0			1.88045	0			8.39642	0			3.84836	0
	37.5642	0			1.88259	0			8.40597	0			3.85274	0
	37.5642	0.00896539			1.88259	0.268336			8.40597	0.0200321			3.85274	0
	37.6069	0.00896539			1.88473	0.268336			8.41552	0.0200321			3.85711	0
	37.6069	0			1.88473	0			8.41552	0			3.85711	0
	37.6496	0			1.88687	0			8.42507	0			3.86149	0
	37.6496	0.00896539			1.88687	0.268336			8.42507	0.0200321			3.86149	0
	37.6922	0.00896539			1.889	0.268336			8.43463	0.0200321			3.86587	0
	37.6922	0			1.889	0			8.43463	0			3.86587	0
	37.7349	0			1.89114	0			8.44418	0			3.87025	0
	37.7349	0.00896539			1.89114	0.268336			8.44418	0.0200321			3.87025	0
	37.7776	0.00896539			1.89328	0.268336			8.45373	0.0200321			3.87463	0
	37.7776	0			1.89328	0			8.45373	0			3.87463	0
	37.8203	0			1.89542	0			8.46328	0			3.879	0
	37.8203	0.00896539			1.89542	0.268336			8.46328	0.0200321			3.879	0
	37.863	0.00896539			1.89756	0.268336			8.47284	0.0200321			3.88338	0
	37.863	0			1.89756	0			8.47284	0			3.88338	0
	37.9057	0			1.8997	0			8.48239	0			3.88776	0
	37.9057	0.00896539			1.8997	0.268336			8.48239	0.0200321			3.88776	0
	37.9484	0.00896539			1.90184	0.268336			8.49194	0.0200321			3.89214	0
	37.9484	0			1.90184	0			8.49194	0			3.89214	0
	37.991	0			1.90398	0			8.50149	0			3.89652	0
	37.991	0.00896539			1.90398	0.268336			8.50149	0.0200321			3.89652	0
	38.0337	0.00896539			1.90612	0.268336			8.51104	0.0200321			3.9009	0
	38.0337	0			1.90612	0			8.51104	0			3.9009	0
	38.0764	0			1.90826	0			8.5206	0			3.90527	0
	38.0764	0.00896539			1.90826	0.268336			8.5206	0.0200321			3.90527	0
	38.1191	0.00896539			1.9104	0.268336			8.53015	0.0200321			3.90965	0
	38.1191	0			1.9104	0			8.53015	0			3.90965	0
	38.1618	0			1.91254	0			8.5397	0			3.91403	0
	38.1618	0.00896539			1.91254	0.268336			8.5397	0.0200321			3.91403	0
	38.2045	0.00896539			1.91468	0.268336			8.54925	0.0200321			3.91841	0
	38.2045	0			1.91468	0			8.54925	0			3.91841	0
	38.2472	0			1.91682	0			8.55881	0			3.92279	0
	38.2472	0.00896539			1.91682	0.268336			8.55881	0.0200321			3.92279	0
	38.2899	0.00896539			1.91896	0.268336			8.56836	0.0200321			3.92716	0
	38.2899	0			1.91896	0			8.56836	0			3.92716	0
	38.3325	0			1.92109	0			8.57791	0			3.93154	0
	38.3325	0.00896539			1.92109	0.268336			8.57791	0.0200321			3.93154	0
	38.3752	0.00896539			1.92323	0.268336			8.58746	0.0200321			3.93592	0
	38.3752	0			1.92323	0			8.58746	0			3.93592	0
	38.4179	0			1.92537	0			8.59701	0			3.9403	0
	38.4179	0.00896539			1.92537	0.268336			8.59701	0.0200321			3.9403	0
	38.4606	0.00896539			1.92751	0.268336			8.60657	0.0200321			3.94468	0
	38.4606	0			1.92751	0			8.60657	0			3.94468	0
	38.5033	0			1.92965	0			8.61612	0			3.94905	0
	38.5033	0.00896539			1.92965	0.268336			8.61612	0.0200321			3.94905	0
	38.546	0.00896539			1.93179	0.268336			8.62567	0.0200321			3.95343	0
	38.546	0			1.93179	0			8.62567	0			3.95343	0
	38.5887	0			1.93393	0			8.63522	0			3.95781	0
	38.5887	0.00896539			1.93393	0.268336			8.63522	0.0200321			3.95781	0
	38.6313	0.00896539			1.93607	0.268336			8.64478	0.0200321			3.96219	0
	38.6313	0			1.93607	0			8.64478	0			3.96219	0
	38.674	0			1.93821	0			8.65433	0			3.96657	0
	38.674	0.00896539			1.93821	0.268336			8.65433	0.0200321			3.96657	0
	38.7167	0.00896539			1.94035	0.268336			8.66388	0.0200321			3.97095	0
	38.7167	0			1.94035	0			8.66388	0			3.97095	0
	38.7594	0			1.94249	0			8.67343	0			3.97532	0
	38.7594	0.00896539			1.94249	0.268336			8.67343	0.0200321			3.97532	0
	38.8021	0.00896539			1.94463	0.268336			8.68299	0.0200321			3.9797	0
	38.8021	0			1.94463	0			8.68299	0			3.9797	0
	38.8448	0			1.94677	0			8.69254	0			3.98408	0
	38.8448	0.00896539			1.94677	0.268336			8.69254	0.0200321			3.98408	0
	38.8875	0.00896539			1.94891	0.268336			8.70209	0.0200321			3.98846	0
	38.8875	0			1.94891	0			8.70209	0			3.98846	0
	38.9301	0			1.95104	0			8.71164	0			3.99284	0
	38.9301	0.00896539			1.95104	0.268336			8.71164	0.0200321			3.99284	0
	38.9728	0.00896539			1.95318	0.268336			8.72119	0.0200321			3.99721	0
	38.9728	0			1.95318	0			8.72119	0			3.99721	0
	39.0155	0			1.95532	0			8.73075	0			4.00159	0
	39.0155	0.00896539			1.95532	0.268336			8.73075	0.0200321			4.00159	0
	39.0582	0.00896539			1.95746	0.268336			8.7403	0.0200321			4.00597	0
	39.0582	0			1.95746	0			8.7403	0			4.00597	0
	39.1009	0			1.9596	0			8.74985	0			4.01035	0
	39.1009	0.00896539			1.9596	0.268336			8.74985	0.0200321			4.01035	0
	39.1436	0.00896539			1.96174	0.268336			8.7594	0.0200321			4.01473	0
	39.1436	0			1.96174	0			8.7594	0			4.01473	0
	39.1863	0			1.96388	0			8.76896	0			4.0191	0
	39.1863	0.00896539			1.96388	0.268336			8.76896	0.0200321			4.0191	0
	39.229	0.00896539			1.96602	0.268336			8.77851	0.0200321			4.02348	0
	39.229	0			1.96602	0			8.77851	0			4.02348	0
	39.2716	0			1.96816	0			8.78806	0			4.02786	0
	39.2716	0.00896539			1.96816	0.268336			8.78806	0.0200321			4.02786	0
	39.3143	0.00896539			1.9703	0.268336			8.79761	0.0200321			4.03224	0
	39.3143	0			1.9703	0			8.79761	0			4.03224	0
	39.357	0			1.97244	0			8.80716	0			4.03662	0
	39.357	0.00896539			1.97244	0.268336			8.80716	0.0200321			4.03662	0
	39.3997	0.00896539			1.97458	0.268336			8.81672	0.0200321			4.041	0
	39.3997	0			1.97458	0			8.81672	0			4.041	0
	39.4424	0			1.97672	0			8.82627	0			4.04537	0
	39.4424	0.00896539			1.97672	0.268336			8.82627	0.0200321			4.04537	0
	39.4851	0.00896539			1.97886	0.268336			8.83582	0.0200321			4.04975	0
	39.4851	0			1.97886	0			8.83582	0			4.04975	0
	39.5278	0			1.981	0			8.84537	0			4.05413	0
	39.5278	0.00896539			1.981	0.268336			8.84537	0.0200321			4.05413	0
	39.5704	0.00896539			1.98313	0.268336			8.85493	0.0200321			4.05851	0
	39.5704	0			1.98313	0			8.85493	0			4.05851	0
	39.6131	0			1.98527	0			8.86448	0			4.06289	0
	39.6131	0.00896539			1.98527	0.268336			8.86448	0.0200321			4.06289	0
	39.6558	0.00896539			1.98741	0.268336			8.87403	0.0200321			4.06726	0
	39.6558	0			1.98741	0			8.87403	0			4.06726	0
	39.6985	0			1.98955	0			8.88358	0			4.07164	0
	39.6985	0.00896539			1.98955	0.268336			8.88358	0.0200321			4.07164	0
	39.7412	0.00896539			1.99169	0.268336			8.89313	0.0200321			4.07602	0
	39.7412	0			1.99169	0			8.89313	0			4.07602	0
	39.7839	0			1.99383	0			8.90269	0			4.0804	0
	39.7839	0.00896539			1.99383	0.268336			8.90269	0.0200321			4.0804	0
	39.8266	0.00896539			1.99597	0.268336			8.91224	0.0200321			4.08478	0
	39.8266	0			1.99597	0			8.91224	0			4.08478	0
	39.8693	0			1.99811	0			8.92179	0			4.08915	0
	39.8693	0.00896539			1.99811	0.268336			8.92179	0.0200321			4.08915	0
	39.9119	0.00896539			2.00025	0.268336			8.93134	0.0200321			4.09353	0
	39.9119	0			2.00025	0			8.93134	0			4.09353	0
	39.9546	0			2.00239	0			8.9409	0			4.09791	0
	39.9546	0.00896539			2.00239	0.268336			8.9409	0.0200321			4.09791	0
	39.9973	0.00896539			2.00453	0.268336			8.95045	0.0200321			4.10229	0
	39.9973	0			2.00453	0			8.95045	0			4.10229	0
	40.04	0			2.00667	0			8.96	0			4.10667	0
	40.04	0.00896539			2.00667	0.268336			8.96	0.0200321			4.10667	0
	40.0827	0.00896539			2.00881	0.268336			8.96955	0.0200321			4.11104	0
	40.0827	0			2.00881	0			8.96955	0			4.11104	0
	40.1254	0			2.01095	0			8.9791	0			4.11542	0
	40.1254	0.00896539			2.01095	0.268336			8.9791	0.0200321			4.11542	0
	40.1681	0.00896539			2.01308	0.268336			8.98866	0.0200321			4.1198	0
	40.1681	0			2.01308	0			8.98866	0			4.1198	0
	40.2107	0			2.01522	0			8.99821	0			4.12418	0
	40.2107	0.00896539			2.01522	0.268336			8.99821	0.0200321			4.12418	0
	40.2534	0.00896539			2.01736	0.268336			9.00776	0.0200321			4.12856	0
	40.2534	0			2.01736	0			9.00776	0			4.12856	0
	40.2961	0			2.0195	0			9.01731	0			4.13294	0
	40.2961	0.00896539			2.0195	0.268336			9.01731	0.0200321			4.13294	0
	40.3388	0.00896539			2.02164	0.268336			9.02687	0.0200321			4.13731	0
	40.3388	0			2.02164	0			9.02687	0			4.13731	0
	40.3815	0			2.02378	0			9.03642	0			4.14169	0
	40.3815	0.00896539			2.02378	0.268336			9.03642	0.0200321			4.14169	0
	40.4242	0.00896539			2.02592	0.268336			9.04597	0.0200321			4.14607	0
	40.4242	0			2.02592	0			9.04597	0			4.14607	0
	40.4669	0			2.02806	0			9.05552	0			4.15045	0
	40.4669	0.00896539			2.02806	0.268336			9.05552	0.0200321			4.15045	0
	40.5096	0.00896539			2.0302	0.268336			9.06507	0.0200321			4.15483	0
	40.5096	0			2.0302	0			9.06507	0			4.15483	0
	40.5522	0			2.03234	0			9.07463	0			4.1592	0
	40.5522	0.00896539			2.03234	0.268336			9.07463	0.0200321			4.1592	0
	40.5949	0.00896539			2.03448	0.268336			9.08418	0.0200321			4.16358	0
	40.5949	0			2.03448	0			9.08418	0			4.16358	0
	40.6376	0			2.03662	0			9.09373	0			4.16796	0
	40.6376	0.00896539			2.03662	0.268336			9.09373	0.0200321			4.16796	0
	40.6803	0.00896539			2.03876	0.268336			9.10328	0.0200321			4.17234	0
	40.6803	0			2.03876	0			9.10328	0			4.17234	0
	40.723	0			2.0409	0			9.11284	0			4.17672	0
	40.723	0.00896539			2.0409	0.268336			9.11284	0.0200321			4.17672	0
	40.7657	0.00896539			2.04303	0.268336			9.12239	0.0200321			4.18109	0
	40.7657	0			2.04303	0			9.12239	0			4.18109	0
	40.8084	0			2.04517	0			9.13194	0			4.18547	0
	40.8084	0.00896539			2.04517	0.268336			9.13194	0.0200321			4.18547	0
	40.851	0.00896539			2.04731	0.268336			9.14149	0.0200321			4.18985	0
	40.851	0			2.04731	0			9.14149	0			4.18985	0
	40.8937	0			2.04945	0			9.15104	0			4.19423	0
	40.8937	0.00896539			2.04945	0.268336			9.15104	0.0200321			4.19423	0
	40.9364	0.00896539			2.05159	0.268336			9.1606	0.0200321			4.19861	0
	40.9364	0			2.05159	0			9.1606	0			4.19861	0
	40.9791	0			2.05373	0			9.17015	0			4.20299	0
	40.9791	0.00896539			2.05373	0.268336			9.17015	0.0200321			4.20299	0
	41.0218	0.00896539			2.05587	0.268336			9.1797	0.0200321			4.20736	0
	41.0218	0			2.05587	0			9.1797	0			4.20736	0
	41.0645	0			2.05801	0			9.18925	0			4.21174	0
	41.0645	0.00896539			2.05801	0.268336			9.18925	0.0200321			4.21174	0
	41.1072	0.00896539			2.06015	0.268336			9.19881	0.0200321			4.21612	0
	41.1072	0			2.06015	0			9.19881	0			4.21612	0
	41.1499	0			2.06229	0			9.20836	0			4.2205	0
	41.1499	0.00896539			2.06229	0.268336			9.20836	0.0200321			4.2205	0
	41.1925	0.00896539			2.06443	0.268336			9.21791	0.0200321			4.22488	0
	41.1925	0			2.06443	0			9.21791	0			4.22488	0
	41.2352	0			2.06657	0			9.22746	0			4.22925	0
	41.2352	0.00896539			2.06657	0.268336			9.22746	0.0200321			4.22925	0
	41.2779	0.00896539			2.06871	0.268336			9.23701	0.0200321			4.23363	0
	41.2779	0			2.06871	0			9.23701	0			4.23363	0
	41.3206	0			2.07085	0			9.24657	0			4.23801	0
	41.3206	0.00896539			2.07085	0.268336			9.24657	0.0200321			4.23801	0
	41.3633	0.00896539			2.07299	0.268336			9.25612	0.0200321			4.24239	0
	41.3633	0			2.07299	0			9.25612	0			4.24239	0
	41.406	0			2.07512	0			9.26567	0			4.24677	0
	41.406	0.00896539			2.07512	0.268336			9.26567	0.0200321			4.24677	0
	41.4487	0.00896539			2.07726	0.268336			9.27522	0.0200321			4.25114	0
	41.4487	0			2.07726	0			9.27522	0			4.25114	0
	41.4913	0			2.0794	0			9.28478	0			4.25552	0
	41.4913	0.00896539			2.0794	0.268336			9.28478	0.0200321			4.25552	0
	41.534	0.00896539			2.08154	0.268336			9.29433	0.0200321			4.2599	0
	41.534	0			2.08154	0			9.29433	0			4.2599	0
	41.5767	0			2.08368	0			9.30388	0			4.26428	0
	41.5767	0.00896539			2.08368	0.268336			9.30388	0.0200321			4.26428	0
	41.6194	0.00896539			2.08582	0.268336			9.31343	0.0200321			4.26866	0
	41.6194	0			2.08582	0			9.31343	0			4.26866	0
	41.6621	0			2.08796	0			9.32299	0			4.27303	0
	41.6621	0.00896539			2.08796	0.268336			9.32299	0.0200321			4.27303	0
	41.7048	0.00896539			2.0901	0.268336			9.33254	0.0200321			4.27741	0
	41.7048	0			2.0901	0			9.33254	0			4.27741	0
	41.7475	0			2.09224	0			9.34209	0			4.28179	0
	41.7475	0.00896539			2.09224	0.268336			9.34209	0.0200321			4.28179	0
	41.7901	0.00896539			2.09438	0.268336			9.35164	0.0200321			4.28617	0
	41.7901	0			2.09438	0			9.35164	0			4.28617	0
	41.8328	0			2.09652	0			9.36119	0			4.29055	0
	41.8328	0.00896539			2.09652	0.268336			9.36119	0.0200321			4.29055	0
	41.8755	0.00896539			2.09866	0.268336			9.37075	0.0200321			4.29493	0
	41.8755	0			2.09866	0			9.37075	0			4.29493	0
	41.9182	0			2.1008	0			9.3803	0			4.2993	0
	41.9182	0.00896539			2.1008	0.268336			9.3803	0.0200321			4.2993	0
	41.9609	0.00896539			2.10294	0.268336			9.38985	0.0200321			4.30368	0
	41.9609	0			2.10294	0			9.38985	0			4.30368	0
	42.0036	0			2.10507	0			9.3994	0			4.30806	0
	42.0036	0.00896539			2.10507	0.268336			9.3994	0.0200321			4.30806	0
	42.0463	0.00896539			2.10721	0.268336			9.40896	0.0200321			4.31244	0
	42.0463	0			2.10721	0			9.40896	0			4.31244	0
	42.089	0			2.10935	0			9.41851	0			4.31682	0
	42.089	0.00896539			2.10935	0.268336			9.41851	0.0200321			4.31682	0
	42.1316	0.00896539			2.11149	0.268336			9.42806	0.0200321			4.32119	0
	42.1316	0			2.11149	0			9.42806	0			4.32119	0
	42.1743	0			2.11363	0			9.43761	0			4.32557	0
	42.1743	0.00896539			2.11363	0.268336			9.43761	0.0200321			4.32557	0
	42.217	0.00896539			2.11577	0.268336			9.44716	0.0200321			4.32995	0
	42.217	0			2.11577	0			9.44716	0			4.32995	0
	42.2597	0			2.11791	0			9.45672	0			4.33433	0
	42.2597	0.00896539			2.11791	0.268336			9.45672	0.0200321			4.33433	0
	42.3024	0.00896539			2.12005	0.268336			9.46627	0.0200321			4.33871	0
	42.3024	0			2.12005	0			9.46627	0			4.33871	0
	42.3451	0			2.12219	0			9.47582	0			4.34308	0
	42.3451	0.00896539			2.12219	0.268336			9.47582	0.0200321			4.34308	0
	42.3878	0.00896539			2.12433	0.268336			9.48537	0.0200321			4.34746	0
	42.3878	0			2.12433	0			9.48537	0			4.34746	0
	42.4304	0			2.12647	0			9.49493	0			4.35184	0
	42.4304	0.00896539			2.12647	0.268336			9.49493	0.0200321			4.35184	0
	42.4731	0.00896539			2.12861	0.268336			9.50448	0.0200321			4.35622	0
	42.4731	0			2.12861	0			9.50448	0			4.35622	0
	42.5158	0			2.13075	0			9.51403	0			4.3606	0
	42.5158	0.00896539			2.13075	0.268336			9.51403	0.0200321			4.3606	0
	42.5585	0.00896539			2.13289	0.268336			9.52358	0.0200321			4.36498	0
	42.5585	0			2.13289	0			9.52358	0			4.36498	0
	42.6012	0			2.13502	0			9.53313	0			4.36935	0
	42.6012	0.00896539			2.13502	0.268336			9.53313	0.0200321			4.36935	0
	42.6439	0.00896539			2.13716	0.268336			9.54269	0.0200321			4.37373	0
	42.6439	0			2.13716	0			9.54269	0			4.37373	0
[truncated: 2,020 more rows]

## Sheet: Kutools_Chart
#REF!	#REF!	#REF!	#REF!	#REF!	#REF!	0	#REF!	#REF!
#REF!	#REF!	#REF!	#REF!	#REF!	#REF!	0	20	20
#REF!	#REF!	#REF!	#REF!	#REF!	#REF!	0.25	#REF!	#N/A
#REF!	#REF!	#REF!	#REF!	#REF!	#REF!	0	#REF!	70
#REF!	#REF!	#REF!	#REF!	#REF!	#REF!	0	#REF!	#REF!
#REF!	#REF!	#REF!	#REF!	#REF!	#REF!
#REF!	#REF!	#REF!	#REF!	#REF!	#REF!
#REF!	#REF!	#REF!	#REF!	#REF!	#REF!
#REF!	#REF!	#REF!	#REF!	#REF!	#REF!
#REF!	#REF!	#REF!	#REF!	#REF!	#REF!
#REF!	#REF!	#REF!	#REF!	#REF!	#REF!
#REF!	#REF!	#REF!	#REF!	#REF!	#REF!
#REF!	#REF!	#REF!	#REF!	#REF!	#REF!
注意：這組數據是在創建截斷Y軸圖時生成的，請勿修改或刪除，以免造成截斷Y軸圖錯誤
